# Supplementary material for: Beyond polyphagy and opportunism: natural prey of hunting spiders in the canopy of apple trees
Source: PeerJ. 2020 Jun 19;8:e9334. doi: 10.7717/peerj.9334 (PMC7307562; doi:10.7717/peerj.9334)
Supplement: Supplemental Information 1 — For detailed information see the Info sheet of the file. [file peerj-08-9334-s001.xlsx]

## Sheet: Info
Supplementary dataset for the article Mezőfi et al., 2020: Beyond polyphagy and opportunism: natural prey of hunting spiders in the canopy of apple trees
Column name
Coll_date	Date when the sample was collected.
County	County where the orchard is located.
Site	Site (orchard) where the sample was collected.
Family	Family of the hunting spider.
Spider_Species	Specific identity of the hunting spider.
Groups	The five most abundant spider groups/taxa used for the analyses: C_xanthogramma, Other_salticids, Ph_cespitum, E_tricuspidata, Xysticus, Clubiona
Stage	Life stage of the spider (when collected): juv (juvenile), subadult, adult
Sex	Sex of the spider individual: female, male
Prosoma_width_mm	The prosoma width of the spider in mm at 0.1 mm accuracy.
Prey_predator_ratio	Prey thorax width / predator (spider) prosoma width.
Prey_Taxa1_a	Taxonomic category of the prey: Acari, Araneae, Coleoptera, Lepidoptera, Formicidae, Other Hymenoptera, Brachycera, Nematocera, Auchenorrhyncha, Heteroptera, Sternorrhyncha, Ephemeroptera, Neuroptera, Psocoptera, Thysanoptera, Trichoptera
Prey_Taxa1_b	Taxonomic category of the prey (the less abundant taxa were grouped into the category 'Other prey'): Araneae, Coleoptera, Lepidoptera, Formicidae, Other Hymenoptera, Brachycera, Nematocera, Auchenorrhyncha, Heteroptera, Sternorrhyncha, Other prey
Prey_Taxa2	Lower level taxonomic identity of the prey (if its condition allowed the identification).
Prey_Species	Specific identity of the prey item (if its condition allowed the identification).
Thorax_width_mm	Thorax width of the prey in mm at 0.1 mm accuracy (if its condition allowed the measuring).
Prey_function	Economic status of the prey item in apple orchards in Central Europe: natural_enemy, neutral, pest (see definitions in the main text).
Note	Notes regarding the prey item.

## Sheet: Data S1
Nr.	Coll_date	Year	Month	Season	County	Site	Family	Spider_Species	Groups	Stage	Sex	Prosoma_width_mm	Prey_predator_ratio	Prey_Taxa1_a	Prey_Taxa1_b	Prey_Taxa2	Prey_Species	Thorax_width_mm	Prey_function	Note
1	2014.04.04.	2014	4	Spring	Szabolcs-Szatmár-Bereg	SSB_Orchard_1_Újfehértó	Salticidae	Carrhotus xanthogramma	C_xanthogramma	adult	Female	2	0.9	Neuroptera	Other prey	Hemerobiidae		1.8	natural_enemy
2	2014.04.04.	2014	4	Spring	Szabolcs-Szatmár-Bereg	SSB_Orchard_1_Újfehértó	Salticidae	Carrhotus xanthogramma	C_xanthogramma					Heteroptera	Heteroptera	Anthocoridae	Orius sp.	0.9	natural_enemy
3	2014.04.04.	2014	4	Spring	Szabolcs-Szatmár-Bereg	SSB_Orchard_1_Újfehértó	Thomisidae	Ebrechtella tricuspidata	E_tricuspidata	adult	Female	2.2	0.795455	Nematocera	Nematocera	Nematocera		1.75	neutral
4	2014.04.04.	2014	4	Spring	Szabolcs-Szatmár-Bereg	SSB_Orchard_1_Újfehértó	Thomisidae	Ebrechtella tricuspidata	E_tricuspidata	adult	Female	2	0.6	Heteroptera	Heteroptera	Anthocoridae	Orius sp.	1.2	natural_enemy
5	2014.04.04.	2014	4	Spring	Szabolcs-Szatmár-Bereg	SSB_Orchard_1_Újfehértó	Thomisidae	Ebrechtella tricuspidata	E_tricuspidata	adult	Female	1.9	0.657895	Nematocera	Nematocera	Nematocera		1.25	neutral
6	2014.04.04.	2014	4	Spring	Szabolcs-Szatmár-Bereg	SSB_Orchard_1_Újfehértó	Thomisidae	Ebrechtella tricuspidata	E_tricuspidata					Nematocera	Nematocera	Nematocera		0.9	neutral
7	2014.04.18.	2014	4	Spring	Szabolcs-Szatmár-Bereg	SSB_Orchard_1_Újfehértó	Salticidae	Carrhotus xanthogramma	C_xanthogramma			2.1	1.16667	Nematocera	Nematocera	Nematocera	Bibio sp.	2.45	neutral
8	2014.04.18.	2014	4	Spring	Szabolcs-Szatmár-Bereg	SSB_Orchard_1_Újfehértó	Thomisidae	Xysticus ulmi	Xysticus	adult	Female	2.2	1.22727	Nematocera	Nematocera	Nematocera	Bibio sp.	2.7	neutral
9	2014.04.18.	2014	4	Spring	Szabolcs-Szatmár-Bereg	SSB_Orchard_1_Újfehértó	Salticidae	Salticus scenicus	Other_salticids	adult	Male	1.6	1.125	Brachycera	Brachycera	Brachycera		1.8	neutral
10	2014.04.18.	2014	4	Spring	Szabolcs-Szatmár-Bereg	SSB_Orchard_1_Újfehértó	Thomisidae	Runcinia grammica		juv		0.9	1.44444	Brachycera	Brachycera	Brachycera		1.3	neutral
11	2014.04.18.	2014	4	Spring	Szabolcs-Szatmár-Bereg	SSB_Orchard_1_Újfehértó	Thomisidae	Xysticus ulmi	Xysticus	adult	Female	2	1.7	Nematocera	Nematocera	Nematocera	Bibio sp.	3.4	neutral
12	2014.04.18.	2014	4	Spring	Szabolcs-Szatmár-Bereg	SSB_Orchard_1_Újfehértó	Thomisidae	Misumena vatia		adult	Male	1.1	1.90909	Brachycera	Brachycera	Brachycera		2.1	neutral
13	2014.04.18.	2014	4	Spring	Szabolcs-Szatmár-Bereg	SSB_Orchard_1_Újfehértó	Philodromidae	Philodromus cespitum	Ph_cespitum	juv		1.1	0.636364	Araneae	Araneae	Theridiidae		0.7	natural_enemy
14	2014.04.18.	2014	4	Spring	Szabolcs-Szatmár-Bereg	SSB_Orchard_1_Újfehértó	Philodromidae	Philodromus cespitum	Ph_cespitum	subadult	Female			Nematocera	Nematocera	Nematocera		1.9	neutral
15	2014.04.18.	2014	4	Spring	Szabolcs-Szatmár-Bereg	SSB_Orchard_1_Újfehértó	Philodromidae	Philodromus cespitum	Ph_cespitum	subadult	Male			Nematocera	Nematocera	Nematocera		0.9	neutral
16	2014.04.18.	2014	4	Spring	Szabolcs-Szatmár-Bereg	SSB_Orchard_1_Újfehértó	Clubionidae	Clubiona sp.	Clubiona	juv				Lepidoptera	Lepidoptera	cf. Tortricidae		0.8	pest	larva
17	2014.04.18.	2014	4	Spring	Szabolcs-Szatmár-Bereg	SSB_Orchard_1_Újfehértó	Clubionidae	Clubiona sp.	Clubiona	juv				Nematocera	Nematocera	Nematocera		0.65	neutral
18	2014.04.18.	2014	4	Spring	Szabolcs-Szatmár-Bereg	SSB_Orchard_1_Újfehértó	Thomisidae	Xysticus ulmi	Xysticus	adult	Female	2	0.4	Formicidae	Formicidae	Formicidae		0.8	neutral	worker
19	2014.04.18.	2014	4	Spring	Szabolcs-Szatmár-Bereg	SSB_Orchard_1_Újfehértó	Salticidae	Carrhotus xanthogramma	C_xanthogramma	adult	Male			Brachycera	Brachycera	Brachycera		1.6	neutral
20	2014.04.18.	2014	4	Spring	Szabolcs-Szatmár-Bereg	SSB_Orchard_1_Újfehértó	Salticidae	Heliophanus auratus	Other_salticids			1.3	0.769231	Heteroptera	Heteroptera	Anthocoridae	Orius sp.	1	natural_enemy
21	2014.04.28.	2014	4	Spring	Szabolcs-Szatmár-Bereg	SSB_Orchard_1_Újfehértó	Salticidae	Heliophanus auratus	Other_salticids					Sternorrhyncha	Sternorrhyncha	Aphididae	Aphis pomi		pest
22	2014.04.28.	2014	4	Spring	Szabolcs-Szatmár-Bereg	SSB_Orchard_1_Újfehértó	Philodromidae	Philodromus cespitum	Ph_cespitum	juv				Nematocera	Nematocera	Nematocera		1.2	neutral
23	2014.04.28.	2014	4	Spring	Szabolcs-Szatmár-Bereg	SSB_Orchard_1_Újfehértó	Philodromidae	Philodromus cespitum	Ph_cespitum	juv				Nematocera	Nematocera	Nematocera		1.45	neutral
24	2014.04.28.	2014	4	Spring	Szabolcs-Szatmár-Bereg	SSB_Orchard_1_Újfehértó	Philodromidae	Philodromus cespitum	Ph_cespitum	juv				Nematocera	Nematocera	Nematocera		1.2	neutral
25	2014.04.28.	2014	4	Spring	Szabolcs-Szatmár-Bereg	SSB_Orchard_1_Újfehértó	Philodromidae	Philodromus cespitum	Ph_cespitum	juv				Nematocera	Nematocera	Nematocera		1.15	neutral
26	2014.04.28.	2014	4	Spring	Szabolcs-Szatmár-Bereg	SSB_Orchard_1_Újfehértó	Philodromidae	Philodromus cespitum	Ph_cespitum			1.1	1.18182	Nematocera	Nematocera	Nematocera		1.3	neutral
27	2014.04.28.	2014	4	Spring	Szabolcs-Szatmár-Bereg	SSB_Orchard_1_Újfehértó	Philodromidae	Philodromus cespitum	Ph_cespitum			1.4	1.07143	Nematocera	Nematocera	Nematocera		1.5	neutral
28	2014.05.17.	2014	5	Spring	Szabolcs-Szatmár-Bereg	SSB_Orchard_1_Újfehértó	Thomisidae	Synema globosum				1.1	0.818182	Formicidae	Formicidae	Formicidae		0.9	neutral	worker
29	2014.06.19.	2014	6	Summer	Szabolcs-Szatmár-Bereg	SSB_Orchard_1_Újfehértó	Philodromidae	Philodromus cespitum	Ph_cespitum	adult	Male	1.5	0.533333	Sternorrhyncha	Sternorrhyncha	Aphididae		0.8	pest
30	2014.06.19.	2014	6	Summer	Szabolcs-Szatmár-Bereg	SSB_Orchard_1_Újfehértó	Philodromidae	Philodromus cespitum	Ph_cespitum	juv		1.1	0.272727	Thysanoptera	Other prey			0.3	neutral
31	2014.06.19.	2014	6	Summer	Szabolcs-Szatmár-Bereg	SSB_Orchard_1_Újfehértó	Salticidae	Heliophanus cupreus	Other_salticids	adult	Male	1.2	0.416667	Sternorrhyncha	Sternorrhyncha	Aphididae	Aphis pomi	0.5	pest
32	2014.06.19.	2014	6	Summer	Szabolcs-Szatmár-Bereg	SSB_Orchard_1_Újfehértó	Philodromidae	Philodromus cespitum	Ph_cespitum	adult	Male	2	0.3	Acari	Other prey			0.6	neutral
33	2014.06.19.	2014	6	Summer	Szabolcs-Szatmár-Bereg	SSB_Orchard_1_Újfehértó	Clubionidae	Clubiona sp.	Clubiona	adult	Male	1.2	0.75	Brachycera	Brachycera	Brachycera		0.9	neutral
34	2014.06.19.	2014	6	Summer	Szabolcs-Szatmár-Bereg	SSB_Orchard_1_Újfehértó	Clubionidae	Clubiona frutetorum	Clubiona	adult	Female	1.5	0.266667	Sternorrhyncha	Sternorrhyncha	Aphididae		0.4	pest
35	2014.06.19.	2014	6	Summer	Szabolcs-Szatmár-Bereg	SSB_Orchard_1_Újfehértó	Thomisidae	Xysticus sp.	Xysticus	juv		1.3	0.538462	Formicidae	Formicidae	Formicidae		0.7	neutral	worker
36	2014.06.19.	2014	6	Summer	Szabolcs-Szatmár-Bereg	SSB_Orchard_1_Újfehértó	Philodromidae	Philodromus cespitum	Ph_cespitum	adult	Female			Sternorrhyncha	Sternorrhyncha	Aphididae	Aphis pomi		pest
37	2014.06.19.	2014	6	Summer	Szabolcs-Szatmár-Bereg	SSB_Orchard_1_Újfehértó	Philodromidae	Philodromus cespitum	Ph_cespitum	adult	Female			Araneae	Araneae	Philodromidae	Philodromus cespitum		natural_enemy	adult male
38	2014.05.17.	2014	5	Spring	Szabolcs-Szatmár-Bereg	SSB_Orchard_1_Újfehértó	Thomisidae	Ebrechtella tricuspidata	E_tricuspidata	adult	Male	1.5	1.46667	Brachycera	Brachycera	Brachycera		2.2	neutral
39	2014.05.20.	2014	5	Spring	Szabolcs-Szatmár-Bereg	SSB_Orchard_1_Újfehértó	Thomisidae	Ebrechtella tricuspidata	E_tricuspidata	subadult	Female			Brachycera	Brachycera	Syrphidae	Episyrphus balteatus		natural_enemy	imago
40	2014.07.09.	2014	7	Summer	Szabolcs-Szatmár-Bereg	SSB_Orchard_1_Újfehértó	Salticidae	Carrhotus xanthogramma	C_xanthogramma	juv		0.9	0.666667	Araneae	Araneae	Theridiidae	Lasaeola prona	0.6	natural_enemy	adult male
41	2014.07.09.	2014	7	Summer	Szabolcs-Szatmár-Bereg	SSB_Orchard_1_Újfehértó	Salticidae	Carrhotus xanthogramma	C_xanthogramma	juv		0.8	0.625	Araneae	Araneae			0.5	natural_enemy
42	2014.07.09.	2014	7	Summer	Szabolcs-Szatmár-Bereg	SSB_Orchard_1_Újfehértó	Salticidae	Carrhotus xanthogramma	C_xanthogramma	juv		0.9	0.333333	Sternorrhyncha	Sternorrhyncha	Aphididae	Aphis pomi	0.3	pest
43	2014.07.09.	2014	7	Summer	Szabolcs-Szatmár-Bereg	SSB_Orchard_1_Újfehértó	Philodromidae	Philodromus cespitum	Ph_cespitum	juv				Nematocera	Nematocera	Nematocera		0.5	neutral
44	2014.07.09.	2014	7	Summer	Szabolcs-Szatmár-Bereg	SSB_Orchard_1_Újfehértó	Philodromidae	Philodromus cespitum	Ph_cespitum	adult	Female			Brachycera	Brachycera	Brachycera		0.8	neutral
45	2014.08.12.	2014	8	Summer	Szabolcs-Szatmár-Bereg	SSB_Orchard_1_Újfehértó	Philodromidae	Philodromus cespitum	Ph_cespitum	juv		1.4	1.07143	Brachycera	Brachycera	Brachycera		1.5	neutral
46	2014.08.12.	2014	8	Summer	Szabolcs-Szatmár-Bereg	SSB_Orchard_1_Újfehértó	Philodromidae	Philodromus cespitum	Ph_cespitum	juv		0.7	0.428571	Nematocera	Nematocera	Nematocera		0.3	neutral
47	2014.08.12.	2014	8	Summer	Szabolcs-Szatmár-Bereg	SSB_Orchard_1_Újfehértó	Philodromidae	Philodromus cespitum	Ph_cespitum	juv		0.7	0.571429	Sternorrhyncha	Sternorrhyncha	Aphididae	Aphis pomi	0.4	pest
48	2014.09.09.	2014	9	Fall	Szabolcs-Szatmár-Bereg	SSB_Orchard_1_Újfehértó	Thomisidae	Ebrechtella tricuspidata	E_tricuspidata	adult	Male	1.7	0.470588	Brachycera	Brachycera	Brachycera		0.8	neutral
49	2014.09.09.	2014	9	Fall	Szabolcs-Szatmár-Bereg	SSB_Orchard_1_Újfehértó	Thomisidae	Ebrechtella tricuspidata	E_tricuspidata	adult	Male	1.6	0.5625	Heteroptera	Heteroptera	Miridae	cf. Campylomma sp.	0.9	natural_enemy
50	2014.09.09.	2014	9	Fall	Szabolcs-Szatmár-Bereg	SSB_Orchard_1_Újfehértó	Thomisidae	Ebrechtella tricuspidata	E_tricuspidata	subadult	Female	1.7	0.470588	Heteroptera	Heteroptera	Miridae	cf. Campylomma sp.	0.8	natural_enemy
51	2014.09.09.	2014	9	Fall	Szabolcs-Szatmár-Bereg	SSB_Orchard_1_Újfehértó	Thomisidae	Ebrechtella tricuspidata	E_tricuspidata	subadult	Female	1.7	0.529412	Heteroptera	Heteroptera	Miridae	cf. Campylomma sp.	0.9	natural_enemy
52	2014.09.09.	2014	9	Fall	Szabolcs-Szatmár-Bereg	SSB_Orchard_1_Újfehértó	Philodromidae	Philodromus cespitum	Ph_cespitum	subadult	Male	1.7	0.470588	Heteroptera	Heteroptera	Miridae	cf. Campylomma sp.	0.8	natural_enemy
53	2014.09.09.	2014	9	Fall	Szabolcs-Szatmár-Bereg	SSB_Orchard_1_Újfehértó	Thomisidae	Xysticus sp.	Xysticus	juv		1.3	0.692308	Heteroptera	Heteroptera	Miridae	cf. Campylomma sp.	0.9	natural_enemy
54	2014.09.09.	2014	9	Fall	Szabolcs-Szatmár-Bereg	SSB_Orchard_1_Újfehértó	Thomisidae	Xysticus (Spiracme) striatipes	Xysticus	adult	Male	2.4	0.375	Formicidae	Formicidae	Formicidae		0.9	neutral	worker
55	2014.09.09.	2014	9	Fall	Szabolcs-Szatmár-Bereg	SSB_Orchard_1_Újfehértó	Cheiracanthiidae	Cheiracanthium sp.		juv		1.8		Heteroptera	Heteroptera	Miridae			neutral
56	2014.09.09.	2014	9	Fall	Szabolcs-Szatmár-Bereg	SSB_Orchard_1_Újfehértó	Cheiracanthiidae	Cheiracanthium sp.		juv		1.8		Nematocera	Nematocera	Nematocera			neutral
57	2014.09.09.	2014	9	Fall	Szabolcs-Szatmár-Bereg	SSB_Orchard_1_Újfehértó	Cheiracanthiidae	Cheiracanthium sp.		juv		1.7		Heteroptera	Heteroptera	Miridae			natural_enemy
58	2014.09.09.	2014	9	Fall	Szabolcs-Szatmár-Bereg	SSB_Orchard_1_Újfehértó	Cheiracanthiidae	Cheiracanthium sp.		juv		1.2		Heteroptera	Heteroptera	Miridae			natural_enemy
59	2014.09.23.	2014	9	Fall	Pest	P_Orchard_4	Philodromidae	Philodromus sp.		juv		0.9	0.555556	Sternorrhyncha	Sternorrhyncha	Aphididae		0.5	pest
60	2015.04.16.	2015	4	Spring	Szabolcs-Szatmár-Bereg	SSB_Orchard_1_Újfehértó	Philodromidae	Philodromus cespitum	Ph_cespitum	juv				Sternorrhyncha	Sternorrhyncha	Aphididae	Dysaphis plantaginea		pest
61	2015.04.16.	2015	4	Spring	Szabolcs-Szatmár-Bereg	SSB_Orchard_1_Újfehértó	Philodromidae	Philodromus cespitum	Ph_cespitum	juv				Sternorrhyncha	Sternorrhyncha	Aphididae	Dysaphis plantaginea		pest
62	2015.04.16.	2015	4	Spring	Szabolcs-Szatmár-Bereg	SSB_Orchard_1_Újfehértó	Philodromidae	Philodromus cespitum	Ph_cespitum	juv				Sternorrhyncha	Sternorrhyncha	Aphididae	Dysaphis plantaginea		pest
63	2015.04.16.	2015	4	Spring	Szabolcs-Szatmár-Bereg	SSB_Orchard_1_Újfehértó	Philodromidae	Philodromus cespitum	Ph_cespitum	juv				Sternorrhyncha	Sternorrhyncha	Aphididae	Dysaphis plantaginea		pest
64	2015.04.16.	2015	4	Spring	Szabolcs-Szatmár-Bereg	SSB_Orchard_1_Újfehértó	Philodromidae	Philodromus cespitum	Ph_cespitum	juv				Sternorrhyncha	Sternorrhyncha	Aphididae	Dysaphis plantaginea		pest	fundatrix
65	2015.04.16.	2015	4	Spring	Szabolcs-Szatmár-Bereg	SSB_Orchard_1_Újfehértó	Cheiracanthiidae	Cheiracanthium sp.		juv				Sternorrhyncha	Sternorrhyncha	Aphididae	Dysaphis plantaginea		pest
66	2015.04.25.	2015	4	Spring	Szabolcs-Szatmár-Bereg	SSB_Orchard_1_Újfehértó	Philodromidae	Philodromus cespitum	Ph_cespitum	juv				Nematocera	Nematocera	Nematocera	Bibio sp.	2.1	neutral
67	2015.04.24.	2015	4	Spring	Szabolcs-Szatmár-Bereg	SSB_Orchard_1_Újfehértó	Clubionidae	Clubiona sp.	Clubiona	subadult	Male			Nematocera	Nematocera	Nematocera		1.2	neutral
68	2015.04.25.	2015	4	Spring	Szabolcs-Szatmár-Bereg	SSB_Orchard_1_Újfehértó	Philodromidae	Philodromus cespitum	Ph_cespitum	juv				Brachycera	Brachycera	Brachycera		1.1	neutral
69	2015.04.25.	2015	4	Spring	Szabolcs-Szatmár-Bereg	SSB_Orchard_1_Újfehértó	Philodromidae	Philodromus cespitum	Ph_cespitum	juv				Nematocera	Nematocera	Nematocera		1.3	neutral
70	2015.04.25.	2015	4	Spring	Szabolcs-Szatmár-Bereg	SSB_Orchard_1_Újfehértó	Thomisidae	Ebrechtella tricuspidata	E_tricuspidata	subadult	Female			Nematocera	Nematocera	Nematocera	Bibio sp.	2.6	neutral
71	2015.04.25.	2015	4	Spring	Szabolcs-Szatmár-Bereg	SSB_Orchard_1_Újfehértó	Cheiracanthiidae	Cheiracanthium sp.		juv				Lepidoptera	Lepidoptera	Tortricidae	cf. Recurvaria sp.	0.8	pest	larva
72	2015.04.25.	2015	4	Spring	Szabolcs-Szatmár-Bereg	SSB_Orchard_1_Újfehértó	Thomisidae	Ebrechtella tricuspidata	E_tricuspidata	subadult	Female			Nematocera	Nematocera	Nematocera	Bibio sp.	2.7	neutral
73	2015.04.25.	2015	4	Spring	Szabolcs-Szatmár-Bereg	SSB_Orchard_1_Újfehértó	Clubionidae	Clubiona sp.	Clubiona	juv				Sternorrhyncha	Sternorrhyncha	Aphididae	Dysaphis plantaginea		pest
74	2015.04.25.	2015	4	Spring	Szabolcs-Szatmár-Bereg	SSB_Orchard_1_Újfehértó	Philodromidae	Philodromus cespitum	Ph_cespitum	juv				Nematocera	Nematocera	Nematocera	Bibio sp.		neutral
75	2015.05.06.	2015	5	Spring	Szabolcs-Szatmár-Bereg	SSB_Orchard_1_Újfehértó	Thomisidae	Xysticus kochi	Xysticus	adult	Female	2.9	0.758621	Coleoptera	Coleoptera	Curculionidae	Phyllobius sp.	2.2	pest
76	2015.05.06.	2015	5	Spring	Szabolcs-Szatmár-Bereg	SSB_Orchard_1_Újfehértó	Thomisidae	Xysticus ulmi	Xysticus	adult	Female	2.5	0.88	Coleoptera	Coleoptera	Curculionidae	Phyllobius sp.	2.2	pest
77	2015.05.06.	2015	5	Spring	Szabolcs-Szatmár-Bereg	SSB_Orchard_1_Újfehértó	Thomisidae	Synema globosum		subadult	Female	1.9	1.15789	Coleoptera	Coleoptera	Curculionidae	Phyllobius sp.	2.2	pest
78	2015.05.07.	2015	5	Spring	Szabolcs-Szatmár-Bereg	SSB_Orchard_1_Újfehértó	Philodromidae	Philodromus cespitum	Ph_cespitum	juv				Nematocera	Nematocera	Nematocera		1.3	neutral
79	2015.05.07.	2015	5	Spring	Szabolcs-Szatmár-Bereg	SSB_Orchard_1_Újfehértó	Philodromidae	Philodromus cespitum	Ph_cespitum	juv				Nematocera	Nematocera	Nematocera		1.2	neutral
80	2015.05.07.	2015	5	Spring	Szabolcs-Szatmár-Bereg	SSB_Orchard_1_Újfehértó	Philodromidae	Philodromus cespitum	Ph_cespitum	juv				Nematocera	Nematocera	Nematocera		1.1	neutral
81	2015.05.07.	2015	5	Spring	Szabolcs-Szatmár-Bereg	SSB_Orchard_1_Újfehértó	Philodromidae	Philodromus cespitum	Ph_cespitum	juv				Sternorrhyncha	Sternorrhyncha	Aphididae		0.6	pest
82	2015.05.07.	2015	5	Spring	Szabolcs-Szatmár-Bereg	SSB_Orchard_1_Újfehértó	Philodromidae	Philodromus cespitum	Ph_cespitum	juv				Nematocera	Nematocera	Nematocera		1.2	neutral
83	2015.05.07.	2015	5	Spring	Szabolcs-Szatmár-Bereg	SSB_Orchard_1_Újfehértó	Philodromidae	Philodromus cespitum	Ph_cespitum	juv				Nematocera	Nematocera	Nematocera		1.1	neutral
84	2015.05.07.	2015	5	Spring	Szabolcs-Szatmár-Bereg	SSB_Orchard_1_Újfehértó	Philodromidae	Philodromus cespitum	Ph_cespitum	juv				Nematocera	Nematocera	Nematocera		1.5	neutral
85	2015.05.07.	2015	5	Spring	Szabolcs-Szatmár-Bereg	SSB_Orchard_1_Újfehértó	Philodromidae	Philodromus cespitum	Ph_cespitum	juv				Nematocera	Nematocera	Nematocera		1.1	neutral
86	2015.05.07.	2015	5	Spring	Szabolcs-Szatmár-Bereg	SSB_Orchard_1_Újfehértó	Philodromidae	Philodromus cespitum	Ph_cespitum	juv				Nematocera	Nematocera	Nematocera		1.6	neutral
87	2015.05.07.	2015	5	Spring	Szabolcs-Szatmár-Bereg	SSB_Orchard_1_Újfehértó	Philodromidae	Philodromus cespitum	Ph_cespitum	juv				Nematocera	Nematocera	Nematocera		0.8	neutral
88	2015.05.07.	2015	5	Spring	Szabolcs-Szatmár-Bereg	SSB_Orchard_1_Újfehértó	Philodromidae	Philodromus cespitum	Ph_cespitum	juv				Nematocera	Nematocera	Nematocera		1.7	neutral
89	2015.05.07.	2015	5	Spring	Szabolcs-Szatmár-Bereg	SSB_Orchard_1_Újfehértó	Philodromidae	Philodromus cespitum	Ph_cespitum	juv				Nematocera	Nematocera	Nematocera		1.4	neutral
90	2015.05.07.	2015	5	Spring	Szabolcs-Szatmár-Bereg	SSB_Orchard_1_Újfehértó	Philodromidae	Philodromus cespitum	Ph_cespitum	juv				Nematocera	Nematocera	Nematocera		1	neutral
91	2015.05.07.	2015	5	Spring	Szabolcs-Szatmár-Bereg	SSB_Orchard_1_Újfehértó	Philodromidae	Philodromus cespitum	Ph_cespitum	juv				Nematocera	Nematocera	Nematocera		1.1	neutral
92	2015.05.07.	2015	5	Spring	Szabolcs-Szatmár-Bereg	SSB_Orchard_1_Újfehértó	Philodromidae	Philodromus cespitum	Ph_cespitum	juv				Nematocera	Nematocera	Nematocera		2.1	neutral
93	2015.05.07.	2015	5	Spring	Szabolcs-Szatmár-Bereg	SSB_Orchard_1_Újfehértó	Philodromidae	Philodromus cespitum	Ph_cespitum	juv				Nematocera	Nematocera	Nematocera		1.1	neutral
94	2015.05.07.	2015	5	Spring	Szabolcs-Szatmár-Bereg	SSB_Orchard_1_Újfehértó	Philodromidae	Philodromus cespitum	Ph_cespitum	juv				Nematocera	Nematocera	Nematocera		1	neutral
95	2015.05.07.	2015	5	Spring	Szabolcs-Szatmár-Bereg	SSB_Orchard_1_Újfehértó	Philodromidae	Philodromus cespitum	Ph_cespitum	juv				Nematocera	Nematocera	Nematocera		0.4	neutral
96	2015.05.07.	2015	5	Spring	Szabolcs-Szatmár-Bereg	SSB_Orchard_1_Újfehértó	Philodromidae	Philodromus cespitum	Ph_cespitum	subadult	Female			Nematocera	Nematocera	Nematocera	Tipulomorpha sp.	2.3	neutral
97	2015.05.07.	2015	5	Spring	Szabolcs-Szatmár-Bereg	SSB_Orchard_1_Újfehértó	Clubionidae	Clubiona sp.	Clubiona	juv				Brachycera	Brachycera	Brachycera		1.3	neutral
98	2015.05.07.	2015	5	Spring	Szabolcs-Szatmár-Bereg	SSB_Orchard_1_Újfehértó	Salticidae	Heliophanus auratus	Other_salticids	adult	Female			Lepidoptera	Lepidoptera	Adelidae		1	neutral	imago
99	2015.05.07.	2015	5	Spring	Szabolcs-Szatmár-Bereg	SSB_Orchard_1_Újfehértó	Pisauridae	Pisaura mirabilis		adult	Female			Nematocera	Nematocera	Nematocera	Tipulomorpha sp.	2.9	neutral
100	2015.05.09.	2015	5	Spring	Szabolcs-Szatmár-Bereg	SSB_Orchard_1_Újfehértó	Philodromidae	Philodromus cespitum	Ph_cespitum	juv				Nematocera	Nematocera	Nematocera		1.3	neutral
101	2015.05.09.	2015	5	Spring	Szabolcs-Szatmár-Bereg	SSB_Orchard_1_Újfehértó	Philodromidae	Philodromus cespitum	Ph_cespitum	juv				Nematocera	Nematocera	Nematocera		0.8	neutral
102	2015.05.09.	2015	5	Spring	Szabolcs-Szatmár-Bereg	SSB_Orchard_1_Újfehértó	Philodromidae	Philodromus cespitum	Ph_cespitum	juv				Brachycera	Brachycera	Brachycera		1.2	neutral
103	2015.05.09.	2015	5	Spring	Szabolcs-Szatmár-Bereg	SSB_Orchard_1_Újfehértó	Philodromidae	Philodromus cespitum	Ph_cespitum	juv				Nematocera	Nematocera	Nematocera		1.1	neutral
104	2015.05.09.	2015	5	Spring	Szabolcs-Szatmár-Bereg	SSB_Orchard_1_Újfehértó	Philodromidae	Philodromus cespitum	Ph_cespitum	juv				Nematocera	Nematocera	Nematocera		1.3	neutral
105	2015.05.09.	2015	5	Spring	Szabolcs-Szatmár-Bereg	SSB_Orchard_1_Újfehértó	Philodromidae	Philodromus cespitum	Ph_cespitum	juv				Nematocera	Nematocera	Nematocera		1.2	neutral
106	2015.05.09.	2015	5	Spring	Szabolcs-Szatmár-Bereg	SSB_Orchard_1_Újfehértó	Philodromidae	Philodromus cespitum	Ph_cespitum	juv				Nematocera	Nematocera	Nematocera		1.3	neutral
107	2015.05.09.	2015	5	Spring	Szabolcs-Szatmár-Bereg	SSB_Orchard_1_Újfehértó	Philodromidae	Philodromus cespitum	Ph_cespitum	juv				Brachycera	Brachycera	Brachycera		1.4	neutral
108	2015.05.09.	2015	5	Spring	Szabolcs-Szatmár-Bereg	SSB_Orchard_1_Újfehértó	Philodromidae	Philodromus cespitum	Ph_cespitum	juv				Brachycera	Brachycera	Brachycera		1.1	neutral
109	2015.05.09.	2015	5	Spring	Szabolcs-Szatmár-Bereg	SSB_Orchard_1_Újfehértó	Philodromidae	Philodromus cespitum	Ph_cespitum	juv				Nematocera	Nematocera	Nematocera		1.2	neutral
110	2015.05.09.	2015	5	Spring	Szabolcs-Szatmár-Bereg	SSB_Orchard_1_Újfehértó	Philodromidae	Philodromus cespitum	Ph_cespitum	juv				Nematocera	Nematocera	Nematocera		0.7	neutral
111	2015.05.09.	2015	5	Spring	Szabolcs-Szatmár-Bereg	SSB_Orchard_1_Újfehértó	Philodromidae	Philodromus cespitum	Ph_cespitum	juv				Nematocera	Nematocera	Nematocera		1.1	neutral
112	2015.05.09.	2015	5	Spring	Szabolcs-Szatmár-Bereg	SSB_Orchard_1_Újfehértó	Philodromidae	Philodromus cespitum	Ph_cespitum	juv				Nematocera	Nematocera	Nematocera		1.3	neutral
113	2015.05.09.	2015	5	Spring	Szabolcs-Szatmár-Bereg	SSB_Orchard_1_Újfehértó	Philodromidae	Philodromus cespitum	Ph_cespitum	juv				Nematocera	Nematocera	Nematocera		1.4	neutral
114	2015.05.09.	2015	5	Spring	Szabolcs-Szatmár-Bereg	SSB_Orchard_1_Újfehértó	Philodromidae	Philodromus cespitum	Ph_cespitum	juv				Nematocera	Nematocera	Nematocera		1.2	neutral
115	2015.05.09.	2015	5	Spring	Szabolcs-Szatmár-Bereg	SSB_Orchard_1_Újfehértó	Philodromidae	Philodromus cespitum	Ph_cespitum	juv				Nematocera	Nematocera	Nematocera	Bibio sp.	2.1	neutral	B. cf. hortulanus
116	2015.05.09.	2015	5	Spring	Szabolcs-Szatmár-Bereg	SSB_Orchard_1_Újfehértó	Philodromidae	Philodromus cespitum	Ph_cespitum	juv				Nematocera	Nematocera	Nematocera			neutral
117	2015.05.09.	2015	5	Spring	Szabolcs-Szatmár-Bereg	SSB_Orchard_1_Újfehértó	Philodromidae	Philodromus cespitum	Ph_cespitum	juv				Nematocera	Nematocera	Nematocera		1.1	neutral
118	2015.05.09.	2015	5	Spring	Szabolcs-Szatmár-Bereg	SSB_Orchard_1_Újfehértó	Philodromidae	Philodromus cespitum	Ph_cespitum	juv				Nematocera	Nematocera	Nematocera		0.9	neutral
119	2015.05.09.	2015	5	Spring	Szabolcs-Szatmár-Bereg	SSB_Orchard_1_Újfehértó	Philodromidae	Philodromus cespitum	Ph_cespitum	juv				Nematocera	Nematocera	Nematocera		1.3	neutral
120	2015.05.09.	2015	5	Spring	Szabolcs-Szatmár-Bereg	SSB_Orchard_1_Újfehértó	Philodromidae	Philodromus cespitum	Ph_cespitum	juv				Nematocera	Nematocera	Nematocera		0.5	neutral
121	2015.05.09.	2015	5	Spring	Szabolcs-Szatmár-Bereg	SSB_Orchard_1_Újfehértó	Philodromidae	Philodromus cespitum	Ph_cespitum	juv				Araneae	Araneae	Philodromidae	Philodromus sp.	1.2	natural_enemy	juvenile
122	2015.05.09.	2015	5	Spring	Szabolcs-Szatmár-Bereg	SSB_Orchard_1_Újfehértó	Philodromidae	Philodromus cespitum	Ph_cespitum	subadult	Male			Nematocera	Nematocera	Nematocera		1.5	neutral
123	2015.05.09.	2015	5	Spring	Szabolcs-Szatmár-Bereg	SSB_Orchard_1_Újfehértó	Philodromidae	Philodromus cespitum	Ph_cespitum	subadult	Male			Nematocera	Nematocera	Nematocera		1.3	neutral
124	2015.05.09.	2015	5	Spring	Szabolcs-Szatmár-Bereg	SSB_Orchard_1_Újfehértó	Philodromidae	Philodromus cespitum	Ph_cespitum	subadult	Male			Nematocera	Nematocera	Nematocera		1.4	neutral
125	2015.05.09.	2015	5	Spring	Szabolcs-Szatmár-Bereg	SSB_Orchard_1_Újfehértó	Philodromidae	Philodromus cespitum	Ph_cespitum	subadult	Male			Nematocera	Nematocera	Nematocera		1.3	neutral
126	2015.05.09.	2015	5	Spring	Szabolcs-Szatmár-Bereg	SSB_Orchard_1_Újfehértó	Philodromidae	Philodromus cespitum	Ph_cespitum	subadult	Male			Nematocera	Nematocera	Nematocera		1.4	neutral
127	2015.05.09.	2015	5	Spring	Szabolcs-Szatmár-Bereg	SSB_Orchard_1_Újfehértó	Philodromidae	Philodromus cespitum	Ph_cespitum	subadult	Male			Nematocera	Nematocera	Nematocera		1.1	neutral
128	2015.05.09.	2015	5	Spring	Szabolcs-Szatmár-Bereg	SSB_Orchard_1_Újfehértó	Philodromidae	Philodromus cespitum	Ph_cespitum	subadult	Male			Nematocera	Nematocera	Nematocera		1.4	neutral
129	2015.05.09.	2015	5	Spring	Szabolcs-Szatmár-Bereg	SSB_Orchard_1_Újfehértó	Philodromidae	Philodromus cespitum	Ph_cespitum	subadult	Male			Nematocera	Nematocera	Nematocera		0.4	neutral
130	2015.05.09.	2015	5	Spring	Szabolcs-Szatmár-Bereg	SSB_Orchard_1_Újfehértó	Philodromidae	Philodromus cespitum	Ph_cespitum	subadult	Female			Nematocera	Nematocera	Nematocera	Bibio sp.	1.8	neutral
131	2015.05.09.	2015	5	Spring	Szabolcs-Szatmár-Bereg	SSB_Orchard_1_Újfehértó	Philodromidae	Philodromus rufus		juv				Nematocera	Nematocera	Nematocera		1.4	neutral
132	2015.05.09.	2015	5	Spring	Szabolcs-Szatmár-Bereg	SSB_Orchard_1_Újfehértó	Salticidae	Heliophanus auratus	Other_salticids	subadult	Female			Brachycera	Brachycera	Brachycera		1.2	neutral
133	2015.05.09.	2015	5	Spring	Szabolcs-Szatmár-Bereg	SSB_Orchard_1_Újfehértó	Salticidae	Heliophanus auratus	Other_salticids	adult	Female			Nematocera	Nematocera	Nematocera			neutral
134	2015.05.09.	2015	5	Spring	Szabolcs-Szatmár-Bereg	SSB_Orchard_1_Újfehértó	Thomisidae	Ebrechtella tricuspidata	E_tricuspidata	juv				Nematocera	Nematocera	Nematocera		1.2	neutral
135	2015.05.19.	2015	5	Spring	Pest	P_Orchard_8	Philodromidae	Philodromus sp.		juv		1.6	0.4375	Sternorrhyncha	Sternorrhyncha	Aphididae		0.7	pest
136	2015.05.21.	2015	5	Spring	Szabolcs-Szatmár-Bereg	SSB_Orchard_1_Újfehértó	Philodromidae	Philodromus cespitum	Ph_cespitum	juv				Nematocera	Nematocera	Nematocera		0.8	neutral
137	2015.05.21.	2015	5	Spring	Szabolcs-Szatmár-Bereg	SSB_Orchard_1_Újfehértó	Philodromidae	Philodromus cespitum	Ph_cespitum	juv				Nematocera	Nematocera	Nematocera		0.3	neutral
138	2015.05.21.	2015	5	Spring	Szabolcs-Szatmár-Bereg	SSB_Orchard_1_Újfehértó	Philodromidae	Philodromus cespitum	Ph_cespitum	juv				Sternorrhyncha	Sternorrhyncha	Aphididae		0.8	pest
139	2015.05.21.	2015	5	Spring	Szabolcs-Szatmár-Bereg	SSB_Orchard_1_Újfehértó	Philodromidae	Philodromus cespitum	Ph_cespitum	juv				Brachycera	Brachycera	Brachycera		1.6	neutral
140	2015.05.21.	2015	5	Spring	Szabolcs-Szatmár-Bereg	SSB_Orchard_1_Újfehértó	Philodromidae	Philodromus cespitum	Ph_cespitum	adult	Female			Sternorrhyncha	Sternorrhyncha	Aphididae		0.6	pest
141	2015.05.23.	2015	5	Spring	Szabolcs-Szatmár-Bereg	SSB_Orchard_1_Újfehértó	Philodromidae	Philodromus cespitum	Ph_cespitum	subadult	Female	2.1	0.761905	Brachycera	Brachycera	Brachycera		1.6	neutral
142	2015.05.23.	2015	5	Spring	Szabolcs-Szatmár-Bereg	SSB_Orchard_1_Újfehértó	Philodromidae	Philodromus cespitum	Ph_cespitum	adult	Female	2.4	0.791667	Nematocera	Nematocera	Nematocera	Bibio sp.	1.9	neutral
143	2015.05.23.	2015	5	Spring	Szabolcs-Szatmár-Bereg	SSB_Orchard_1_Újfehértó	Philodromidae	Philodromus cespitum	Ph_cespitum	adult	Female	2.5	0.16	Sternorrhyncha	Sternorrhyncha	Aphididae		0.4	pest
144	2015.05.23.	2015	5	Spring	Szabolcs-Szatmár-Bereg	SSB_Orchard_1_Újfehértó	Philodromidae	Philodromus cespitum	Ph_cespitum	adult	Female	2.2	0.727273	Nematocera	Nematocera	Nematocera	Tipulomorpha sp.	1.6	neutral
145	2015.05.23.	2015	5	Spring	Szabolcs-Szatmár-Bereg	SSB_Orchard_1_Újfehértó	Thomisidae	Ebrechtella tricuspidata	E_tricuspidata	subadult	Female	2.2	0.772727	Brachycera	Brachycera	Brachycera		1.7	neutral
146	2015.05.23.	2015	5	Spring	Szabolcs-Szatmár-Bereg	SSB_Orchard_1_Újfehértó	Philodromidae	Philodromus cespitum	Ph_cespitum	adult	Female			Sternorrhyncha	Sternorrhyncha	Aphididae	Dysaphis plantaginea		pest	imago
147	2015.05.23.	2015	5	Spring	Szabolcs-Szatmár-Bereg	SSB_Orchard_1_Újfehértó	Philodromidae	Philodromus cespitum	Ph_cespitum	adult	Female			Sternorrhyncha	Sternorrhyncha	Aphididae	Dysaphis plantaginea		pest	larva, L2
148	2015.05.23.	2015	5	Spring	Szabolcs-Szatmár-Bereg	SSB_Orchard_1_Újfehértó	Philodromidae	Philodromus cespitum	Ph_cespitum	juv				Sternorrhyncha	Sternorrhyncha	Aphididae	Dysaphis plantaginea		pest	larva, L3
149	2015.05.23.	2015	5	Spring	Szabolcs-Szatmár-Bereg	SSB_Orchard_1_Újfehértó	Philodromidae	Philodromus cespitum	Ph_cespitum	juv				Sternorrhyncha	Sternorrhyncha	Aphididae	Dysaphis plantaginea		pest	larva, L3
150	2015.05.23.	2015	5	Spring	Szabolcs-Szatmár-Bereg	SSB_Orchard_1_Újfehértó	Philodromidae	Philodromus cespitum	Ph_cespitum	adult	Female			Sternorrhyncha	Sternorrhyncha	Aphididae	Dysaphis plantaginea		pest	imago
151	2015.05.23.	2015	5	Spring	Szabolcs-Szatmár-Bereg	SSB_Orchard_1_Újfehértó	Philodromidae	Philodromus cespitum	Ph_cespitum	adult	Male			Nematocera	Nematocera	Nematocera			neutral
152	2015.05.30.	2015	5	Spring	Szabolcs-Szatmár-Bereg	SSB_Orchard_1_Újfehértó	Philodromidae	Philodromus cespitum	Ph_cespitum	subadult	Female			Brachycera	Brachycera	Brachycera		1.1	neutral
153	2015.05.30.	2015	5	Spring	Szabolcs-Szatmár-Bereg	SSB_Orchard_1_Újfehértó	Philodromidae	Philodromus cespitum	Ph_cespitum	subadult	Female			Brachycera	Brachycera	Brachycera		1.1	neutral
154	2015.05.30.	2015	5	Spring	Szabolcs-Szatmár-Bereg	SSB_Orchard_1_Újfehértó	Philodromidae	Philodromus cespitum	Ph_cespitum	adult	Female			Brachycera	Brachycera	Brachycera		1.4	neutral
155	2015.06.01.	2015	6	Summer	Szabolcs-Szatmár-Bereg	SSB_Orchard_2	Oxyopidae	Oxyopes ramosus		adult	Female	2.4	1.20833	Brachycera	Brachycera	Syrphidae	Syrphidae sp.	2.9	natural_enemy	imago
156	2015.06.01.	2015	6	Summer	Szabolcs-Szatmár-Bereg	SSB_Orchard_2	Philodromidae	Philodromus cf. cespitum	Ph_cespitum	juv		1.5	0.333333	Sternorrhyncha	Sternorrhyncha	Aphididae	Dysaphis plantaginea	0.5	pest
157	2015.06.01.	2015	6	Summer	Szabolcs-Szatmár-Bereg	SSB_Orchard_6	Philodromidae	Philodromus cf. cespitum	Ph_cespitum	subadult	Male	1.7	0.941176	Brachycera	Brachycera	Brachycera		1.6	neutral
158	2015.06.01.	2015	6	Summer	Szabolcs-Szatmár-Bereg	SSB_Orchard_6	Philodromidae	Philodromus cf. cespitum	Ph_cespitum	subadult	Male	1.9	0.473684	Nematocera	Nematocera	Nematocera		0.9	neutral
159	2015.06.01.	2015	6	Summer	Szabolcs-Szatmár-Bereg	SSB_Orchard_6	Philodromidae	Philodromus cf. cespitum	Ph_cespitum	subadult	Female	2	0.45	Brachycera	Brachycera	Brachycera		0.9	neutral
160	2015.06.17.	2015	6	Summer	Szabolcs-Szatmár-Bereg	SSB_Orchard_2	Philodromidae	Philodromus cf. cespitum	Ph_cespitum	juv		1	0.6	Sternorrhyncha	Sternorrhyncha	Aphididae	Aphis pomi	0.6	pest
161	2015.06.17.	2015	6	Summer	Szabolcs-Szatmár-Bereg	SSB_Orchard_2	Philodromidae	Philodromus cf. cespitum	Ph_cespitum	subadult	Male	1.4	0.785714	Brachycera	Brachycera	Brachycera		1.1	neutral
162	2015.06.17.	2015	6	Summer	Szabolcs-Szatmár-Bereg	SSB_Orchard_6	Philodromidae	Philodromus cespitum	Ph_cespitum	adult	Female	1.9	0.789474	Brachycera	Brachycera	Brachycera		1.5	neutral
163	2015.06.17.	2015	6	Summer	Szabolcs-Szatmár-Bereg	SSB_Orchard_3	Thomisidae	Misumena vatia		adult	Male	1.3	1.07692	Brachycera	Brachycera	Brachycera		1.4	neutral
164	2015.06.17.	2015	6	Summer	Szabolcs-Szatmár-Bereg	SSB_Orchard_3	Philodromidae	Philodromus cespitum	Ph_cespitum	adult	Female	1.9	0.842105	Brachycera	Brachycera	Brachycera		1.6	neutral
165	2015.06.22.	2015	6	Summer	Szabolcs-Szatmár-Bereg	SSB_Orchard_1_Újfehértó	Philodromidae	Philodromus cespitum	Ph_cespitum	adult	Female			Brachycera	Brachycera	Brachycera		1.4	neutral
166	2015.06.22.	2015	6	Summer	Szabolcs-Szatmár-Bereg	SSB_Orchard_1_Újfehértó	Philodromidae	Philodromus cespitum	Ph_cespitum	adult	Female			Brachycera	Brachycera	Brachycera		1.6	neutral
167	2015.06.22.	2015	6	Summer	Szabolcs-Szatmár-Bereg	SSB_Orchard_1_Újfehértó	Philodromidae	Philodromus cespitum	Ph_cespitum	adult	Female			Nematocera	Nematocera	Nematocera		0.6	neutral
168	2015.06.22.	2015	6	Summer	Szabolcs-Szatmár-Bereg	SSB_Orchard_1_Újfehértó	Philodromidae	Philodromus cespitum	Ph_cespitum	adult	Female			Brachycera	Brachycera	Brachycera		1.8	neutral
169	2015.06.22.	2015	6	Summer	Szabolcs-Szatmár-Bereg	SSB_Orchard_1_Újfehértó	Philodromidae	Philodromus cespitum	Ph_cespitum	adult	Female			Brachycera	Brachycera	Brachycera		2.9	neutral
170	2015.06.22.	2015	6	Summer	Szabolcs-Szatmár-Bereg	SSB_Orchard_1_Újfehértó	Salticidae	Marpissa muscosa	Other_salticids	juv				Brachycera	Brachycera	Brachycera		1.5	neutral
171	2015.06.26.	2015	6	Summer	Szabolcs-Szatmár-Bereg	SSB_Orchard_1_Újfehértó	Salticidae	Carrhotus xanthogramma	C_xanthogramma	juv		1.1	0.454545	Nematocera	Nematocera	Nematocera		0.5	neutral
172	2015.06.30.	2015	6	Summer	Szabolcs-Szatmár-Bereg	SSB_Orchard_5	Philodromidae	Philodromus cespitum	Ph_cespitum	adult	Female	2.1	0.333333	Heteroptera	Heteroptera	Miridae	Pilophorus perplexus	0.7	natural_enemy
173	2015.06.30.	2015	6	Summer	Szabolcs-Szatmár-Bereg	SSB_Orchard_5	Oxyopidae	Oxyopes sp.		juv		0.8	0.75	Brachycera	Brachycera	Brachycera		0.6	neutral
174	2015.06.30.	2015	6	Summer	Szabolcs-Szatmár-Bereg	SSB_Orchard_5	Thomisidae	Xysticus sp.	Xysticus	juv		1.1	0.454545	Formicidae	Formicidae	Formicidae		0.5	neutral	worker
175	2015.06.30.	2015	6	Summer	Szabolcs-Szatmár-Bereg	SSB_Orchard_2	Thomisidae	Xysticus sp.	Xysticus	juv		0.9	2.22222	Formicidae	Formicidae	Formicidae	Lasius niger	2	neutral	queen
176	2015.06.30.	2015	6	Summer	Szabolcs-Szatmár-Bereg	SSB_Orchard_2	Philodromidae	Philodromus cespitum	Ph_cespitum	adult	Female	1.7	0.294118	Sternorrhyncha	Sternorrhyncha	Aphididae	Aphis pomi	0.5	pest
177	2015.06.30.	2015	6	Summer	Szabolcs-Szatmár-Bereg	SSB_Orchard_2	Philodromidae	Philodromus cf. cespitum	Ph_cespitum	subadult	Female			Sternorrhyncha	Sternorrhyncha	Aphididae	Aphis pomi		pest
178	2015.06.30.	2015	6	Summer	Szabolcs-Szatmár-Bereg	SSB_Orchard_1_Újfehértó	Philodromidae	Philodromus cespitum	Ph_cespitum	adult	Female	2.1	0.52381	Auchenorrhyncha	Auchenorrhyncha	Flatidae	Metcalfa pruinosa	1.1	pest	larva
179	2015.06.30.	2015	6	Summer	Szabolcs-Szatmár-Bereg	SSB_Orchard_1_Újfehértó	Thomisidae	Misumena vatia		adult	Female	2.9	0.482759	Brachycera	Brachycera	Brachycera		1.4	neutral
180	2015.06.30.	2015	6	Summer	Szabolcs-Szatmár-Bereg	SSB_Orchard_1_Újfehértó	Thomisidae	Ebrechtella tricuspidata	E_tricuspidata	subadult	Female	2	0.7	Nematocera	Nematocera	Nematocera		1.4	neutral
181	2015.06.30.	2015	6	Summer	Szabolcs-Szatmár-Bereg	SSB_Orchard_1_Újfehértó	Salticidae	Carrhotus xanthogramma	C_xanthogramma	juv		1.1	0.636364	Heteroptera	Heteroptera			0.7	neutral
182	2015.06.05.	2015	6	Summer	Szabolcs-Szatmár-Bereg	SSB_Orchard_1_Újfehértó	Philodromidae	Philodromus cf. cespitum	Ph_cespitum	juv		1.4	1	Brachycera	Brachycera	Brachycera		1.4	neutral
183	2015.09.10.	2015	9	Fall	Pest	P_Orchard_2	Thomisidae	Xysticus sp.	Xysticus	subadult	Female	1.9	0.210526	Araneae	Araneae			0.4	natural_enemy
184	2015.09.22.	2015	9	Fall	Szabolcs-Szatmár-Bereg	SSB_Orchard_1_Újfehértó	Salticidae	Heliophanus auratus	Other_salticids	subadult	Female			Sternorrhyncha	Sternorrhyncha	Aphididae	Aphis pomi		pest
185	2015.09.22.	2015	9	Fall	Szabolcs-Szatmár-Bereg	SSB_Orchard_2	Thomisidae	Tmarus piger		subadult	Female	1.7	0.470588	Formicidae	Formicidae	Formicidae		0.8	neutral	worker
186	2015.09.22.	2015	9	Fall	Szabolcs-Szatmár-Bereg	SSB_Orchard_5	Oxyopidae	Oxyopes ramosus		subadult	Female	1.7	0.352941	Formicidae	Formicidae	Formicidae		0.6	neutral	worker
187	2015.09.22.	2015	9	Fall	Szabolcs-Szatmár-Bereg	SSB_Orchard_3	Salticidae	Carrhotus xanthogramma	C_xanthogramma	subadult	Female	2.2	0.409091	Nematocera	Nematocera	Nematocera		0.9	neutral
188	2015.09.24.	2015	9	Fall	Szabolcs-Szatmár-Bereg	SSB_Orchard_2	Thomisidae	Xysticus sp.	Xysticus	juv		1	0.9	Heteroptera	Heteroptera	Tingidae	Stephanitis pyri	0.9	pest
189	2015.09.24.	2015	9	Fall	Szabolcs-Szatmár-Bereg	SSB_Orchard_1_Újfehértó	Thomisidae	Xysticus sp.	Xysticus	juv		2	0.45	Coleoptera	Coleoptera	Coccinellidae	Stethorus sp.	0.9	natural_enemy
190	2015.10.01.	2015	10	Fall	Bács-Kiskun	BK_Orchard_1	Thomisidae	Tmarus piger		subadult	Male	1.8	0.444444	Formicidae	Formicidae	Formicidae		0.8	neutral	worker
191	2015.10.01.	2015	10	Fall	Bács-Kiskun	BK_Orchard_1	Philodromidae	Philodromus sp.		juv		1.3	0.615385	Brachycera	Brachycera	Brachycera		0.8	neutral
192	2015.10.01.	2015	10	Fall	Bács-Kiskun	BK_Orchard_1	Philodromidae	Philodromus sp.		juv		0.8	0.75	Nematocera	Nematocera	Nematocera		0.6	neutral
193	2016.03.30.	2016	3	Spring	Szabolcs-Szatmár-Bereg	SSB_Orchard_1_Újfehértó	Oxyopidae	Oxyopes ramosus		juv		1.6	0.4375	Formicidae	Formicidae	Formicidae		0.7	neutral	worker
194	2016.03.30.	2016	3	Spring	Szabolcs-Szatmár-Bereg	SSB_Orchard_1_Újfehértó	Oxyopidae	Oxyopes sp.		juv				Sternorrhyncha	Sternorrhyncha	Psyllidae		0.7	pest	imago
195	2016.04.01.	2016	4	Spring	Szabolcs-Szatmár-Bereg	SSB_Orchard_1_Újfehértó	Salticidae	Salticus scenicus	Other_salticids	juv		1.1	0.545455	Sternorrhyncha	Sternorrhyncha	Psyllidae		0.6	pest	imago
196	2016.04.01.	2016	4	Spring	Szabolcs-Szatmár-Bereg	SSB_Orchard_1_Újfehértó	Salticidae	Salticus scenicus	Other_salticids	subadult	Male	1.2	0.583333	Sternorrhyncha	Sternorrhyncha	Psyllidae		0.7	pest	imago
197	2016.04.02.	2016	4	Spring	Szabolcs-Szatmár-Bereg	SSB_Orchard_1_Újfehértó	Salticidae	Salticus scenicus	Other_salticids	subadult	Male	1.2	1.41667	Nematocera	Nematocera	Nematocera		1.7	neutral
198	2016.04.16.	2016	4	Spring	Szabolcs-Szatmár-Bereg	SSB_Orchard_1_Újfehértó	Philodromidae	Philodromus cespitum	Ph_cespitum	juv				Nematocera	Nematocera	Nematocera	Bibio sp.		neutral
199	2016.04.16.	2016	4	Spring	Szabolcs-Szatmár-Bereg	SSB_Orchard_1_Újfehértó	Thomisidae	Misumena vatia		adult	Female	2.8	1.39286	Other Hymenoptera	Other Hymenoptera	Apidae	Apis mellifera	3.9	neutral
200	2016.04.16.	2016	4	Spring	Szabolcs-Szatmár-Bereg	SSB_Orchard_1_Újfehértó	Thomisidae	Ebrechtella tricuspidata	E_tricuspidata	juv		1.5	0.8	Araneae	Araneae	Salticidae	Heliophanus auratus	1.2	natural_enemy	subadult female
201	2016.04.16.	2016	4	Spring	Szabolcs-Szatmár-Bereg	SSB_Orchard_1_Újfehértó	Thomisidae	Misumena vatia		juv		0.9	1.11111	Nematocera	Nematocera	Nematocera		1	neutral
202	2016.04.16.	2016	4	Spring	Szabolcs-Szatmár-Bereg	SSB_Orchard_1_Újfehértó	Thomisidae	Ebrechtella tricuspidata	E_tricuspidata	adult	Male	1.7	0.823529	Brachycera	Brachycera	Brachycera		1.4	neutral
203	2016.04.16.	2016	4	Spring	Szabolcs-Szatmár-Bereg	SSB_Orchard_1_Újfehértó	Thomisidae	Ebrechtella tricuspidata	E_tricuspidata	subadult	Female	1.8	0.888889	Coleoptera	Coleoptera	Curculionidae	Phyllobius sp.	1.6	pest	P. cf. oblongus
204	2016.04.16.	2016	4	Spring	Szabolcs-Szatmár-Bereg	SSB_Orchard_1_Újfehértó	Thomisidae	Xysticus ulmi	Xysticus	adult	Female	2.3	0.608696	Coleoptera	Coleoptera	Curculionidae	Phyllobius sp.	1.4	pest	P. cf. oblongus
205	2016.04.16.	2016	4	Spring	Szabolcs-Szatmár-Bereg	SSB_Orchard_1_Újfehértó	Thomisidae	Misumena vatia		juv		1.8	1	Nematocera	Nematocera	Nematocera	Bibio sp.	1.8	neutral
206	2016.04.16.	2016	4	Spring	Szabolcs-Szatmár-Bereg	SSB_Orchard_1_Újfehértó	Thomisidae	Xysticus cristatus	Xysticus	adult	Female	2.3	0.826087	Coleoptera	Coleoptera	Curculionidae	Phyllobius sp.	1.9	pest	P. cf. oblongus
207	2016.04.16.	2016	4	Spring	Szabolcs-Szatmár-Bereg	SSB_Orchard_1_Újfehértó	Thomisidae	Xysticus ulmi	Xysticus	adult	Female	2.2	0.227273	Formicidae	Formicidae	Formicidae		0.5	neutral	worker
208	2016.04.16.	2016	4	Spring	Szabolcs-Szatmár-Bereg	SSB_Orchard_1_Újfehértó	Thomisidae	Xysticus ulmi	Xysticus	adult	Female	2.3	0.565217	Coleoptera	Coleoptera			1.3	neutral
209	2016.04.16.	2016	4	Spring	Szabolcs-Szatmár-Bereg	SSB_Orchard_1_Újfehértó	Thomisidae	Ebrechtella tricuspidata	E_tricuspidata	adult	Male	2	0.8	Nematocera	Nematocera	Nematocera	Bibio sp.	1.6	neutral	B. cf. hortulanus
210	2016.04.16.	2016	4	Spring	Szabolcs-Szatmár-Bereg	SSB_Orchard_1_Újfehértó	Thomisidae	Xysticus ulmi	Xysticus	adult	Female	2.3	0.26087	Formicidae	Formicidae	Formicidae		0.6	neutral	worker
211	2016.04.16.	2016	4	Spring	Szabolcs-Szatmár-Bereg	SSB_Orchard_1_Újfehértó	Thomisidae	Xysticus sp.	Xysticus	adult	Male			Coleoptera	Coleoptera	Curculionidae	Phyllobius sp.	1.6	pest	P. cf. oblongus
212	2016.04.16.	2016	4	Spring	Szabolcs-Szatmár-Bereg	SSB_Orchard_1_Újfehértó	Thomisidae	Ebrechtella tricuspidata	E_tricuspidata	juv				Brachycera	Brachycera	Brachycera		1.4	neutral
213	2016.04.16.	2016	4	Spring	Szabolcs-Szatmár-Bereg	SSB_Orchard_1_Újfehértó	Thomisidae	Ebrechtella tricuspidata	E_tricuspidata	juv				Lepidoptera	Lepidoptera	Gracillariidae	Phyllonorycter blancardella	0.8	pest	imago
214	2016.04.16.	2016	4	Spring	Szabolcs-Szatmár-Bereg	SSB_Orchard_1_Újfehértó	Cheiracanthiidae	Cheiracanthium sp.		juv		1.4	0.285714	Lepidoptera	Lepidoptera	Tortricidae		0.4	pest	larva
215	2016.04.16.	2016	4	Spring	Szabolcs-Szatmár-Bereg	SSB_Orchard_1_Újfehértó	Clubionidae	Clubiona sp.	Clubiona	subadult	Male			Sternorrhyncha	Sternorrhyncha	Aphididae		0.3	pest	larva, L1-2
216	2016.04.16.	2016	4	Spring	Szabolcs-Szatmár-Bereg	SSB_Orchard_1_Újfehértó	Salticidae	Carrhotus xanthogramma	C_xanthogramma	adult	Male	2.2	0.636364	Brachycera	Brachycera	Brachycera		1.4	neutral
217	2016.04.16.	2016	4	Spring	Szabolcs-Szatmár-Bereg	SSB_Orchard_1_Újfehértó	Salticidae	Carrhotus xanthogramma	C_xanthogramma	adult	Male	2.5	1	Nematocera	Nematocera	Nematocera	Bibio sp.	2.5	neutral
218	2016.04.16.	2016	4	Spring	Szabolcs-Szatmár-Bereg	SSB_Orchard_1_Újfehértó	Salticidae	Carrhotus xanthogramma	C_xanthogramma	subadult	Female	2.1	1.04762	Nematocera	Nematocera	Nematocera	Bibio sp.	2.2	neutral
219	2016.04.16.	2016	4	Spring	Szabolcs-Szatmár-Bereg	SSB_Orchard_1_Újfehértó	Salticidae	Carrhotus xanthogramma	C_xanthogramma	adult	Male	2.6		Sternorrhyncha	Sternorrhyncha	Psyllidae			pest	imago
220	2016.04.16.	2016	4	Spring	Szabolcs-Szatmár-Bereg	SSB_Orchard_1_Újfehértó	Salticidae	Pseudicius encarpatus	Other_salticids	juv		1.1		Nematocera	Nematocera	Nematocera	Bibio sp.		neutral
221	2016.04.16.	2016	4	Spring	Szabolcs-Szatmár-Bereg	SSB_Orchard_1_Újfehértó	Philodromidae	Philodromus cespitum	Ph_cespitum	juv		1.1	0.272727	Sternorrhyncha	Sternorrhyncha	Aphididae		0.3	pest	larva, L1-2
222	2016.04.16.	2016	4	Spring	Szabolcs-Szatmár-Bereg	SSB_Orchard_1_Újfehértó	Philodromidae	Philodromus cespitum	Ph_cespitum	juv		1.8	0.555556	Nematocera	Nematocera	Nematocera		1	neutral
223	2016.04.16.	2016	4	Spring	Szabolcs-Szatmár-Bereg	SSB_Orchard_1_Újfehértó	Philodromidae	Philodromus cespitum	Ph_cespitum	juv		1.2	0.333333	Nematocera	Nematocera	Nematocera		0.4	neutral
224	2016.04.16.	2016	4	Spring	Szabolcs-Szatmár-Bereg	SSB_Orchard_1_Újfehértó	Philodromidae	Philodromus cespitum	Ph_cespitum	subadult	Female	1.7	0.294118	Nematocera	Nematocera	Nematocera		0.5	neutral
225	2016.04.16.	2016	4	Spring	Szabolcs-Szatmár-Bereg	SSB_Orchard_1_Újfehértó	Philodromidae	Philodromus cespitum	Ph_cespitum	subadult	Female	1.6	1.5625	Nematocera	Nematocera	Nematocera	Bibio sp.	2.5	neutral
226	2016.04.16.	2016	4	Spring	Szabolcs-Szatmár-Bereg	SSB_Orchard_1_Újfehértó	Philodromidae	Philodromus cespitum	Ph_cespitum	juv		1.2	2	Nematocera	Nematocera	Nematocera	Bibio sp.	2.4	neutral
227	2016.04.16.	2016	4	Spring	Szabolcs-Szatmár-Bereg	SSB_Orchard_1_Újfehértó	Philodromidae	Philodromus cespitum	Ph_cespitum	juv		1.2	1.5	Nematocera	Nematocera	Nematocera		1.8	neutral
228	2016.04.16.	2016	4	Spring	Szabolcs-Szatmár-Bereg	SSB_Orchard_1_Újfehértó	Philodromidae	Philodromus cespitum	Ph_cespitum	juv		1.2	0.583333	Nematocera	Nematocera	Nematocera		0.7	neutral
229	2016.04.16.	2016	4	Spring	Szabolcs-Szatmár-Bereg	SSB_Orchard_1_Újfehértó	Philodromidae	Philodromus cespitum	Ph_cespitum	juv		1.3	0.307692	Nematocera	Nematocera	Nematocera		0.4	neutral
230	2016.04.16.	2016	4	Spring	Szabolcs-Szatmár-Bereg	SSB_Orchard_1_Újfehértó	Philodromidae	Philodromus cespitum	Ph_cespitum	juv		0.9	0.333333	Nematocera	Nematocera	Nematocera		0.3	neutral
231	2016.04.16.	2016	4	Spring	Szabolcs-Szatmár-Bereg	SSB_Orchard_1_Újfehértó	Philodromidae	Philodromus cespitum	Ph_cespitum	juv		1.1	0.363636	Nematocera	Nematocera	Nematocera		0.4	neutral
232	2016.04.16.	2016	4	Spring	Szabolcs-Szatmár-Bereg	SSB_Orchard_1_Újfehértó	Philodromidae	Philodromus cespitum	Ph_cespitum	juv				Nematocera	Nematocera	Nematocera		1	neutral
233	2016.04.16.	2016	4	Spring	Szabolcs-Szatmár-Bereg	SSB_Orchard_1_Újfehértó	Philodromidae	Philodromus rufus		subadult	Male	1.4	0.357143	Nematocera	Nematocera	Nematocera		0.5	neutral
234	2016.04.16.	2016	4	Spring	Szabolcs-Szatmár-Bereg	SSB_Orchard_1_Újfehértó	Philodromidae	Tibellus oblongus		subadult	Female	2.2	0.272727	Nematocera	Nematocera	Nematocera		0.6	neutral
235	2016.04.15.	2016	4	Spring	Pest	P_Orchard_4	Philodromidae	Philodromus sp.		subadult	Male	1.1	0.454545	Nematocera	Nematocera	Nematocera		0.5	neutral
236	2016.04.17.	2016	4	Spring	Szabolcs-Szatmár-Bereg	SSB_Orchard_1_Újfehértó	Philodromidae	Philodromus cespitum	Ph_cespitum	juv				Sternorrhyncha	Sternorrhyncha	Aphididae	Dysaphis plantaginea	0.5	pest
237	2016.04.17.	2016	4	Spring	Szabolcs-Szatmár-Bereg	SSB_Orchard_1_Újfehértó	Philodromidae	Philodromus cespitum	Ph_cespitum	juv				Sternorrhyncha	Sternorrhyncha	Aphididae	Dysaphis plantaginea	0.5	pest
238	2016.04.18.	2016	4	Spring	Szabolcs-Szatmár-Bereg	SSB_Orchard_1_Újfehértó	Philodromidae	Philodromus cespitum	Ph_cespitum	juv				Sternorrhyncha	Sternorrhyncha	Aphididae	Dysaphis plantaginea	0.6	pest
239	2016.04.18.	2016	4	Spring	Szabolcs-Szatmár-Bereg	SSB_Orchard_1_Újfehértó	Philodromidae	Philodromus cespitum	Ph_cespitum	juv				Sternorrhyncha	Sternorrhyncha	Aphididae	Dysaphis plantaginea	0.9	pest
240	2016.04.21.	2016	4	Spring	Szabolcs-Szatmár-Bereg	SSB_Orchard_1_Újfehértó	Clubionidae	Clubiona sp.	Clubiona	juv				Nematocera	Nematocera	Nematocera		0.7	neutral
241	2016.04.23.	2016	4	Spring	Szabolcs-Szatmár-Bereg	SSB_Orchard_1_Újfehértó	Thomisidae	Misumena vatia		juv				Formicidae	Formicidae	Formicidae		0.6	neutral	worker
242	2016.05.01.	2016	5	Spring	Szabolcs-Szatmár-Bereg	SSB_Orchard_1_Újfehértó	Salticidae	Heliophanus cupreus	Other_salticids	adult	Female			Brachycera	Brachycera	Brachycera		1.5	neutral
243	2016.05.03.	2016	5	Spring	Szabolcs-Szatmár-Bereg	SSB_Orchard_1_Újfehértó	Philodromidae	Philodromus cespitum	Ph_cespitum	juv				Nematocera	Nematocera	Nematocera		0.3	neutral
244	2016.05.03.	2016	5	Spring	Szabolcs-Szatmár-Bereg	SSB_Orchard_1_Újfehértó	Philodromidae	Philodromus cespitum	Ph_cespitum	juv				Brachycera	Brachycera	Brachycera		1.5	neutral
245	2016.05.04.	2016	5	Spring	Szabolcs-Szatmár-Bereg	SSB_Orchard_1_Újfehértó	Philodromidae	Philodromus cespitum	Ph_cespitum	juv		1.3	1.07692	Brachycera	Brachycera	Brachycera		1.4	neutral
246	2016.05.09.	2016	5	Spring	Szabolcs-Szatmár-Bereg	SSB_Orchard_3	Philodromidae	Philodromus cf. cespitum	Ph_cespitum	juv		1	0.4	Nematocera	Nematocera	Nematocera		0.4	neutral
247	2016.05.10.	2016	5	Spring	Szabolcs-Szatmár-Bereg	SSB_Orchard_9	Philodromidae	Philodromus cespitum	Ph_cespitum	juv		1.2	0.583333	Araneae	Araneae	Theridiidae		0.7	natural_enemy
248	2016.05.10.	2016	5	Spring	Szabolcs-Szatmár-Bereg	SSB_Orchard_8	Thomisidae	Misumena vatia		adult	Female	3	0.666667	Nematocera	Nematocera	Nematocera	Bibio sp.	2	neutral	B. cf. hortulanus
249	2016.05.10.	2016	5	Spring	Szabolcs-Szatmár-Bereg	SSB_Orchard_4	Philodromidae	Philodromus cespitum	Ph_cespitum	subadult	Female	1.3	0.307692	Sternorrhyncha	Sternorrhyncha	Aphididae		0.4	pest
250	2016.05.10.	2016	5	Spring	Szabolcs-Szatmár-Bereg	SSB_Orchard_4	Philodromidae	Philodromus cespitum	Ph_cespitum	juv		1.2	0.5	Araneae	Araneae	Araneidae		0.6	natural_enemy
251	2016.05.10.	2016	5	Spring	Szabolcs-Szatmár-Bereg	SSB_Orchard_4	Philodromidae	Philodromus cespitum	Ph_cespitum	juv		1.2	0.5	Sternorrhyncha	Sternorrhyncha	Aphididae		0.6	pest
252	2016.05.10.	2016	5	Spring	Szabolcs-Szatmár-Bereg	SSB_Orchard_4	Philodromidae	Philodromus cespitum	Ph_cespitum	juv		1.2	0.25	Nematocera	Nematocera	Nematocera		0.3	neutral
253	2016.05.10.	2016	5	Spring	Szabolcs-Szatmár-Bereg	SSB_Orchard_4	Philodromidae	Philodromus cespitum	Ph_cespitum	juv		1.3	0.615385	Araneae	Araneae	Araneidae	Mangora acalypha	0.8	natural_enemy
254	2016.05.10.	2016	5	Spring	Szabolcs-Szatmár-Bereg	SSB_Orchard_4	Thomisidae	Misumena vatia		subadult	Female	2.3	0.608696	Nematocera	Nematocera	Nematocera	Bibio sp.	1.4	neutral	B. cf. hortulanus
255	2016.05.10.	2016	5	Spring	Szabolcs-Szatmár-Bereg	SSB_Orchard_4	Oxyopidae	Oxyopes ramosus		subadult	Male	1.7	1	Nematocera	Nematocera	Nematocera	Bibio sp.	1.7	neutral	B. cf. hortulanus
256	2016.05.10.	2016	5	Spring	Szabolcs-Szatmár-Bereg	SSB_Orchard_4	Oxyopidae	Oxyopes ramosus		adult	Female	2	0.75	Nematocera	Nematocera	Nematocera	Bibio sp.	1.5	neutral	B. cf. hortulanus
257	2016.05.10.	2016	5	Spring	Szabolcs-Szatmár-Bereg	SSB_Orchard_1_Újfehértó	Philodromidae	Philodromus cespitum	Ph_cespitum	juv		1.3	0.846154	Coleoptera	Coleoptera	Curculionidae		1.1	pest
258	2016.05.10.	2016	5	Spring	Szabolcs-Szatmár-Bereg	SSB_Orchard_1_Újfehértó	Philodromidae	Philodromus cespitum	Ph_cespitum	juv		1.2	0.333333	Nematocera	Nematocera	Nematocera		0.4	neutral
259	2016.05.10.	2016	5	Spring	Szabolcs-Szatmár-Bereg	SSB_Orchard_1_Újfehértó	Philodromidae	Philodromus cespitum	Ph_cespitum	juv		1.3	0.230769	Nematocera	Nematocera	Nematocera		0.3	neutral
260	2016.05.10.	2016	5	Spring	Szabolcs-Szatmár-Bereg	SSB_Orchard_1_Újfehértó	Philodromidae	Philodromus cespitum	Ph_cespitum	juv		1.4	0.357143	Nematocera	Nematocera	Nematocera		0.5	neutral
261	2016.05.10.	2016	5	Spring	Szabolcs-Szatmár-Bereg	SSB_Orchard_1_Újfehértó	Philodromidae	Philodromus cespitum	Ph_cespitum	subadult	Male	1.8	0.166667	Nematocera	Nematocera	Nematocera		0.3	neutral
262	2016.05.10.	2016	5	Spring	Szabolcs-Szatmár-Bereg	SSB_Orchard_1_Újfehértó	Clubionidae	Clubiona sp.	Clubiona	subadult	Male	1.2	0.583333	Sternorrhyncha	Sternorrhyncha	Psyllidae		0.7	pest	larva
263	2016.05.11.	2016	5	Spring	Szabolcs-Szatmár-Bereg	SSB_Orchard_1_Újfehértó	Salticidae	Heliophanus cupreus	Other_salticids	adult	Female	1.6	0.8125	Brachycera	Brachycera	Brachycera		1.3	neutral
264	2016.05.11.	2016	5	Spring	Szabolcs-Szatmár-Bereg	SSB_Orchard_1_Újfehértó	Salticidae	Heliophanus auratus	Other_salticids	adult	Female	1.5	0.933333	Brachycera	Brachycera	Brachycera		1.4	neutral
265	2016.05.17.	2016	5	Spring	Bács-Kiskun	BK_Orchard_1	Philodromidae	Philodromus cespitum	Ph_cespitum	subadult	Male	1.6	0.25	Sternorrhyncha	Sternorrhyncha	Aphididae		0.4	pest
266	2016.05.17.	2016	5	Spring	Bács-Kiskun	BK_Orchard_1	Philodromidae	Philodromus cespitum	Ph_cespitum	subadult	Female	1.4	1.07143	Brachycera	Brachycera	Brachycera		1.5	neutral
267	2016.05.17.	2016	5	Spring	Bács-Kiskun	BK_Orchard_1	Philodromidae	Philodromus cespitum	Ph_cespitum	subadult	Female	1.4	0.5	Sternorrhyncha	Sternorrhyncha	Aphididae	Dysaphis plantaginea	0.7	pest
268	2016.05.17.	2016	5	Spring	Bács-Kiskun	BK_Orchard_1	Philodromidae	Philodromus cespitum	Ph_cespitum	subadult	Female	1.4	0.357143	Nematocera	Nematocera	Nematocera		0.5	neutral
269	2016.05.17.	2016	5	Spring	Bács-Kiskun	BK_Orchard_1	Philodromidae	Philodromus cespitum	Ph_cespitum	subadult	Female	1.3	0.769231	Sternorrhyncha	Sternorrhyncha	Aphididae	Dysaphis plantaginea	1	pest
270	2016.05.17.	2016	5	Spring	Bács-Kiskun	BK_Orchard_1	Philodromidae	Philodromus cespitum	Ph_cespitum	subadult	Female	1.4	0.642857	Araneae	Araneae	Theridiidae	Dipoena melanogaster	0.9	natural_enemy	adult male
271	2016.05.17.	2016	5	Spring	Bács-Kiskun	BK_Orchard_1	Salticidae	Evarcha arcuata	Other_salticids	adult	Female	2.2	0.227273	Sternorrhyncha	Sternorrhyncha	Aphididae		0.5	pest
272	2016.05.18.	2016	5	Spring	Pest	P_Orchard_2	Salticidae	Pseudicius encarpatus	Other_salticids	adult	Female	1.5	1.06667	Araneae	Araneae	Philodromidae	Philodromus cespitum	1.6	natural_enemy	adult female
273	2016.05.20.	2016	5	Spring	Pest	P_Orchard_6	Philodromidae	Tibellus oblongus		subadult	Female	2	0.8	Brachycera	Brachycera	Brachycera	Platystomatidae sp.	1.6	neutral
274	2016.05.20.	2016	5	Spring	Pest	P_Orchard_6	Thomisidae	Ebrechtella tricuspidata	E_tricuspidata	adult	Female	1.7	0.764706	Sternorrhyncha	Sternorrhyncha	Psyllidae		1.3	pest	larva
275	2016.05.20.	2016	5	Spring	Pest	P_Orchard_6	Thomisidae	Synema globosum		adult	Female	1.6	1.0625	Coleoptera	Coleoptera	Curculionidae	Phyllobius betulinus	1.7	pest
276	2016.05.21.	2016	5	Spring	Szabolcs-Szatmár-Bereg	SSB_Orchard_1_Újfehértó	Philodromidae	Philodromus cespitum	Ph_cespitum	subadult	Male	1.6	1	Brachycera	Brachycera	Brachycera		1.6	neutral
277	2016.05.21.	2016	5	Spring	Szabolcs-Szatmár-Bereg	SSB_Orchard_1_Újfehértó	Philodromidae	Philodromus cespitum	Ph_cespitum	subadult	Male	1.6	0.375	Sternorrhyncha	Sternorrhyncha	Aphididae		0.6	pest
278	2016.05.21.	2016	5	Spring	Szabolcs-Szatmár-Bereg	SSB_Orchard_1_Újfehértó	Philodromidae	Philodromus cespitum	Ph_cespitum	juv		1.2	0.5	Nematocera	Nematocera	Nematocera		0.6	neutral
279	2016.05.21.	2016	5	Spring	Szabolcs-Szatmár-Bereg	SSB_Orchard_1_Újfehértó	Philodromidae	Philodromus cespitum	Ph_cespitum	juv		1.4	0.428571	Nematocera	Nematocera	Nematocera		0.6	neutral
280	2016.05.21.	2016	5	Spring	Szabolcs-Szatmár-Bereg	SSB_Orchard_1_Újfehértó	Thomisidae	Ebrechtella tricuspidata	E_tricuspidata	adult	Male	1.4	0.285714	Nematocera	Nematocera	Nematocera		0.4	neutral
281	2016.05.21.	2016	5	Spring	Szabolcs-Szatmár-Bereg	SSB_Orchard_1_Újfehértó	Thomisidae	Misumena vatia		subadult	Female	2.2	0.681818	Brachycera	Brachycera	Brachycera		1.5	neutral
282	2016.05.21.	2016	5	Spring	Szabolcs-Szatmár-Bereg	SSB_Orchard_1_Újfehértó	Thomisidae	Tmarus piger		adult	Female	2	0.3	Formicidae	Formicidae	Formicidae		0.6	neutral	worker
283	2016.05.21.	2016	5	Spring	Szabolcs-Szatmár-Bereg	SSB_Orchard_1_Újfehértó	Thomisidae	Tmarus piger		adult	Female	2.1	0.238095	Formicidae	Formicidae	Formicidae		0.5	neutral	worker
284	2016.05.21.	2016	5	Spring	Szabolcs-Szatmár-Bereg	SSB_Orchard_1_Újfehértó	Clubionidae	Clubiona frutetorum	Clubiona	adult	Female	1.8	0.888889	Araneae	Araneae	Thomisidae	Ozyptila sp.	1.6	natural_enemy
285	2016.05.21.	2016	5	Spring	Szabolcs-Szatmár-Bereg	SSB_Orchard_1_Újfehértó	Clubionidae	Clubiona frutetorum	Clubiona	adult	Female	1.7	0.294118	Sternorrhyncha	Sternorrhyncha	Aphididae		0.5	pest
286	2016.05.21.	2016	5	Spring	Szabolcs-Szatmár-Bereg	SSB_Orchard_1_Újfehértó	Clubionidae	Clubiona sp.	Clubiona	juv		1.3		Sternorrhyncha	Sternorrhyncha	Aphididae	Aphis pomi		pest	imago, winged
287	2016.06.10.	2016	6	Summer	Szabolcs-Szatmár-Bereg	SSB_Orchard_1_Újfehértó	Philodromidae	Philodromus cespitum	Ph_cespitum	subadult	Male	1.5	0.466667	Sternorrhyncha	Sternorrhyncha	Aphididae		0.7	pest
288	2016.06.13.	2016	6	Summer	Szabolcs-Szatmár-Bereg	SSB_Orchard_1_Újfehértó	Philodromidae	Philodromus cespitum	Ph_cespitum	adult	Female	2	0.2	Nematocera	Nematocera	Nematocera		0.4	neutral
289	2016.06.13.	2016	6	Summer	Szabolcs-Szatmár-Bereg	SSB_Orchard_1_Újfehértó	Philodromidae	Philodromus cespitum	Ph_cespitum	adult	Male	1.8	0.611111	Brachycera	Brachycera	Brachycera		1.1	neutral
290	2016.06.13.	2016	6	Summer	Szabolcs-Szatmár-Bereg	SSB_Orchard_1_Újfehértó	Philodromidae	Philodromus cespitum	Ph_cespitum	adult	Female	2.1	1.14286	Brachycera	Brachycera	Syrphidae	Syrphidae sp.	2.4	natural_enemy	imago
291	2016.06.13.	2016	6	Summer	Szabolcs-Szatmár-Bereg	SSB_Orchard_1_Újfehértó	Thomisidae	Misumena vatia		juv		1	1.4	Brachycera	Brachycera	Brachycera		1.4	neutral
292	2016.06.14.	2016	6	Summer	Szabolcs-Szatmár-Bereg	SSB_Orchard_1_Újfehértó	Philodromidae	Philodromus cespitum	Ph_cespitum	subadult	Female	1.7	0.294118	Sternorrhyncha	Sternorrhyncha	Aphididae		0.5	pest
293	2016.06.14.	2016	6	Summer	Szabolcs-Szatmár-Bereg	SSB_Orchard_1_Újfehértó	Philodromidae	Philodromus cespitum	Ph_cespitum	juv		1.2	0.416667	Sternorrhyncha	Sternorrhyncha	Aphididae		0.5	pest
294	2016.06.17.	2016	6	Summer	Pest	P_Orchard_2	Philodromidae	Philodromus longipalpis		subadult	Female	1.6	1.625	Brachycera	Brachycera	Syrphidae	Syrphidae sp.	2.6	natural_enemy	imago
295	2016.06.17.	2016	6	Summer	Pest	P_Orchard_2	Philodromidae	Philodromus longipalpis		subadult	Female	1.7	0.352941	Auchenorrhyncha	Auchenorrhyncha			0.6	neutral	larva
296	2016.06.17.	2016	6	Summer	Pest	P_Orchard_2	Thomisidae	Ebrechtella tricuspidata	E_tricuspidata	adult	Male	1.6	0.875	Brachycera	Brachycera	Brachycera		1.4	neutral
297	2016.06.17.	2016	6	Summer	Pest	P_Orchard_2	Thomisidae	Misumena vatia		subadult	Male	1.1	0.454545	Brachycera	Brachycera	Brachycera		0.5	neutral
298	2016.06.20.	2016	6	Summer	Pest	P_Orchard_4	Philodromidae	Philodromus longipalpis		adult	Female	1.9	0.842105	Brachycera	Brachycera	Brachycera		1.6	neutral
299	2013.05.17.	2013	5	Spring	Szabolcs-Szatmár-Bereg	SSB_Orchard_1_Újfehértó	Cheiracanthiidae	Cheiracanthium sp.		juv				Sternorrhyncha	Sternorrhyncha	Aphididae	Dysaphis plantaginea		pest	imago, wingless
300	2013.06.20.	2013	6	Summer	Szabolcs-Szatmár-Bereg	SSB_Orchard_1_Újfehértó	Salticidae	Heliophanus auratus	Other_salticids	adult	Male			Sternorrhyncha	Sternorrhyncha	Aphididae	Aphis pomi		pest	imago, winged
301	2013.06.21.	2013	6	Summer	Szabolcs-Szatmár-Bereg	SSB_Orchard_1_Újfehértó	Philodromidae	Philodromus cespitum	Ph_cespitum	adult	Female			Brachycera	Brachycera	Brachycera			neutral
302	2013.05.28.	2013	5	Spring	Szabolcs-Szatmár-Bereg	SSB_Orchard_1_Újfehértó	Philodromidae	Philodromus cespitum	Ph_cespitum	juv				Sternorrhyncha	Sternorrhyncha	Aphididae	Aphis pomi		pest	larva, L4
303	2013.04.29.	2013	4	Spring	Szabolcs-Szatmár-Bereg	SSB_Orchard_1_Újfehértó	Cheiracanthiidae	Cheiracanthium sp.						Sternorrhyncha	Sternorrhyncha	Aphididae	Dysaphis plantaginea		pest	fundatrix
304	2013.05.01.	2013	5	Spring	Szabolcs-Szatmár-Bereg	SSB_Orchard_1_Újfehértó	Philodromidae	Philodromus cespitum	Ph_cespitum	juv				Sternorrhyncha	Sternorrhyncha	Aphididae	Dysaphis plantaginea		pest	imago
305	2013.05.01.	2013	5	Spring	Szabolcs-Szatmár-Bereg	SSB_Orchard_1_Újfehértó	Philodromidae	Philodromus cespitum	Ph_cespitum	subadult	Male			Sternorrhyncha	Sternorrhyncha	Aphididae	Dysaphis plantaginea		pest	imago
306	2013.05.07.	2013	5	Spring	Szabolcs-Szatmár-Bereg	SSB_Orchard_1_Újfehértó	Cheiracanthiidae	Cheiracanthium sp.		juv				Sternorrhyncha	Sternorrhyncha	Aphididae	Dysaphis plantaginea		pest	imago
307	2014.04.05.	2014	4	Spring	Szabolcs-Szatmár-Bereg	SSB_Orchard_1_Újfehértó	Philodromidae	Philodromus cespitum	Ph_cespitum	juv				Sternorrhyncha	Sternorrhyncha	Aphididae	Dysaphis plantaginea		pest	fundatrix
308	2014.04.05.	2014	4	Spring	Szabolcs-Szatmár-Bereg	SSB_Orchard_1_Újfehértó	Philodromidae	Philodromus cespitum	Ph_cespitum	juv				Sternorrhyncha	Sternorrhyncha	Aphididae	Dysaphis plantaginea		pest
309	2014.04.10.	2014	4	Spring	Szabolcs-Szatmár-Bereg	SSB_Orchard_1_Újfehértó	Philodromidae	Philodromus cespitum	Ph_cespitum	subadult	Female			Sternorrhyncha	Sternorrhyncha	Aphididae	Dysaphis plantaginea		pest	fundatrix
310	2014.04.10.	2014	4	Spring	Szabolcs-Szatmár-Bereg	SSB_Orchard_1_Újfehértó	Philodromidae	Philodromus cespitum	Ph_cespitum	subadult	Male			Sternorrhyncha	Sternorrhyncha	Aphididae	Dysaphis plantaginea		pest	fundatrix
311	2014.04.10.	2014	4	Spring	Szabolcs-Szatmár-Bereg	SSB_Orchard_1_Újfehértó	Clubionidae	Clubiona sp.	Clubiona	juv				Nematocera	Nematocera	Nematocera			neutral
312	2014.04.10.	2014	4	Spring	Szabolcs-Szatmár-Bereg	SSB_Orchard_1_Újfehértó	Clubionidae	Clubiona sp.	Clubiona	juv				Brachycera	Brachycera	Brachycera			neutral
313	2014.04.10.	2014	4	Spring	Szabolcs-Szatmár-Bereg	SSB_Orchard_1_Újfehértó	Thomisidae	Xysticus sp.	Xysticus	juv				Formicidae	Formicidae	Formicidae			neutral	worker
314	2014.04.11.	2014	4	Spring	Szabolcs-Szatmár-Bereg	SSB_Orchard_1_Újfehértó	Philodromidae	Philodromus cespitum	Ph_cespitum	juv				Sternorrhyncha	Sternorrhyncha	Aphididae	Dysaphis plantaginea		pest	larva, L2
315	2014.04.11.	2014	4	Spring	Szabolcs-Szatmár-Bereg	SSB_Orchard_1_Újfehértó	Philodromidae	Philodromus cespitum	Ph_cespitum	subadult	Female			Sternorrhyncha	Sternorrhyncha	Aphididae	Dysaphis plantaginea		pest	fundatrix
316	2014.04.17.	2014	4	Spring	Szabolcs-Szatmár-Bereg	SSB_Orchard_1_Újfehértó	Philodromidae	Philodromus cespitum	Ph_cespitum	subadult	Male			Brachycera	Brachycera	Brachycera			neutral
317	2014.04.18.	2014	4	Spring	Szabolcs-Szatmár-Bereg	SSB_Orchard_1_Újfehértó	Philodromidae	Philodromus cespitum	Ph_cespitum	juv				Sternorrhyncha	Sternorrhyncha	Aphididae	Dysaphis plantaginea		pest	larva, L3
318	2014.04.28.	2014	4	Spring	Szabolcs-Szatmár-Bereg	SSB_Orchard_1_Újfehértó	Philodromidae	Philodromus cespitum	Ph_cespitum	juv				Acari	Other prey	Trombidiidae			natural_enemy
319	2014.04.29.	2014	4	Spring	Szabolcs-Szatmár-Bereg	SSB_Orchard_1_Újfehértó	Philodromidae	Philodromus cespitum	Ph_cespitum	juv				Nematocera	Nematocera	Nematocera	Bibio sp.		neutral
320	2014.04.29.	2014	4	Spring	Szabolcs-Szatmár-Bereg	SSB_Orchard_1_Újfehértó	Philodromidae	Philodromus cespitum	Ph_cespitum	juv				Nematocera	Nematocera	Nematocera	Bibio sp.		neutral
321	2014.04.30.	2014	4	Spring	Szabolcs-Szatmár-Bereg	SSB_Orchard_1_Újfehértó	Thomisidae	Ebrechtella tricuspidata	E_tricuspidata	adult	Male			Sternorrhyncha	Sternorrhyncha	Aphididae	Dysaphis plantaginea		pest	imago
322	2014.04.30.	2014	4	Spring	Szabolcs-Szatmár-Bereg	SSB_Orchard_1_Újfehértó	Philodromidae	Philodromus cespitum	Ph_cespitum	juv				Nematocera	Nematocera	Nematocera	Bibio sp.		neutral
323	2014.04.30.	2014	4	Spring	Szabolcs-Szatmár-Bereg	SSB_Orchard_1_Újfehértó	Thomisidae	Ebrechtella tricuspidata	E_tricuspidata	juv				Sternorrhyncha	Sternorrhyncha	Psyllidae	Cacopsylla melanoneura		pest	imago
324	2014.04.30.	2014	4	Spring	Szabolcs-Szatmár-Bereg	SSB_Orchard_1_Újfehértó	Philodromidae	Philodromus cespitum	Ph_cespitum	juv				Nematocera	Nematocera	Nematocera	Bibio sp.		neutral
325	2014.05.23.	2014	5	Spring	Szabolcs-Szatmár-Bereg	SSB_Orchard_1_Újfehértó	Philodromidae	Philodromus cespitum	Ph_cespitum	subadult	Female			Sternorrhyncha	Sternorrhyncha	Aphididae	Aphis pomi		pest	imago, winged
326	2015.05.06.	2015	5	Spring	Szabolcs-Szatmár-Bereg	SSB_Orchard_1_Újfehértó	Clubionidae	Clubiona sp.	Clubiona	juv				Sternorrhyncha	Sternorrhyncha	Aphididae	Dysaphis plantaginea		pest	imago
327	2015.05.06.	2015	5	Spring	Szabolcs-Szatmár-Bereg	SSB_Orchard_1_Újfehértó	Philodromidae	Philodromus cespitum	Ph_cespitum	juv				Sternorrhyncha	Sternorrhyncha	Aphididae	Dysaphis plantaginea		pest	larva, L4
328	2015.05.06.	2015	5	Spring	Szabolcs-Szatmár-Bereg	SSB_Orchard_1_Újfehértó	Clubionidae	Clubiona sp.	Clubiona	adult	Female			Sternorrhyncha	Sternorrhyncha	Aphididae	Dysaphis plantaginea		pest	imago
329	2015.05.24.	2015	5	Spring	Szabolcs-Szatmár-Bereg	SSB_Orchard_1_Újfehértó	Philodromidae	Philodromus cespitum	Ph_cespitum	subadult	Female			Sternorrhyncha	Sternorrhyncha	Aphididae	Dysaphis plantaginea		pest	imago
330	2015.05.24.	2015	5	Spring	Szabolcs-Szatmár-Bereg	SSB_Orchard_1_Újfehértó	Philodromidae	Philodromus cespitum	Ph_cespitum	adult	Male			Sternorrhyncha	Sternorrhyncha	Aphididae	Dysaphis plantaginea		pest	imago
331	2015.05.27.	2015	5	Spring	Szabolcs-Szatmár-Bereg	SSB_Orchard_1_Újfehértó	Philodromidae	Philodromus cespitum	Ph_cespitum	adult	Male			Sternorrhyncha	Sternorrhyncha	Aphididae	Dysaphis plantaginea		pest	larva, L4 winged
332	2015.06.09.	2015	6	Summer	Szabolcs-Szatmár-Bereg	SSB_Orchard_1_Újfehértó	Philodromidae	Philodromus cespitum	Ph_cespitum	adult	Female			Sternorrhyncha	Sternorrhyncha	Aphididae	Dysaphis plantaginea		pest	imago, winged
333	2016.07.02.	2016	7	Summer	Pest	P_Orchard_7	Thomisidae	Xysticus (Spiracme) striatipes	Xysticus	juv		1.4	0.642857	Formicidae	Formicidae	Formicidae		0.9	neutral	worker
334	2016.07.02.	2016	7	Summer	Pest	P_Orchard_7	Thomisidae	Xysticus (Spiracme) striatipes	Xysticus	juv		1.3	0.846154	Formicidae	Formicidae	Formicidae		1.1	neutral	winged male
335	2016.07.11.	2016	7	Summer	Szabolcs-Szatmár-Bereg	SSB_Orchard_1_Újfehértó	Thomisidae	Ebrechtella tricuspidata	E_tricuspidata	adult	Female	2	2.15	Other Hymenoptera	Other Hymenoptera	Apidae	Apis mellifera	4.3	neutral
336	2016.07.11.	2016	7	Summer	Szabolcs-Szatmár-Bereg	SSB_Orchard_1_Újfehértó	Thomisidae	Misumena vatia		adult	Female	2.6	0.423077	Nematocera	Nematocera	Nematocera	Culicidae sp.	1.1	neutral
337	2016.07.11.	2016	7	Summer	Szabolcs-Szatmár-Bereg	SSB_Orchard_1_Újfehértó	Philodromidae	Philodromus cespitum	Ph_cespitum	adult	Female	2	0.65	Auchenorrhyncha	Auchenorrhyncha	Flatidae	Metcalfa pruinosa	1.3	pest	larva
338	2016.07.11.	2016	7	Summer	Szabolcs-Szatmár-Bereg	SSB_Orchard_1_Újfehértó	Philodromidae	Philodromus cespitum	Ph_cespitum	adult	Female	2.3	0.26087	Araneae	Araneae	Clubionidae		0.6	natural_enemy
339	2016.07.11.	2016	7	Summer	Szabolcs-Szatmár-Bereg	SSB_Orchard_1_Újfehértó	Philodromidae	Philodromus cespitum	Ph_cespitum	adult	Male	1.8	0.666667	Auchenorrhyncha	Auchenorrhyncha	Flatidae	Metcalfa pruinosa	1.2	pest	larva
340	2016.07.11.	2016	7	Summer	Szabolcs-Szatmár-Bereg	SSB_Orchard_1_Újfehértó	Salticidae	Evarcha arcuata	Other_salticids	subadult	Male	1.6	0.25	Brachycera	Brachycera	Brachycera		0.4	neutral
341	2016.07.11.	2016	7	Summer	Szabolcs-Szatmár-Bereg	SSB_Orchard_1_Újfehértó	Salticidae	Heliophanus cupreus	Other_salticids	juv		0.8	0.75	Sternorrhyncha	Sternorrhyncha	Aphididae		0.6	pest
342	2016.07.11.	2016	7	Summer	Szabolcs-Szatmár-Bereg	SSB_Orchard_1_Újfehértó	Salticidae	Carrhotus xanthogramma	C_xanthogramma	juv		1.2	0.333333	Nematocera	Nematocera	Nematocera		0.4	neutral
343	2016.07.11.	2016	7	Summer	Szabolcs-Szatmár-Bereg	SSB_Orchard_1_Újfehértó	Thomisidae	Xysticus sp.	Xysticus	juv		0.9	0.666667	Formicidae	Formicidae	Formicidae		0.6	neutral	worker
344	2016.07.11.	2016	7	Summer	Szabolcs-Szatmár-Bereg	SSB_Orchard_1_Újfehértó	Thomisidae	Xysticus sp.	Xysticus	juv		0.9	0.555556	Formicidae	Formicidae	Formicidae		0.5	neutral	worker
345	2016.07.11.	2016	7	Summer	Szabolcs-Szatmár-Bereg	SSB_Orchard_1_Újfehértó	Clubionidae	Clubiona sp.	Clubiona	juv		1	1.4	Auchenorrhyncha	Auchenorrhyncha	Flatidae	Metcalfa pruinosa	1.4	pest	larva
346	2016.07.07.	2016	7	Summer	Szabolcs-Szatmár-Bereg	SSB_Orchard_1_Újfehértó	Philodromidae	Philodromus cespitum	Ph_cespitum	subadult	Female	1.5	0.8	Auchenorrhyncha	Auchenorrhyncha	Cicadellidae		1.2	neutral	imago
347	2016.07.07.	2016	7	Summer	Szabolcs-Szatmár-Bereg	SSB_Orchard_1_Újfehértó	Salticidae	Pseudicius encarpatus	Other_salticids	juv		1.2	0.916667	Brachycera	Brachycera	Brachycera		1.1	neutral
348	2016.07.07.	2016	7	Summer	Szabolcs-Szatmár-Bereg	SSB_Orchard_1_Újfehértó	Thomisidae	Ebrechtella tricuspidata	E_tricuspidata	adult	Male	1.8	1.44444	Brachycera	Brachycera	Syrphidae	Eupeodes corollae	2.6	natural_enemy	imago
349	2016.07.07.	2016	7	Summer	Szabolcs-Szatmár-Bereg	SSB_Orchard_1_Újfehértó	Philodromidae	Philodromus cespitum	Ph_cespitum	adult	Female	1.9	0.210526	Acari	Other prey	Trombidiidae		0.4	natural_enemy
350	2016.07.20.	2016	7	Summer	Szabolcs-Szatmár-Bereg	SSB_Orchard_1_Újfehértó	Clubionidae	Clubiona sp.	Clubiona	juv		0.8	0.625	Sternorrhyncha	Sternorrhyncha	Aphididae	Aphis pomi	0.5	pest
351	2016.07.20.	2016	7	Summer	Szabolcs-Szatmár-Bereg	SSB_Orchard_1_Újfehértó	Thomisidae	Xysticus acerbus	Xysticus	juv		1.5	0.333333	Formicidae	Formicidae	Formicidae		0.5	neutral	worker
352	2016.08.03.	2016	8	Summer	Szabolcs-Szatmár-Bereg	SSB_Orchard_1_Újfehértó	Thomisidae	Ebrechtella tricuspidata	E_tricuspidata	juv		1.3	0.307692	Nematocera	Nematocera	Nematocera		0.4	neutral
353	2016.08.03.	2016	8	Summer	Szabolcs-Szatmár-Bereg	SSB_Orchard_1_Újfehértó	Thomisidae	Xysticus (Spiracme) striatipes	Xysticus	subadult	Male	1.8	1.27778	Brachycera	Brachycera	Brachycera		2.3	neutral
354	2016.08.03.	2016	8	Summer	Szabolcs-Szatmár-Bereg	SSB_Orchard_1_Újfehértó	Thomisidae	Xysticus sp.	Xysticus	juv		1.2	1.83333	Auchenorrhyncha	Auchenorrhyncha	Flatidae	Metcalfa pruinosa	2.2	pest	imago
355	2016.08.03.	2016	8	Summer	Szabolcs-Szatmár-Bereg	SSB_Orchard_1_Újfehértó	Thomisidae	Xysticus kochi	Xysticus	juv		1.2	0.583333	Heteroptera	Heteroptera	Miridae	Pilophorus sp.	0.7	natural_enemy
356	2016.08.03.	2016	8	Summer	Szabolcs-Szatmár-Bereg	SSB_Orchard_1_Újfehértó	Salticidae	Carrhotus xanthogramma	C_xanthogramma	juv		1.4	1.21429	Brachycera	Brachycera	Brachycera		1.7	neutral
357	2016.08.03.	2016	8	Summer	Szabolcs-Szatmár-Bereg	SSB_Orchard_1_Újfehértó	Salticidae	Carrhotus xanthogramma	C_xanthogramma	juv		1.4	0.571429	Brachycera	Brachycera	Brachycera		0.8	neutral
358	2016.08.03.	2016	8	Summer	Szabolcs-Szatmár-Bereg	SSB_Orchard_1_Újfehértó	Salticidae	Carrhotus xanthogramma	C_xanthogramma	juv		1.1	0.363636	Sternorrhyncha	Sternorrhyncha	Aphididae		0.4	pest
359	2016.08.09.	2016	8	Summer	Szabolcs-Szatmár-Bereg	SSB_Orchard_1_Újfehértó	Clubionidae	Clubiona sp.	Clubiona	juv		1	0.4	Nematocera	Nematocera	Nematocera		0.4	neutral
360	2016.08.09.	2016	8	Summer	Szabolcs-Szatmár-Bereg	SSB_Orchard_1_Újfehértó	Thomisidae	Ebrechtella tricuspidata	E_tricuspidata	juv		1.2	0.416667	Sternorrhyncha	Sternorrhyncha	Aphididae		0.5	pest	imago, winged
361	2016.08.09.	2016	8	Summer	Szabolcs-Szatmár-Bereg	SSB_Orchard_1_Újfehértó	Salticidae	Evarcha falcata	Other_salticids	subadult	Female	1.5	0.666667	Araneae	Araneae	Salticidae		1	natural_enemy
362	2016.08.16.	2016	8	Summer	Szabolcs-Szatmár-Bereg	SSB_Orchard_1_Újfehértó	Philodromidae	Philodromus cespitum	Ph_cespitum	adult	Female	2.2	1	Auchenorrhyncha	Auchenorrhyncha	Flatidae	Metcalfa pruinosa	2.2	pest	imago
363	2016.08.16.	2016	8	Summer	Szabolcs-Szatmár-Bereg	SSB_Orchard_1_Újfehértó	Thomisidae	Ebrechtella tricuspidata	E_tricuspidata	subadult	Male	1.1	0.454545	Sternorrhyncha	Sternorrhyncha	Aphididae	Aphis pomi	0.5	pest	imago, winged
364	2016.08.16.	2016	8	Summer	Szabolcs-Szatmár-Bereg	SSB_Orchard_1_Újfehértó	Thomisidae	Xysticus (Spiracme) striatipes	Xysticus	subadult	Male	1.9	0.789474	Brachycera	Brachycera	Brachycera		1.5	neutral
365	2016.08.16.	2016	8	Summer	Szabolcs-Szatmár-Bereg	SSB_Orchard_1_Újfehértó	Oxyopidae	Oxyopes ramosus		juv		1.4	0.714286	Nematocera	Nematocera	Nematocera	Culicidae sp.	1	neutral
366	2016.08.16.	2016	8	Summer	Szabolcs-Szatmár-Bereg	SSB_Orchard_1_Újfehértó	Clubionidae	Clubiona sp.	Clubiona	juv		1.2	1.16667	Brachycera	Brachycera	Brachycera		1.4	neutral
367	2016.08.16.	2016	8	Summer	Szabolcs-Szatmár-Bereg	SSB_Orchard_1_Újfehértó	Cheiracanthiidae	Cheiracanthium sp.		juv		1.5	0.266667	Nematocera	Nematocera	Nematocera		0.4	neutral
368	2016.08.16.	2016	8	Summer	Szabolcs-Szatmár-Bereg	SSB_Orchard_1_Újfehértó	Salticidae	Carrhotus xanthogramma	C_xanthogramma	subadult	Male	2.1	1	Auchenorrhyncha	Auchenorrhyncha	Flatidae	Metcalfa pruinosa	2.1	pest	imago
369	2016.08.16.	2016	8	Summer	Szabolcs-Szatmár-Bereg	SSB_Orchard_1_Újfehértó	Salticidae	Carrhotus xanthogramma	C_xanthogramma	juv		1.6	0.25	Sternorrhyncha	Sternorrhyncha	Aphididae	Aphis pomi	0.4	pest	imago, winged
370	2016.08.16.	2016	8	Summer	Szabolcs-Szatmár-Bereg	SSB_Orchard_1_Újfehértó	Salticidae	Carrhotus xanthogramma	C_xanthogramma	juv		1.9	1	Brachycera	Brachycera	Brachycera		1.9	neutral
371	2016.08.16.	2016	8	Summer	Szabolcs-Szatmár-Bereg	SSB_Orchard_1_Újfehértó	Salticidae	Carrhotus xanthogramma	C_xanthogramma	juv		1.7	0.352941	Brachycera	Brachycera	Brachycera		0.6	neutral
372	2016.08.16.	2016	8	Summer	Szabolcs-Szatmár-Bereg	SSB_Orchard_1_Újfehértó	Salticidae	Carrhotus xanthogramma	C_xanthogramma	juv		1.4	0.571429	Auchenorrhyncha	Auchenorrhyncha			0.8	neutral	imago
373	2016.08.16.	2016	8	Summer	Szabolcs-Szatmár-Bereg	SSB_Orchard_1_Újfehértó	Salticidae	Carrhotus xanthogramma	C_xanthogramma	juv		1.8	0.444444	Heteroptera	Heteroptera	Miridae	cf. Campylomma sp.	0.8	natural_enemy
374	2016.08.16.	2016	8	Summer	Szabolcs-Szatmár-Bereg	SSB_Orchard_1_Újfehértó	Salticidae	Carrhotus xanthogramma	C_xanthogramma	juv		1.9	1	Brachycera	Brachycera	Brachycera		1.9	neutral
375	2016.09.05.	2016	9	Fall	Szabolcs-Szatmár-Bereg	SSB_Orchard_1_Újfehértó	Salticidae	Carrhotus xanthogramma	C_xanthogramma	subadult	Male	1.8	0.888889	Brachycera	Brachycera	Syrphidae	Syrphidae sp.	1.6	natural_enemy	imago
376	2016.09.05.	2016	9	Fall	Szabolcs-Szatmár-Bereg	SSB_Orchard_1_Újfehértó	Thomisidae	Ebrechtella tricuspidata	E_tricuspidata	juv		1	0.5	Nematocera	Nematocera	Nematocera		0.5	neutral
377	2016.09.05.	2016	9	Fall	Szabolcs-Szatmár-Bereg	SSB_Orchard_1_Újfehértó	Clubionidae	Clubiona sp.	Clubiona	juv		1.5		Heteroptera	Heteroptera	Miridae	cf. Campylomma sp.		natural_enemy
378	2016.09.05.	2016	9	Fall	Szabolcs-Szatmár-Bereg	SSB_Orchard_1_Újfehértó	Clubionidae	Clubiona sp.	Clubiona	juv		1.2	1.5	Auchenorrhyncha	Auchenorrhyncha	Flatidae	Metcalfa pruinosa	1.8	pest	imago
379	2016.09.05.	2016	9	Fall	Szabolcs-Szatmár-Bereg	SSB_Orchard_1_Újfehértó	Clubionidae	Clubiona sp.	Clubiona	subadult	Male	1.3	0.307692	Other Hymenoptera	Other Hymenoptera			0.4	natural_enemy	Hymenoptera parasitica
380	2016.09.09.	2016	9	Fall	Pest	P_Orchard_5	Cheiracanthiidae	Cheiracanthium sp.		subadult	Male	1.6	1.75	Lepidoptera	Lepidoptera	Arctiidae	Hyphantria cunea	2.8	pest	larva
381	2016.09.09.	2016	9	Fall	Pest	P_Orchard_5	Cheiracanthiidae	Cheiracanthium sp.		juv		1.2	0.833333	Heteroptera	Heteroptera	Tingidae	Stephanitis pyri	1	pest
382	2016.09.09.	2016	9	Fall	Pest	P_Orchard_5	Cheiracanthiidae	Cheiracanthium sp.		juv		1.3	0.538462	Araneae	Araneae			0.7	natural_enemy
383	2016.09.09.	2016	9	Fall	Pest	P_Orchard_8	Salticidae	Carrhotus xanthogramma	C_xanthogramma	subadult	Female	2.1	1.28571	Brachycera	Brachycera	Brachycera		2.7	neutral
384	2016.09.12.	2016	9	Fall	Szabolcs-Szatmár-Bereg	SSB_Orchard_1_Újfehértó	Thomisidae	Misumena vatia		juv		0.8	0.625	Araneae	Araneae	Araneidae		0.5	natural_enemy
385	2016.09.12.	2016	9	Fall	Szabolcs-Szatmár-Bereg	SSB_Orchard_1_Újfehértó	Clubionidae	Clubiona sp.	Clubiona	juv		0.6	1	Sternorrhyncha	Sternorrhyncha	Aphididae		0.6	pest	imago, winged
386	2016.09.12.	2016	9	Fall	Szabolcs-Szatmár-Bereg	SSB_Orchard_1_Újfehértó	Clubionidae	Clubiona sp.	Clubiona	juv		0.5	1	Nematocera	Nematocera	Nematocera		0.5	neutral
387	2016.09.12.	2016	9	Fall	Szabolcs-Szatmár-Bereg	SSB_Orchard_1_Újfehértó	Clubionidae	Clubiona sp.	Clubiona	juv		1.3	0.692308	Lepidoptera	Lepidoptera	cf. leaf miner		0.9	pest	imago
388	2016.09.12.	2016	9	Fall	Szabolcs-Szatmár-Bereg	SSB_Orchard_1_Újfehértó	Clubionidae	Clubiona sp.	Clubiona	subadult	Male	1.7		Araneae	Araneae				natural_enemy	cf. Salticidae sp.
389	2016.09.12.	2016	9	Fall	Szabolcs-Szatmár-Bereg	SSB_Orchard_1_Újfehértó	Clubionidae	Clubiona sp.	Clubiona	juv		0.6	0.833333	Nematocera	Nematocera	Nematocera		0.5	neutral
390	2016.09.12.	2016	9	Fall	Szabolcs-Szatmár-Bereg	SSB_Orchard_1_Újfehértó	Clubionidae	Clubiona frutetorum	Clubiona	adult	Female	1.5		Nematocera	Nematocera	Nematocera			neutral
391	2016.09.20.	2016	9	Fall	Szabolcs-Szatmár-Bereg	SSB_Orchard_7	Philodromidae	Philodromus margaritatus		subadult	Male	2.8	0.535714	Araneae	Araneae	Cheiracanthiidae	Cheiracanthium sp.	1.5	natural_enemy
392	2016.09.20.	2016	9	Fall	Szabolcs-Szatmár-Bereg	SSB_Orchard_3	Thomisidae	Xysticus (Spiracme) striatipes	Xysticus	adult	Female	3.1	1.06452	Coleoptera	Coleoptera	Carabidae		3.3	natural_enemy
393	2016.09.20.	2016	9	Fall	Szabolcs-Szatmár-Bereg	SSB_Orchard_1_Újfehértó	Salticidae	Carrhotus xanthogramma	C_xanthogramma	subadult	Male	2.5	0.96	Auchenorrhyncha	Auchenorrhyncha	Flatidae	Metcalfa pruinosa	2.4	pest	imago
394	2016.09.27.	2016	9	Fall	Bács-Kiskun	BK_Orchard_2	Thomisidae	Xysticus ulmi	Xysticus	subadult	Male	1.7	0.529412	Nematocera	Nematocera	Nematocera		0.9	neutral
395	2016.09.30.	2016	9	Fall	Szabolcs-Szatmár-Bereg	SSB_Orchard_1_Újfehértó	Clubionidae	Clubiona sp.	Clubiona	juv		0.6	1	Sternorrhyncha	Sternorrhyncha	Aphididae		0.6	pest
396	2016.09.30.	2016	9	Fall	Szabolcs-Szatmár-Bereg	SSB_Orchard_1_Újfehértó	Clubionidae	Clubiona sp.	Clubiona	juv		0.5	1	Nematocera	Nematocera	Nematocera		0.5	neutral
397	2016.09.30.	2016	9	Fall	Szabolcs-Szatmár-Bereg	SSB_Orchard_1_Újfehértó	Clubionidae	Clubiona sp.	Clubiona	juv		0.7	0.857143	Sternorrhyncha	Sternorrhyncha	Aphididae		0.6	pest
398	2016.09.30.	2016	9	Fall	Szabolcs-Szatmár-Bereg	SSB_Orchard_1_Újfehértó	Clubionidae	Clubiona sp.	Clubiona	juv		0.6	0.666667	Nematocera	Nematocera	Nematocera		0.4	neutral
399	2016.09.30.	2016	9	Fall	Szabolcs-Szatmár-Bereg	SSB_Orchard_1_Újfehértó	Clubionidae	Clubiona sp.	Clubiona	subadult	Female	1.6	1.3125	Lepidoptera	Lepidoptera	cf. Tortricidae		2.1	pest	imago
400	2016.10.13.	2016	10	Fall	Szabolcs-Szatmár-Bereg	SSB_Orchard_1_Újfehértó	Clubionidae	Clubiona sp.	Clubiona	juv		0.6	0.5	Sternorrhyncha	Sternorrhyncha	Aphididae		0.3	pest	larva, L1
401	2016.10.13.	2016	10	Fall	Szabolcs-Szatmár-Bereg	SSB_Orchard_1_Újfehértó	Clubionidae	Clubiona sp.	Clubiona	juv		0.8	0.875	Sternorrhyncha	Sternorrhyncha	Aphididae		0.7	pest	imago, winged
402	2016.04.16.	2016	4	Spring	Szabolcs-Szatmár-Bereg	SSB_Orchard_1_Újfehértó	Philodromidae	Philodromus cespitum	Ph_cespitum	juv				Sternorrhyncha	Sternorrhyncha	Psyllidae			pest	larva
403	2016.04.16.	2016	4	Spring	Szabolcs-Szatmár-Bereg	SSB_Orchard_1_Újfehértó	Philodromidae	Philodromus cespitum	Ph_cespitum	juv				Sternorrhyncha	Sternorrhyncha	Aphididae	Dysaphis plantaginea		pest	larva, L4
404	2016.04.16.	2016	4	Spring	Szabolcs-Szatmár-Bereg	SSB_Orchard_1_Újfehértó	Philodromidae	Philodromus cespitum	Ph_cespitum	juv				Sternorrhyncha	Sternorrhyncha	Aphididae	Dysaphis plantaginea		pest	imago
405	2016.04.16.	2016	4	Spring	Szabolcs-Szatmár-Bereg	SSB_Orchard_1_Újfehértó	Philodromidae	Philodromus cespitum	Ph_cespitum	juv				Sternorrhyncha	Sternorrhyncha	Aphididae	Dysaphis plantaginea		pest	larva, L2
406	2016.04.19.	2016	4	Spring	Szabolcs-Szatmár-Bereg	SSB_Orchard_1_Újfehértó	Philodromidae	Philodromus cespitum	Ph_cespitum	juv				Sternorrhyncha	Sternorrhyncha	Aphididae	Dysaphis plantaginea		pest	larva, L2
407	2016.04.19.	2016	4	Spring	Szabolcs-Szatmár-Bereg	SSB_Orchard_1_Újfehértó	Clubionidae	Clubiona sp.	Clubiona	subadult	Male			Sternorrhyncha	Sternorrhyncha	Aphididae	Dysaphis plantaginea		pest	larva, L2
408	2016.04.19.	2016	4	Spring	Szabolcs-Szatmár-Bereg	SSB_Orchard_1_Újfehértó	Clubionidae	Clubiona sp.	Clubiona	subadult	Male			Sternorrhyncha	Sternorrhyncha	Aphididae	Dysaphis plantaginea		pest	larva, L2
409	2016.04.28.	2016	4	Spring	Szabolcs-Szatmár-Bereg	SSB_Orchard_1_Újfehértó	Clubionidae	Clubiona sp.	Clubiona	juv				Sternorrhyncha	Sternorrhyncha	Aphididae	Aphis pomi		pest	imago, winged
410	2016.04.28.	2016	4	Spring	Szabolcs-Szatmár-Bereg	SSB_Orchard_1_Újfehértó	Clubionidae	Clubiona sp.	Clubiona	juv				Sternorrhyncha	Sternorrhyncha	Psyllidae	Cacopsylla mali		pest	larva
411	2016.04.28.	2016	4	Spring	Szabolcs-Szatmár-Bereg	SSB_Orchard_1_Újfehértó	Philodromidae	Philodromus cespitum	Ph_cespitum	juv				Sternorrhyncha	Sternorrhyncha	Aphididae	Dysaphis plantaginea		pest	imago
412	2016.04.28.	2016	4	Spring	Szabolcs-Szatmár-Bereg	SSB_Orchard_1_Újfehértó	Clubionidae	Clubiona sp.	Clubiona	juv				Sternorrhyncha	Sternorrhyncha	Aphididae	Dysaphis plantaginea		pest	larva, L4
413	2016.04.28.	2016	4	Spring	Szabolcs-Szatmár-Bereg	SSB_Orchard_1_Újfehértó	Clubionidae	Clubiona sp.	Clubiona	juv				Sternorrhyncha	Sternorrhyncha	Aphididae	Dysaphis plantaginea		pest	imago
414	2016.04.28.	2016	4	Spring	Szabolcs-Szatmár-Bereg	SSB_Orchard_1_Újfehértó	Philodromidae	Philodromus cespitum	Ph_cespitum	juv				Sternorrhyncha	Sternorrhyncha	Aphididae	Dysaphis plantaginea		pest	imago
415	2016.04.28.	2016	4	Spring	Szabolcs-Szatmár-Bereg	SSB_Orchard_1_Újfehértó	Clubionidae	Clubiona sp.	Clubiona	adult	Female			Sternorrhyncha	Sternorrhyncha	Aphididae	Dysaphis plantaginea		pest	imago
416	2016.05.03.	2016	5	Spring	Szabolcs-Szatmár-Bereg	SSB_Orchard_1_Újfehértó	Philodromidae	Philodromus cespitum	Ph_cespitum	juv				Sternorrhyncha	Sternorrhyncha	Aphididae	Dysaphis plantaginea		pest	imago
417	2016.10.21.	2016	10	Fall	Szabolcs-Szatmár-Bereg	SSB_Orchard_1_Újfehértó	Philodromidae	Philodromus cespitum	Ph_cespitum	juv		1.1	0.454545	Nematocera	Nematocera	Nematocera		0.5	neutral
418	2017.03.21.	2017	3	Spring	Szabolcs-Szatmár-Bereg	SSB_Orchard_1_Újfehértó	Clubionidae	Clubiona sp.	Clubiona	subadult	Female	1.6		Sternorrhyncha	Sternorrhyncha	Psyllidae	Cacopsylla sp.		pest	imago
419	2017.04.18.	2017	4	Spring	Szabolcs-Szatmár-Bereg	SSB_Orchard_1_Újfehértó	Thomisidae	Misumena vatia		juv		1.6	0.5	Sternorrhyncha	Sternorrhyncha	Psyllidae	Cacopsylla sp.	0.8	pest	imago
420	2017.04.18.	2017	4	Spring	Szabolcs-Szatmár-Bereg	SSB_Orchard_1_Újfehértó	Thomisidae	Ebrechtella tricuspidata	E_tricuspidata	subadult	Female	1.7	0.352941	Nematocera	Nematocera	Nematocera		0.6	neutral
421	2017.04.18.	2017	4	Spring	Szabolcs-Szatmár-Bereg	SSB_Orchard_1_Újfehértó	Thomisidae	Ebrechtella tricuspidata	E_tricuspidata	adult	Male	1.7	0.235294	Nematocera	Nematocera	Nematocera		0.4	neutral
422	2017.04.18.	2017	4	Spring	Szabolcs-Szatmár-Bereg	SSB_Orchard_1_Újfehértó	Philodromidae	Philodromus cespitum	Ph_cespitum	juv		1	1.3	Neuroptera	Other prey	Hemerobiidae		1.3	natural_enemy
423	2017.04.18.	2017	4	Spring	Szabolcs-Szatmár-Bereg	SSB_Orchard_1_Újfehértó	Philodromidae	Philodromus cespitum	Ph_cespitum	juv		1.1	1	Brachycera	Brachycera	Brachycera		1.1	neutral
424	2017.04.18.	2017	4	Spring	Szabolcs-Szatmár-Bereg	SSB_Orchard_1_Újfehértó	Philodromidae	Philodromus cespitum	Ph_cespitum	juv		1.1	0.545455	Nematocera	Nematocera	Nematocera		0.6	neutral
425	2017.04.18.	2017	4	Spring	Szabolcs-Szatmár-Bereg	SSB_Orchard_1_Újfehértó	Philodromidae	Philodromus cespitum	Ph_cespitum	juv		1.3	0.307692	Nematocera	Nematocera	Nematocera		0.4	neutral
426	2017.04.19.	2017	4	Spring	Szabolcs-Szatmár-Bereg	SSB_Orchard_1_Újfehértó	Thomisidae	Xysticus lanio	Xysticus	subadult	Female	2.3	0.869565	Araneae	Araneae	Clubionidae	Clubiona frutetorum	2	natural_enemy	adult male
427	2017.04.26.	2017	4	Spring	Bács-Kiskun	BK_Orchard_1	Thomisidae	Ebrechtella tricuspidata	E_tricuspidata	juv		1.6	0.6875	Nematocera	Nematocera	Nematocera		1.1	neutral
428	2017.04.26.	2017	4	Spring	Bács-Kiskun	BK_Orchard_1	Thomisidae	Tmarus piger		adult	Male	1.9	0.210526	Formicidae	Formicidae	Formicidae		0.4	neutral	worker
429	2017.05.11.	2017	5	Spring	Szabolcs-Szatmár-Bereg	SSB_Orchard_1_Újfehértó	Thomisidae	Tmarus piger		adult	Male	1.8	0.444444	Formicidae	Formicidae	Formicidae		0.8	neutral	worker
430	2017.05.11.	2017	5	Spring	Szabolcs-Szatmár-Bereg	SSB_Orchard_1_Újfehértó	Thomisidae	Tmarus piger		adult	Female	2.2	0.318182	Formicidae	Formicidae	Formicidae		0.7	neutral	worker
431	2017.05.11.	2017	5	Spring	Szabolcs-Szatmár-Bereg	SSB_Orchard_1_Újfehértó	Thomisidae	Tmarus piger		adult	Female	2.2	0.409091	Formicidae	Formicidae	Formicidae		0.9	neutral	worker
432	2017.05.11.	2017	5	Spring	Szabolcs-Szatmár-Bereg	SSB_Orchard_1_Újfehértó	Thomisidae	Tmarus piger		subadult	Female			Formicidae	Formicidae	Formicidae		0.8	neutral	worker
433	2017.05.11.	2017	5	Spring	Szabolcs-Szatmár-Bereg	SSB_Orchard_1_Újfehértó	Thomisidae	Synema globosum		subadult	Male	1.7	0.941176	Coleoptera	Coleoptera	Curculionidae	Phyllobius sp.	1.6	pest
434	2017.05.11.	2017	5	Spring	Szabolcs-Szatmár-Bereg	SSB_Orchard_1_Újfehértó	Thomisidae	Xysticus lanio	Xysticus	adult	Female	3.2	0.59375	Coleoptera	Coleoptera	Curculionidae	Phyllobius sp.	1.9	pest
435	2017.05.11.	2017	5	Spring	Szabolcs-Szatmár-Bereg	SSB_Orchard_1_Újfehértó	Thomisidae	Ebrechtella tricuspidata	E_tricuspidata	adult	Male	1.7	0.294118	Nematocera	Nematocera	Nematocera		0.5	neutral
436	2017.05.11.	2017	5	Spring	Szabolcs-Szatmár-Bereg	SSB_Orchard_1_Újfehértó	Thomisidae	Ebrechtella tricuspidata	E_tricuspidata	adult	Female	2.2	0.909091	Coleoptera	Coleoptera	Curculionidae	Phyllobius oblongus	2	pest
437	2017.05.11.	2017	5	Spring	Szabolcs-Szatmár-Bereg	SSB_Orchard_1_Újfehértó	Thomisidae	Ebrechtella tricuspidata	E_tricuspidata	adult	Female	2.5	0.72	Nematocera	Nematocera	Nematocera		1.8	neutral
438	2017.05.11.	2017	5	Spring	Szabolcs-Szatmár-Bereg	SSB_Orchard_1_Újfehértó	Thomisidae	Ebrechtella tricuspidata	E_tricuspidata	adult	Female	2.2	0.227273	Other Hymenoptera	Other Hymenoptera			0.5	natural_enemy	Hymenoptera parasitica
439	2017.05.11.	2017	5	Spring	Szabolcs-Szatmár-Bereg	SSB_Orchard_1_Újfehértó	Philodromidae	Philodromus cespitum	Ph_cespitum	subadult	Female	1.6	0.625	Brachycera	Brachycera	Brachycera		1	neutral
440	2017.05.11.	2017	5	Spring	Szabolcs-Szatmár-Bereg	SSB_Orchard_1_Újfehértó	Philodromidae	Philodromus cespitum	Ph_cespitum	subadult	Male	1.7	0.235294	Sternorrhyncha	Sternorrhyncha	Aphididae	Dysaphis devecta	0.4	pest
441	2017.05.11.	2017	5	Spring	Szabolcs-Szatmár-Bereg	SSB_Orchard_1_Újfehértó	Salticidae	Heliophanus auratus	Other_salticids	adult	Female	1.6	0.4375	Araneae	Araneae			0.7	natural_enemy
442	2017.05.11.	2017	5	Spring	Szabolcs-Szatmár-Bereg	SSB_Orchard_1_Újfehértó	Salticidae	Salticus scenicus	Other_salticids	adult	Male	1.5	0.266667	Nematocera	Nematocera	Nematocera		0.4	neutral
443	2017.05.11.	2017	5	Spring	Szabolcs-Szatmár-Bereg	SSB_Orchard_1_Újfehértó	Salticidae	Salticus scenicus	Other_salticids	adult	Male	1.6	0.375	Nematocera	Nematocera	Nematocera		0.6	neutral
444	2017.05.11.	2017	5	Spring	Szabolcs-Szatmár-Bereg	SSB_Orchard_1_Újfehértó	Salticidae	Carrhotus xanthogramma	C_xanthogramma	adult	Male			Araneae	Araneae	Thomisidae	Ebrechtella tricuspidata	1.5	natural_enemy	adult male
445	2017.05.11.	2017	5	Spring	Szabolcs-Szatmár-Bereg	SSB_Orchard_1_Újfehértó	Salticidae	Carrhotus xanthogramma	C_xanthogramma	adult	Female	2.7	0.555556	Coleoptera	Coleoptera	Curculionidae	Phyllobius sp.	1.5	pest
446	2017.05.11.	2017	5	Spring	Szabolcs-Szatmár-Bereg	SSB_Orchard_1_Újfehértó	Salticidae	Carrhotus xanthogramma	C_xanthogramma	adult	Male	2.9	0.551724	Coleoptera	Coleoptera	Curculionidae	Phyllobius oblongus	1.6	pest
447	2017.05.11.	2017	5	Spring	Szabolcs-Szatmár-Bereg	SSB_Orchard_1_Újfehértó	Salticidae	Carrhotus xanthogramma	C_xanthogramma	adult	Female	2.8	0.571429	Coleoptera	Coleoptera	Curculionidae	Phyllobius oblongus	1.6	pest
448	2017.05.11.	2017	5	Spring	Szabolcs-Szatmár-Bereg	SSB_Orchard_1_Újfehértó	Salticidae	Carrhotus xanthogramma	C_xanthogramma	adult	Female	2.7	0.592593	Coleoptera	Coleoptera	Curculionidae	Phyllobius sp.	1.6	pest
449	2017.05.11.	2017	5	Spring	Szabolcs-Szatmár-Bereg	SSB_Orchard_1_Újfehértó	Salticidae	Carrhotus xanthogramma	C_xanthogramma	adult	Female	2.7	0.703704	Coleoptera	Coleoptera	Curculionidae	Phyllobius sp.	1.9	pest
450	2017.05.11.	2017	5	Spring	Szabolcs-Szatmár-Bereg	SSB_Orchard_1_Újfehértó	Salticidae	Carrhotus xanthogramma	C_xanthogramma	adult	Female	2.8	0.821429	Auchenorrhyncha	Auchenorrhyncha	Cicadellidae	Penthimia nigra	2.3	neutral	imago
451	2017.05.11.	2017	5	Spring	Szabolcs-Szatmár-Bereg	SSB_Orchard_1_Újfehértó	Salticidae	Carrhotus xanthogramma	C_xanthogramma	adult	Female	2.9	0.586207	Neuroptera	Other prey	Chrysopidae		1.7	natural_enemy	imago
452	2017.05.11.	2017	5	Spring	Szabolcs-Szatmár-Bereg	SSB_Orchard_1_Újfehértó	Salticidae	Carrhotus xanthogramma	C_xanthogramma	adult	Female	2.7	0.37037	Brachycera	Brachycera	Brachycera		1	neutral
453	2017.05.11.	2017	5	Spring	Szabolcs-Szatmár-Bereg	SSB_Orchard_1_Újfehértó	Salticidae	Carrhotus xanthogramma	C_xanthogramma	juv		1.4	1.14286	Brachycera	Brachycera	Brachycera		1.6	neutral
454	2017.05.11.	2017	5	Spring	Szabolcs-Szatmár-Bereg	SSB_Orchard_1_Újfehértó	Salticidae	Carrhotus xanthogramma	C_xanthogramma	adult	Female	2.6	0.884615	Brachycera	Brachycera	Brachycera		2.3	neutral
455	2017.05.11.	2017	5	Spring	Szabolcs-Szatmár-Bereg	SSB_Orchard_1_Újfehértó	Salticidae	Carrhotus xanthogramma	C_xanthogramma	adult	Female	2.7	0.62963	Brachycera	Brachycera	Brachycera		1.7	neutral
456	2017.05.11.	2017	5	Spring	Szabolcs-Szatmár-Bereg	SSB_Orchard_1_Újfehértó	Salticidae	Carrhotus xanthogramma	C_xanthogramma	adult	Female	2.5	0.88	Brachycera	Brachycera	Brachycera		2.2	neutral
457	2017.05.11.	2017	5	Spring	Szabolcs-Szatmár-Bereg	SSB_Orchard_1_Újfehértó	Salticidae	Carrhotus xanthogramma	C_xanthogramma	adult	Female	2.8	0.928571	Brachycera	Brachycera	Brachycera		2.6	neutral
458	2017.05.11.	2017	5	Spring	Szabolcs-Szatmár-Bereg	SSB_Orchard_1_Újfehértó	Salticidae	Carrhotus xanthogramma	C_xanthogramma	subadult	Female	2.3	0.565217	Brachycera	Brachycera	Brachycera		1.3	neutral
459	2017.05.11.	2017	5	Spring	Szabolcs-Szatmár-Bereg	SSB_Orchard_1_Újfehértó	Salticidae	Carrhotus xanthogramma	C_xanthogramma	adult	Female	2.9	0.931034	Brachycera	Brachycera	Brachycera		2.7	neutral
460	2017.05.16.	2017	5	Spring	Szabolcs-Szatmár-Bereg	SSB_Orchard_1_Újfehértó	Salticidae	Carrhotus xanthogramma	C_xanthogramma	adult	Female	2.7	0.666667	Coleoptera	Coleoptera	Curculionidae	Phyllobius oblongus	1.8	pest
461	2017.05.17.	2017	5	Spring	Szabolcs-Szatmár-Bereg	SSB_Orchard_1_Újfehértó	Philodromidae	Philodromus cespitum	Ph_cespitum	juv		1.5	0.2	Sternorrhyncha	Sternorrhyncha	Aphididae		0.3	pest
462	2017.05.20.	2017	5	Spring	Szabolcs-Szatmár-Bereg	SSB_Orchard_1_Újfehértó	Salticidae	Carrhotus xanthogramma	C_xanthogramma	adult	Female	2.8	0.821429	Brachycera	Brachycera	Brachycera		2.3	neutral
463	2017.05.28.	2017	5	Spring	Szabolcs-Szatmár-Bereg	SSB_Orchard_1_Újfehértó	Philodromidae	Philodromus cespitum	Ph_cespitum	subadult	Female	2.1	0.666667	Nematocera	Nematocera	Nematocera	Culicidae sp.	1.4	neutral
464	2017.05.29.	2017	5	Spring	Szabolcs-Szatmár-Bereg	SSB_Orchard_1_Újfehértó	Thomisidae	Ebrechtella tricuspidata	E_tricuspidata	adult	Female	2.1	1.2381	Brachycera	Brachycera	Brachycera		2.6	neutral
465	2017.06.01.	2017	6	Summer	Szabolcs-Szatmár-Bereg	SSB_Orchard_1_Újfehértó	Thomisidae	Misumena vatia		adult	Female	3.1	0.806452	Brachycera	Brachycera	Brachycera		2.5	neutral
466	2017.06.01.	2017	6	Summer	Szabolcs-Szatmár-Bereg	SSB_Orchard_1_Újfehértó	Thomisidae	Misumena vatia		adult	Female	3	0.9	Brachycera	Brachycera	Brachycera		2.7	neutral
467	2017.06.22.	2017	6	Summer	Szabolcs-Szatmár-Bereg	SSB_Orchard_1_Újfehértó	Thomisidae	Ebrechtella tricuspidata	E_tricuspidata	adult	Female	2.2	0.227273	Sternorrhyncha	Sternorrhyncha	Aphididae	Aphis sp.	0.5	pest
468	2017.06.22.	2017	6	Summer	Szabolcs-Szatmár-Bereg	SSB_Orchard_1_Újfehértó	Thomisidae	Ebrechtella tricuspidata	E_tricuspidata	adult	Female	2.5	1.32	Brachycera	Brachycera	Brachycera		3.3	neutral
469	2017.06.22.	2017	6	Summer	Szabolcs-Szatmár-Bereg	SSB_Orchard_1_Újfehértó	Thomisidae	Misumena vatia		juv		1	0.6	Formicidae	Formicidae	Formicidae		0.6	neutral	worker
470	2017.06.22.	2017	6	Summer	Szabolcs-Szatmár-Bereg	SSB_Orchard_1_Újfehértó	Thomisidae	Xysticus sp.	Xysticus	juv		1.4	0.5	Formicidae	Formicidae	Formicidae		0.7	neutral	worker
471	2017.06.22.	2017	6	Summer	Szabolcs-Szatmár-Bereg	SSB_Orchard_1_Újfehértó	Oxyopidae	Oxyopes ramosus		adult	Female	2.7	1.18519	Coleoptera	Coleoptera	Melolonthidae	Omaloplia sp.	3.2	neutral
472	2017.06.22.	2017	6	Summer	Szabolcs-Szatmár-Bereg	SSB_Orchard_1_Újfehértó	Cheiracanthiidae	Cheiracanthium sp.		juv		1.7	0.352941	Sternorrhyncha	Sternorrhyncha	Aphididae	Aphis sp.	0.6	pest
473	2017.06.22.	2017	6	Summer	Szabolcs-Szatmár-Bereg	SSB_Orchard_1_Újfehértó	Clubionidae	Clubiona sp.	Clubiona	juv		0.7	0.857143	Nematocera	Nematocera	Nematocera		0.6	neutral
474	2017.06.22.	2017	6	Summer	Szabolcs-Szatmár-Bereg	SSB_Orchard_1_Újfehértó	Clubionidae	Clubiona sp.	Clubiona	juv		0.8	0.5	Sternorrhyncha	Sternorrhyncha	Aphididae	Aphis sp.	0.4	pest
475	2017.06.22.	2017	6	Summer	Szabolcs-Szatmár-Bereg	SSB_Orchard_1_Újfehértó	Philodromidae	Philodromus cespitum	Ph_cespitum	adult	Female	2	0.25	Sternorrhyncha	Sternorrhyncha	Aphididae		0.5	pest
476	2017.06.22.	2017	6	Summer	Szabolcs-Szatmár-Bereg	SSB_Orchard_1_Újfehértó	Philodromidae	Philodromus cespitum	Ph_cespitum	adult	Female	2.2	0.227273	Nematocera	Nematocera	Nematocera		0.5	neutral
477	2017.06.22.	2017	6	Summer	Szabolcs-Szatmár-Bereg	SSB_Orchard_1_Újfehértó	Philodromidae	Philodromus cespitum	Ph_cespitum	adult	Female	2	0.25	Sternorrhyncha	Sternorrhyncha	Aphididae	Aphis sp.	0.5	pest
478	2017.06.22.	2017	6	Summer	Szabolcs-Szatmár-Bereg	SSB_Orchard_1_Újfehértó	Philodromidae	Philodromus cespitum	Ph_cespitum	adult	Female	2.2	0.909091	Brachycera	Brachycera	Brachycera		2	neutral
479	2017.06.22.	2017	6	Summer	Szabolcs-Szatmár-Bereg	SSB_Orchard_1_Újfehértó	Philodromidae	Philodromus cespitum	Ph_cespitum	subadult	Female	1.8	0.333333	Sternorrhyncha	Sternorrhyncha	Aphididae		0.6	pest	imago, winged
480	2017.06.22.	2017	6	Summer	Szabolcs-Szatmár-Bereg	SSB_Orchard_1_Újfehértó	Salticidae	Heliophanus auratus	Other_salticids	adult	Male	1.6	0.4375	Sternorrhyncha	Sternorrhyncha	Aphididae		0.7	pest	imago, winged
481	2017.06.22.	2017	6	Summer	Szabolcs-Szatmár-Bereg	SSB_Orchard_1_Újfehértó	Salticidae	Pseudicius encarpatus	Other_salticids	adult	Female	1.8	0.333333	Sternorrhyncha	Sternorrhyncha	Aphididae		0.6	pest
482	2017.06.22.	2017	6	Summer	Szabolcs-Szatmár-Bereg	SSB_Orchard_1_Újfehértó	Salticidae	Pseudicius encarpatus	Other_salticids	adult	Female	1.9	0.368421	Sternorrhyncha	Sternorrhyncha	Aphididae		0.7	pest
483	2017.06.22.	2017	6	Summer	Szabolcs-Szatmár-Bereg	SSB_Orchard_1_Újfehértó	Salticidae	Carrhotus xanthogramma	C_xanthogramma	adult	Female	2.8	0.25	Sternorrhyncha	Sternorrhyncha	Aphididae		0.7	pest	imago, winged
484	2017.06.22.	2017	6	Summer	Szabolcs-Szatmár-Bereg	SSB_Orchard_1_Újfehértó	Salticidae	Carrhotus xanthogramma	C_xanthogramma	juv		1.1	0.636364	Sternorrhyncha	Sternorrhyncha	Aphididae		0.7	pest
485	2017.06.22.	2017	6	Summer	Szabolcs-Szatmár-Bereg	SSB_Orchard_1_Újfehértó	Salticidae	Carrhotus xanthogramma	C_xanthogramma	juv		1.1	0.454545	Sternorrhyncha	Sternorrhyncha	Aphididae		0.5	pest
486	2017.06.22.	2017	6	Summer	Szabolcs-Szatmár-Bereg	SSB_Orchard_1_Újfehértó	Salticidae	Carrhotus xanthogramma	C_xanthogramma	juv		1.1	0.454545	Sternorrhyncha	Sternorrhyncha	Aphididae	Aphis sp.	0.5	pest
487	2017.06.22.	2017	6	Summer	Szabolcs-Szatmár-Bereg	SSB_Orchard_1_Újfehértó	Salticidae	Carrhotus xanthogramma	C_xanthogramma	juv		1.1	0.454545	Brachycera	Brachycera	Brachycera		0.5	neutral
488	2017.06.22.	2017	6	Summer	Szabolcs-Szatmár-Bereg	SSB_Orchard_1_Újfehértó	Salticidae	Carrhotus xanthogramma	C_xanthogramma	juv		1.2	0.75	Brachycera	Brachycera	Brachycera		0.9	neutral
489	2017.06.22.	2017	6	Summer	Szabolcs-Szatmár-Bereg	SSB_Orchard_1_Újfehértó	Salticidae	Carrhotus xanthogramma	C_xanthogramma	juv		1.2	0.416667	Sternorrhyncha	Sternorrhyncha	Aphididae	Aphis sp.	0.5	pest
490	2017.06.22.	2017	6	Summer	Szabolcs-Szatmár-Bereg	SSB_Orchard_1_Újfehértó	Salticidae	Carrhotus xanthogramma	C_xanthogramma	juv		1.2	0.416667	Nematocera	Nematocera	Nematocera		0.5	neutral
491	2017.06.22.	2017	6	Summer	Szabolcs-Szatmár-Bereg	SSB_Orchard_1_Újfehértó	Salticidae	Carrhotus xanthogramma	C_xanthogramma	juv		1.1	0.545455	Sternorrhyncha	Sternorrhyncha	Aphididae		0.6	pest
492	2017.06.22.	2017	6	Summer	Szabolcs-Szatmár-Bereg	SSB_Orchard_1_Újfehértó	Salticidae	Carrhotus xanthogramma	C_xanthogramma	juv		1.1	0.454545	Sternorrhyncha	Sternorrhyncha	Aphididae		0.5	pest	imago, winged
493	2017.06.22.	2017	6	Summer	Szabolcs-Szatmár-Bereg	SSB_Orchard_1_Újfehértó	Salticidae	Carrhotus xanthogramma	C_xanthogramma	juv		1.1	0.727273	Sternorrhyncha	Sternorrhyncha	Aphididae	Dysaphis sp.	0.8	pest
494	2017.06.22.	2017	6	Summer	Szabolcs-Szatmár-Bereg	SSB_Orchard_1_Újfehértó	Salticidae	Carrhotus xanthogramma	C_xanthogramma	juv		1.2	0.333333	Nematocera	Nematocera	Nematocera		0.4	neutral
495	2017.06.22.	2017	6	Summer	Szabolcs-Szatmár-Bereg	SSB_Orchard_1_Újfehértó	Salticidae	Carrhotus xanthogramma	C_xanthogramma	juv		1.2	0.416667	Sternorrhyncha	Sternorrhyncha	Aphididae		0.5	pest	imago, winged
496	2017.06.22.	2017	6	Summer	Szabolcs-Szatmár-Bereg	SSB_Orchard_1_Újfehértó	Salticidae	Carrhotus xanthogramma	C_xanthogramma	juv		1.1	0.454545	Nematocera	Nematocera	Nematocera		0.5	neutral
497	2017.06.22.	2017	6	Summer	Szabolcs-Szatmár-Bereg	SSB_Orchard_1_Újfehértó	Salticidae	Carrhotus xanthogramma	C_xanthogramma	juv		1.1	0.363636	Nematocera	Nematocera	Nematocera		0.4	neutral
498	2017.06.22.	2017	6	Summer	Szabolcs-Szatmár-Bereg	SSB_Orchard_1_Újfehértó	Salticidae	Carrhotus xanthogramma	C_xanthogramma	juv		1.2	0.583333	Brachycera	Brachycera	Brachycera		0.7	neutral
499	2017.06.22.	2017	6	Summer	Szabolcs-Szatmár-Bereg	SSB_Orchard_1_Újfehértó	Salticidae	Carrhotus xanthogramma	C_xanthogramma	juv		1.1	0.909091	Formicidae	Formicidae	Formicidae	Lasius niger	1	neutral	winged male
500	2017.06.22.	2017	6	Summer	Szabolcs-Szatmár-Bereg	SSB_Orchard_1_Újfehértó	Salticidae	Carrhotus xanthogramma	C_xanthogramma	juv		1.2	0.666667	Brachycera	Brachycera	Brachycera		0.8	neutral
501	2017.06.22.	2017	6	Summer	Szabolcs-Szatmár-Bereg	SSB_Orchard_1_Újfehértó	Salticidae	Carrhotus xanthogramma	C_xanthogramma	juv		1.2	0.916667	Brachycera	Brachycera	Brachycera		1.1	neutral
502	2017.06.22.	2017	6	Summer	Szabolcs-Szatmár-Bereg	SSB_Orchard_1_Újfehértó	Salticidae	Carrhotus xanthogramma	C_xanthogramma	juv		1.1	0.454545	Nematocera	Nematocera	Nematocera		0.5	neutral
503	2017.06.22.	2017	6	Summer	Szabolcs-Szatmár-Bereg	SSB_Orchard_1_Újfehértó	Salticidae	Carrhotus xanthogramma	C_xanthogramma	juv		1.1	0.545455	Sternorrhyncha	Sternorrhyncha	Aphididae		0.6	pest	imago, winged
504	2017.06.22.	2017	6	Summer	Szabolcs-Szatmár-Bereg	SSB_Orchard_1_Újfehértó	Salticidae	Carrhotus xanthogramma	C_xanthogramma	juv		1.3		Sternorrhyncha	Sternorrhyncha	Aphididae			pest	imago, winged
505	2017.06.22.	2017	6	Summer	Szabolcs-Szatmár-Bereg	SSB_Orchard_1_Újfehértó	Salticidae	Carrhotus xanthogramma	C_xanthogramma	juv		1.2	0.666667	Sternorrhyncha	Sternorrhyncha	Aphididae	Dysaphis sp.	0.8	pest
506	2017.07.05.	2017	7	Summer	Szabolcs-Szatmár-Bereg	SSB_Orchard_1_Újfehértó	Pisauridae	Pisaura mirabilis		adult	Female			Coleoptera	Coleoptera	Coccinellidae	Adalia decempunctata		natural_enemy
507	2017.07.05.	2017	7	Summer	Szabolcs-Szatmár-Bereg	SSB_Orchard_1_Újfehértó	Thomisidae	Xysticus sp.	Xysticus	juv		1.4	0.428571	Formicidae	Formicidae	Formicidae		0.6	neutral	worker
508	2017.07.05.	2017	7	Summer	Szabolcs-Szatmár-Bereg	SSB_Orchard_1_Újfehértó	Thomisidae	Misumena vatia		juv		0.8	0.625	Other Hymenoptera	Other Hymenoptera			0.5	natural_enemy	Hymenoptera parasitica
509	2017.07.04.	2017	7	Summer	Szabolcs-Szatmár-Bereg	SSB_Orchard_1_Újfehértó	Thomisidae	Tmarus piger		juv		1.1	0.636364	Formicidae	Formicidae	Formicidae		0.7	neutral	worker
510	2017.07.05.	2017	7	Summer	Szabolcs-Szatmár-Bereg	SSB_Orchard_1_Újfehértó	Philodromidae	Philodromus cespitum	Ph_cespitum	juv		0.8	0.875	Nematocera	Nematocera	Nematocera		0.7	neutral
511	2017.07.06.	2017	7	Summer	Szabolcs-Szatmár-Bereg	SSB_Orchard_1_Újfehértó	Philodromidae	Philodromus cespitum	Ph_cespitum	adult	Female	2	1	Araneae	Araneae	Philodromidae	Philodromus cespitum	2	natural_enemy
512	2017.07.05.	2017	7	Summer	Szabolcs-Szatmár-Bereg	SSB_Orchard_1_Újfehértó	Philodromidae	Philodromus cespitum	Ph_cespitum	adult	Female	2.2	0.727273	Nematocera	Nematocera	Nematocera		1.6	neutral
513	2017.07.03.	2017	7	Summer	Szabolcs-Szatmár-Bereg	SSB_Orchard_1_Újfehértó	Philodromidae	Philodromus cespitum	Ph_cespitum	adult	Male	2.1	0.714286	Nematocera	Nematocera	Nematocera		1.5	neutral
514	2017.07.05.	2017	7	Summer	Szabolcs-Szatmár-Bereg	SSB_Orchard_1_Újfehértó	Philodromidae	Philodromus cespitum	Ph_cespitum	adult	Female	2	0.25	Nematocera	Nematocera	Nematocera		0.5	neutral
515	2017.07.04.	2017	7	Summer	Szabolcs-Szatmár-Bereg	SSB_Orchard_1_Újfehértó	Clubionidae	Clubiona sp.	Clubiona	juv		0.8	1.5	Formicidae	Formicidae	Formicidae	Lasius niger	1.2	neutral	winged male
516	2017.07.04.	2017	7	Summer	Szabolcs-Szatmár-Bereg	SSB_Orchard_1_Újfehértó	Salticidae	Carrhotus xanthogramma	C_xanthogramma	juv				Sternorrhyncha	Sternorrhyncha	Aphididae	Aphis sp.	0.7	pest
517	2017.07.04.	2017	7	Summer	Szabolcs-Szatmár-Bereg	SSB_Orchard_1_Újfehértó	Salticidae	Carrhotus xanthogramma	C_xanthogramma	juv		1.2	1	Formicidae	Formicidae	Formicidae	Lasius niger	1.2	neutral	winged male
518	2017.07.04.	2017	7	Summer	Szabolcs-Szatmár-Bereg	SSB_Orchard_1_Újfehértó	Salticidae	Carrhotus xanthogramma	C_xanthogramma	juv		1.2	0.5	Sternorrhyncha	Sternorrhyncha	Aphididae	Aphis sp.	0.6	pest
519	2017.07.04.	2017	7	Summer	Szabolcs-Szatmár-Bereg	SSB_Orchard_1_Újfehértó	Salticidae	Carrhotus xanthogramma	C_xanthogramma	juv		1.2	0.5	Sternorrhyncha	Sternorrhyncha	Aphididae		0.6	pest
520	2017.07.04.	2017	7	Summer	Szabolcs-Szatmár-Bereg	SSB_Orchard_1_Újfehértó	Salticidae	Carrhotus xanthogramma	C_xanthogramma	juv		1.4	0.857143	Formicidae	Formicidae	Formicidae	Lasius niger	1.2	neutral	winged male
521	2017.07.04.	2017	7	Summer	Szabolcs-Szatmár-Bereg	SSB_Orchard_1_Újfehértó	Salticidae	Carrhotus xanthogramma	C_xanthogramma	juv		1.2	0.75	Brachycera	Brachycera	Brachycera		0.9	neutral
522	2017.07.05.	2017	7	Summer	Szabolcs-Szatmár-Bereg	SSB_Orchard_1_Újfehértó	Salticidae	Carrhotus xanthogramma	C_xanthogramma	juv		1.2	0.5	Araneae	Araneae			0.6	natural_enemy
523	2017.07.05.	2017	7	Summer	Szabolcs-Szatmár-Bereg	SSB_Orchard_1_Újfehértó	Salticidae	Carrhotus xanthogramma	C_xanthogramma	juv		1.2	0.25	Sternorrhyncha	Sternorrhyncha	Aphididae		0.3	pest
524	2017.07.05.	2017	7	Summer	Szabolcs-Szatmár-Bereg	SSB_Orchard_1_Újfehértó	Salticidae	Carrhotus xanthogramma	C_xanthogramma	juv		1.3	0.923077	Formicidae	Formicidae	Formicidae	Lasius niger	1.2	neutral	winged male
525	2017.07.04.	2017	7	Summer	Szabolcs-Szatmár-Bereg	SSB_Orchard_1_Újfehértó	Salticidae	Carrhotus xanthogramma	C_xanthogramma	juv		1.3	0.461538	Sternorrhyncha	Sternorrhyncha	Aphididae	Aphis sp.	0.6	pest
526	2017.07.05.	2017	7	Summer	Szabolcs-Szatmár-Bereg	SSB_Orchard_1_Újfehértó	Salticidae	Carrhotus xanthogramma	C_xanthogramma	juv		1.4	0.714286	Brachycera	Brachycera	Brachycera		1	neutral
527	2017.07.04.	2017	7	Summer	Szabolcs-Szatmár-Bereg	SSB_Orchard_1_Újfehértó	Salticidae	Carrhotus xanthogramma	C_xanthogramma	juv		1.5	0.666667	Brachycera	Brachycera	Brachycera		1	neutral
528	2017.07.06.	2017	7	Summer	Szabolcs-Szatmár-Bereg	SSB_Orchard_1_Újfehértó	Salticidae	Carrhotus xanthogramma	C_xanthogramma	juv		1.5	0.533333	Brachycera	Brachycera	Brachycera		0.8	neutral
529	2017.07.04.	2017	7	Summer	Szabolcs-Szatmár-Bereg	SSB_Orchard_1_Újfehértó	Salticidae	Carrhotus xanthogramma	C_xanthogramma	juv		1.2	0.916667	Formicidae	Formicidae	Formicidae	Lasius niger	1.1	neutral	winged male
530	2017.07.04.	2017	7	Summer	Szabolcs-Szatmár-Bereg	SSB_Orchard_1_Újfehértó	Salticidae	Carrhotus xanthogramma	C_xanthogramma	juv		1.1	0.363636	Araneae	Araneae			0.4	natural_enemy
531	2017.07.04.	2017	7	Summer	Szabolcs-Szatmár-Bereg	SSB_Orchard_1_Újfehértó	Salticidae	Carrhotus xanthogramma	C_xanthogramma	juv		1.5	0.333333	Sternorrhyncha	Sternorrhyncha	Aphididae	Aphis sp.	0.5	pest
532	2017.07.04.	2017	7	Summer	Szabolcs-Szatmár-Bereg	SSB_Orchard_1_Újfehértó	Salticidae	Carrhotus xanthogramma	C_xanthogramma	juv		1.2	0.916667	Formicidae	Formicidae	Formicidae	Lasius niger	1.1	neutral	winged male
533	2017.07.04.	2017	7	Summer	Szabolcs-Szatmár-Bereg	SSB_Orchard_1_Újfehértó	Salticidae	Carrhotus xanthogramma	C_xanthogramma	juv		1.3	0.923077	Formicidae	Formicidae	Formicidae	Lasius niger	1.2	neutral	winged male
534	2017.07.04.	2017	7	Summer	Szabolcs-Szatmár-Bereg	SSB_Orchard_1_Újfehértó	Salticidae	Carrhotus xanthogramma	C_xanthogramma	juv		1.3	0.384615	Nematocera	Nematocera	Nematocera		0.5	neutral
535	2017.07.05.	2017	7	Summer	Szabolcs-Szatmár-Bereg	SSB_Orchard_1_Újfehértó	Salticidae	Carrhotus xanthogramma	C_xanthogramma	juv		1.4	0.857143	Formicidae	Formicidae	Formicidae	Lasius niger	1.2	neutral	winged male
536	2017.07.04.	2017	7	Summer	Szabolcs-Szatmár-Bereg	SSB_Orchard_1_Újfehértó	Salticidae	Carrhotus xanthogramma	C_xanthogramma	juv		1.2	0.333333	Other Hymenoptera	Other Hymenoptera			0.4	natural_enemy	Hymenoptera parasitica
537	2017.07.04.	2017	7	Summer	Szabolcs-Szatmár-Bereg	SSB_Orchard_1_Újfehértó	Salticidae	Carrhotus xanthogramma	C_xanthogramma	juv		1.3	0.923077	Formicidae	Formicidae	Formicidae	Lasius niger	1.2	neutral	winged male
538	2017.07.05.	2017	7	Summer	Szabolcs-Szatmár-Bereg	SSB_Orchard_1_Újfehértó	Salticidae	Carrhotus xanthogramma	C_xanthogramma	juv		1.2	0.416667	Nematocera	Nematocera	Nematocera		0.5	neutral
539	2017.07.04.	2017	7	Summer	Szabolcs-Szatmár-Bereg	SSB_Orchard_1_Újfehértó	Salticidae	Carrhotus xanthogramma	C_xanthogramma	juv		1.2	0.916667	Formicidae	Formicidae	Formicidae	Lasius niger	1.1	neutral	winged male
540	2017.07.04.	2017	7	Summer	Szabolcs-Szatmár-Bereg	SSB_Orchard_1_Újfehértó	Salticidae	Carrhotus xanthogramma	C_xanthogramma	juv		1.2	0.833333	Brachycera	Brachycera	Brachycera		1	neutral
541	2017.07.04.	2017	7	Summer	Szabolcs-Szatmár-Bereg	SSB_Orchard_1_Újfehértó	Salticidae	Carrhotus xanthogramma	C_xanthogramma	juv		1.3	0.923077	Formicidae	Formicidae	Formicidae	Lasius niger	1.2	neutral	winged male
542	2017.07.06.	2017	7	Summer	Szabolcs-Szatmár-Bereg	SSB_Orchard_1_Újfehértó	Salticidae	Carrhotus xanthogramma	C_xanthogramma	juv		1.4	0.571429	Brachycera	Brachycera	Brachycera		0.8	neutral
543	2017.07.04.	2017	7	Summer	Szabolcs-Szatmár-Bereg	SSB_Orchard_1_Újfehértó	Salticidae	Carrhotus xanthogramma	C_xanthogramma	juv		1.5	0.8	Formicidae	Formicidae	Formicidae	Lasius niger	1.2	neutral	winged male
544	2017.07.04.	2017	7	Summer	Szabolcs-Szatmár-Bereg	SSB_Orchard_1_Újfehértó	Salticidae	Carrhotus xanthogramma	C_xanthogramma	juv		1.2	1	Formicidae	Formicidae	Formicidae	Lasius niger	1.2	neutral	winged male
545	2017.07.06.	2017	7	Summer	Szabolcs-Szatmár-Bereg	SSB_Orchard_1_Újfehértó	Salticidae	Carrhotus xanthogramma	C_xanthogramma	juv		1.5	0.866667	Formicidae	Formicidae	Formicidae	Lasius niger	1.3	neutral	winged male
546	2017.07.04.	2017	7	Summer	Szabolcs-Szatmár-Bereg	SSB_Orchard_1_Újfehértó	Salticidae	Carrhotus xanthogramma	C_xanthogramma	juv		1.5	0.8	Formicidae	Formicidae	Formicidae	Lasius niger	1.2	neutral	winged male
547	2017.07.04.	2017	7	Summer	Szabolcs-Szatmár-Bereg	SSB_Orchard_1_Újfehértó	Salticidae	Carrhotus xanthogramma	C_xanthogramma	juv		1.6	0.9375	Brachycera	Brachycera	Syrphidae	Syrphidae sp.	1.5	natural_enemy	imago
548	2017.07.04.	2017	7	Summer	Szabolcs-Szatmár-Bereg	SSB_Orchard_1_Újfehértó	Salticidae	Carrhotus xanthogramma	C_xanthogramma	juv		1.2		Psocoptera	Other prey				neutral
549	2017.07.04.	2017	7	Summer	Szabolcs-Szatmár-Bereg	SSB_Orchard_1_Újfehértó	Salticidae	Carrhotus xanthogramma	C_xanthogramma	juv		1.3	0.846154	Formicidae	Formicidae	Formicidae	Lasius niger	1.1	neutral	winged male
550	2017.07.05.	2017	7	Summer	Szabolcs-Szatmár-Bereg	SSB_Orchard_1_Újfehértó	Salticidae	Carrhotus xanthogramma	C_xanthogramma	juv		1.2	0.833333	Formicidae	Formicidae	Formicidae	Lasius niger	1	neutral	winged male
551	2017.07.05.	2017	7	Summer	Szabolcs-Szatmár-Bereg	SSB_Orchard_1_Újfehértó	Salticidae	Carrhotus xanthogramma	C_xanthogramma	juv		1.4	0.642857	Ephemeroptera	Other prey			0.9	neutral
552	2017.07.05.	2017	7	Summer	Szabolcs-Szatmár-Bereg	SSB_Orchard_1_Újfehértó	Salticidae	Carrhotus xanthogramma	C_xanthogramma	juv		1.2	0.5	Brachycera	Brachycera	Brachycera		0.6	neutral
553	2017.07.06.	2017	7	Summer	Szabolcs-Szatmár-Bereg	SSB_Orchard_1_Újfehértó	Salticidae	Carrhotus xanthogramma	C_xanthogramma	juv		1.2	0.583333	Nematocera	Nematocera	Nematocera		0.7	neutral
554	2017.07.14.	2017	7	Summer	Bács-Kiskun	BK_Orchard_1	Thomisidae	Xysticus sp.	Xysticus	juv		1.7	0.411765	Formicidae	Formicidae	Formicidae		0.7	neutral	worker
555	2017.07.12.	2017	7	Summer	Szabolcs-Szatmár-Bereg	SSB_Orchard_1_Újfehértó	Thomisidae	Xysticus kochi	Xysticus	juv		1.1	0.454545	Nematocera	Nematocera	Nematocera		0.5	neutral
556	2017.07.13.	2017	7	Summer	Szabolcs-Szatmár-Bereg	SSB_Orchard_1_Újfehértó	Thomisidae	Misumena vatia		juv		0.9	0.777778	Brachycera	Brachycera	Brachycera		0.7	neutral
557	2017.07.10.	2017	7	Summer	Szabolcs-Szatmár-Bereg	SSB_Orchard_1_Újfehértó	Thomisidae	Misumena vatia		adult	Female	3.1	0.741935	Other Hymenoptera	Other Hymenoptera	Apoidea		2.3	neutral
558	2017.07.13.	2017	7	Summer	Szabolcs-Szatmár-Bereg	SSB_Orchard_1_Újfehértó	Philodromidae	Philodromus cespitum	Ph_cespitum	adult	Female	2.3	0.347826	Neuroptera	Other prey	Chrysopidae		0.8	natural_enemy	larva
559	2017.07.13.	2017	7	Summer	Szabolcs-Szatmár-Bereg	SSB_Orchard_1_Újfehértó	Salticidae	Salticus scenicus	Other_salticids	subadult	Female	1.4	0.571429	Other Hymenoptera	Other Hymenoptera			0.8	natural_enemy	Hymenoptera parasitica
560	2017.07.10.	2017	7	Summer	Szabolcs-Szatmár-Bereg	SSB_Orchard_1_Újfehértó	Salticidae	Carrhotus xanthogramma	C_xanthogramma	juv				Brachycera	Brachycera	Brachycera		1.8	neutral
561	2017.07.13.	2017	7	Summer	Szabolcs-Szatmár-Bereg	SSB_Orchard_1_Újfehértó	Salticidae	Carrhotus xanthogramma	C_xanthogramma	juv		1.6	0.5	Nematocera	Nematocera	Nematocera		0.8	neutral
562	2017.07.11.	2017	7	Summer	Szabolcs-Szatmár-Bereg	SSB_Orchard_1_Újfehértó	Salticidae	Carrhotus xanthogramma	C_xanthogramma	juv		1.5	0.8	Brachycera	Brachycera	Brachycera		1.2	neutral
563	2017.07.12.	2017	7	Summer	Szabolcs-Szatmár-Bereg	SSB_Orchard_1_Újfehértó	Salticidae	Carrhotus xanthogramma	C_xanthogramma	juv		1.4	0.928571	Ephemeroptera	Other prey			1.3	neutral
564	2017.07.11.	2017	7	Summer	Szabolcs-Szatmár-Bereg	SSB_Orchard_1_Újfehértó	Salticidae	Carrhotus xanthogramma	C_xanthogramma	juv		1.5	0.733333	Araneae	Araneae	Salticidae	Carrhotus xanthogramma	1.1	natural_enemy
565	2017.07.12.	2017	7	Summer	Szabolcs-Szatmár-Bereg	SSB_Orchard_1_Újfehértó	Salticidae	Carrhotus xanthogramma	C_xanthogramma	juv		1.4	1.5	Brachycera	Brachycera	Brachycera		2.1	neutral
566	2017.07.10.	2017	7	Summer	Szabolcs-Szatmár-Bereg	SSB_Orchard_1_Újfehértó	Salticidae	Carrhotus xanthogramma	C_xanthogramma	juv		1.6	0.6875	Brachycera	Brachycera	Brachycera		1.1	neutral
567	2017.07.12.	2017	7	Summer	Szabolcs-Szatmár-Bereg	SSB_Orchard_1_Újfehértó	Salticidae	Carrhotus xanthogramma	C_xanthogramma	juv		1.2	0.416667	Nematocera	Nematocera	Nematocera		0.5	neutral
568	2017.07.13.	2017	7	Summer	Szabolcs-Szatmár-Bereg	SSB_Orchard_1_Újfehértó	Salticidae	Carrhotus xanthogramma	C_xanthogramma	juv		1.6	1.0625	Brachycera	Brachycera	Syrphidae	Syrphidae sp.	1.7	natural_enemy	imago
569	2017.07.13.	2017	7	Summer	Szabolcs-Szatmár-Bereg	SSB_Orchard_1_Újfehértó	Salticidae	Carrhotus xanthogramma	C_xanthogramma	juv		1.5	0.333333	Sternorrhyncha	Sternorrhyncha	Aphididae		0.5	pest	imago, winged
570	2017.07.12.	2017	7	Summer	Szabolcs-Szatmár-Bereg	SSB_Orchard_1_Újfehértó	Salticidae	Carrhotus xanthogramma	C_xanthogramma	juv		1.6	0.5	Araneae	Araneae	Linyphiidae	Porrhomma microphthalmum	0.8	natural_enemy	adult male
571	2017.07.12.	2017	7	Summer	Szabolcs-Szatmár-Bereg	SSB_Orchard_1_Újfehértó	Salticidae	Carrhotus xanthogramma	C_xanthogramma	juv		1.6	0.6875	Formicidae	Formicidae	Formicidae	Lasius niger	1.1	neutral	winged male
572	2017.07.11.	2017	7	Summer	Szabolcs-Szatmár-Bereg	SSB_Orchard_1_Újfehértó	Salticidae	Carrhotus xanthogramma	C_xanthogramma	juv		1.5	1.06667	Brachycera	Brachycera	Syrphidae	Syrphidae sp.	1.6	natural_enemy	imago
573	2017.07.10.	2017	7	Summer	Szabolcs-Szatmár-Bereg	SSB_Orchard_1_Újfehértó	Salticidae	Carrhotus xanthogramma	C_xanthogramma	juv		1.5	0.333333	Other Hymenoptera	Other Hymenoptera			0.5	natural_enemy	Hymenoptera parasitica
574	2017.07.11.	2017	7	Summer	Szabolcs-Szatmár-Bereg	SSB_Orchard_1_Újfehértó	Salticidae	Carrhotus xanthogramma	C_xanthogramma	juv		1.5	0.466667	Nematocera	Nematocera	Nematocera		0.7	neutral
575	2017.07.12.	2017	7	Summer	Szabolcs-Szatmár-Bereg	SSB_Orchard_1_Újfehértó	Salticidae	Carrhotus xanthogramma	C_xanthogramma	juv		1.6	0.25	Lepidoptera	Lepidoptera	cf. Tortricidae		0.4	pest	larva
576	2017.07.12.	2017	7	Summer	Szabolcs-Szatmár-Bereg	SSB_Orchard_1_Újfehértó	Salticidae	Carrhotus xanthogramma	C_xanthogramma	juv		1.4	0.714286	Brachycera	Brachycera	Brachycera		1	neutral
577	2017.07.13.	2017	7	Summer	Szabolcs-Szatmár-Bereg	SSB_Orchard_1_Újfehértó	Salticidae	Carrhotus xanthogramma	C_xanthogramma	juv		1.5	0.466667	Brachycera	Brachycera	Brachycera		0.7	neutral
578	2017.07.11.	2017	7	Summer	Szabolcs-Szatmár-Bereg	SSB_Orchard_1_Újfehértó	Salticidae	Carrhotus xanthogramma	C_xanthogramma	juv		1.4		Nematocera	Nematocera	Nematocera			neutral
579	2017.07.10.	2017	7	Summer	Szabolcs-Szatmár-Bereg	SSB_Orchard_1_Újfehértó	Salticidae	Carrhotus xanthogramma	C_xanthogramma	juv		1.3	0.384615	Sternorrhyncha	Sternorrhyncha	Aphididae		0.5	pest
580	2017.07.10.	2017	7	Summer	Szabolcs-Szatmár-Bereg	SSB_Orchard_1_Újfehértó	Salticidae	Carrhotus xanthogramma	C_xanthogramma	juv		1.6	0.25	Nematocera	Nematocera	Nematocera		0.4	neutral
581	2017.07.12.	2017	7	Summer	Szabolcs-Szatmár-Bereg	SSB_Orchard_1_Újfehértó	Salticidae	Carrhotus xanthogramma	C_xanthogramma	juv		1.5	0.466667	Lepidoptera	Lepidoptera	cf. Tortricidae		0.7	pest	larva
582	2017.07.12.	2017	7	Summer	Szabolcs-Szatmár-Bereg	SSB_Orchard_1_Újfehértó	Salticidae	Carrhotus xanthogramma	C_xanthogramma	juv		1.6	0.25	Sternorrhyncha	Sternorrhyncha	Aphididae	Aphis sp.	0.4	pest
583	2017.07.12.	2017	7	Summer	Szabolcs-Szatmár-Bereg	SSB_Orchard_1_Újfehértó	Salticidae	Carrhotus xanthogramma	C_xanthogramma	juv		1.5	0.2	Sternorrhyncha	Sternorrhyncha	Aphididae	Aphis sp.	0.3	pest
584	2017.07.10.	2017	7	Summer	Szabolcs-Szatmár-Bereg	SSB_Orchard_1_Újfehértó	Salticidae	Carrhotus xanthogramma	C_xanthogramma	juv		1.4	0.5	Sternorrhyncha	Sternorrhyncha	Aphididae	Aphis sp.	0.7	pest	imago, winged
585	2017.07.12.	2017	7	Summer	Szabolcs-Szatmár-Bereg	SSB_Orchard_1_Újfehértó	Salticidae	Carrhotus xanthogramma	C_xanthogramma	juv		1.4	0.357143	Neuroptera	Other prey	Chrysopidae		0.5	natural_enemy	eggs
586	2017.07.12.	2017	7	Summer	Szabolcs-Szatmár-Bereg	SSB_Orchard_1_Újfehértó	Salticidae	Carrhotus xanthogramma	C_xanthogramma	juv		1.4	0.428571	Sternorrhyncha	Sternorrhyncha	Aphididae	Aphis sp.	0.6	pest	imago, winged
587	2017.07.12.	2017	7	Summer	Szabolcs-Szatmár-Bereg	SSB_Orchard_1_Újfehértó	Salticidae	Carrhotus xanthogramma	C_xanthogramma	juv		1.5	0.4	Nematocera	Nematocera	Nematocera		0.6	neutral
588	2017.07.10.	2017	7	Summer	Szabolcs-Szatmár-Bereg	SSB_Orchard_1_Újfehértó	Salticidae	Carrhotus xanthogramma	C_xanthogramma	juv		1.5		Nematocera	Nematocera	Nematocera			neutral
589	2017.07.21.	2017	7	Summer	Szabolcs-Szatmár-Bereg	SSB_Orchard_1_Újfehértó	Philodromidae	Philodromus cespitum	Ph_cespitum	adult	Female	2.2	0.272727	Neuroptera	Other prey	Chrysopidae		0.6	natural_enemy	larva
590	2017.07.17.	2017	7	Summer	Szabolcs-Szatmár-Bereg	SSB_Orchard_1_Újfehértó	Philodromidae	Philodromus cespitum	Ph_cespitum	adult	Female	1.9	0.842105	Nematocera	Nematocera	Nematocera		1.6	neutral
591	2017.07.17.	2017	7	Summer	Szabolcs-Szatmár-Bereg	SSB_Orchard_1_Újfehértó	Philodromidae	Philodromus cespitum	Ph_cespitum	adult	Female	2	1.45	Heteroptera	Heteroptera	Miridae	Deraeocoris ruber	2.9	natural_enemy
592	2017.07.20.	2017	7	Summer	Szabolcs-Szatmár-Bereg	SSB_Orchard_1_Újfehértó	Thomisidae	Ebrechtella tricuspidata	E_tricuspidata	juv		1.1	0.545455	Other Hymenoptera	Other Hymenoptera			0.6	natural_enemy	Hymenoptera parasitica
593	2017.07.19.	2017	7	Summer	Szabolcs-Szatmár-Bereg	SSB_Orchard_1_Újfehértó	Thomisidae	Ebrechtella tricuspidata	E_tricuspidata	adult	Female	2.1	0.285714	Sternorrhyncha	Sternorrhyncha	Aphididae	Aphis sp.	0.6	pest	imago, winged
594	2017.07.20.	2017	7	Summer	Szabolcs-Szatmár-Bereg	SSB_Orchard_1_Újfehértó	Thomisidae	Tmarus piger		juv		0.7	0.857143	Formicidae	Formicidae	Formicidae		0.6	neutral	worker
595	2017.07.20.	2017	7	Summer	Szabolcs-Szatmár-Bereg	SSB_Orchard_1_Újfehértó	Thomisidae	Xysticus kochi	Xysticus	juv		1.1	2.63636	Brachycera	Brachycera	Brachycera		2.9	neutral
596	2017.07.20.	2017	7	Summer	Szabolcs-Szatmár-Bereg	SSB_Orchard_1_Újfehértó	Thomisidae	Xysticus kochi	Xysticus	juv		1.5	0.866667	Heteroptera	Heteroptera	Lygaeidae	Nysius sp.	1.3	neutral
597	2017.07.21.	2017	7	Summer	Szabolcs-Szatmár-Bereg	SSB_Orchard_1_Újfehértó	Thomisidae	Xysticus sp.	Xysticus	juv		1.1	0.818182	Formicidae	Formicidae	Formicidae		0.9	neutral	worker
598	2017.07.20.	2017	7	Summer	Szabolcs-Szatmár-Bereg	SSB_Orchard_1_Újfehértó	Clubionidae	Clubiona sp.	Clubiona	juv		0.6	0.833333	Nematocera	Nematocera	Nematocera		0.5	neutral
599	2017.07.20.	2017	7	Summer	Szabolcs-Szatmár-Bereg	SSB_Orchard_1_Újfehértó	Clubionidae	Clubiona sp.	Clubiona	juv		1.1	1.27273	Auchenorrhyncha	Auchenorrhyncha	Flatidae	Metcalfa pruinosa	1.4	pest	larva
600	2017.07.19.	2017	7	Summer	Szabolcs-Szatmár-Bereg	SSB_Orchard_1_Újfehértó	Salticidae	Salticus scenicus	Other_salticids	adult	Female	1.9	1.10526	Brachycera	Brachycera	Brachycera		2.1	neutral
601	2017.07.18.	2017	7	Summer	Szabolcs-Szatmár-Bereg	SSB_Orchard_1_Újfehértó	Salticidae	Salticus scenicus	Other_salticids	juv		0.9	1	Brachycera	Brachycera	Brachycera		0.9	neutral
602	2017.07.21.	2017	7	Summer	Szabolcs-Szatmár-Bereg	SSB_Orchard_1_Újfehértó	Salticidae	Carrhotus xanthogramma	C_xanthogramma	juv		1.4	0.357143	Thysanoptera	Other prey			0.5	neutral
603	2017.07.21.	2017	7	Summer	Szabolcs-Szatmár-Bereg	SSB_Orchard_1_Újfehértó	Salticidae	Carrhotus xanthogramma	C_xanthogramma	juv		1.4	0.428571	Sternorrhyncha	Sternorrhyncha	Aphididae	Aphis sp.	0.6	pest	imago, winged
604	2017.07.21.	2017	7	Summer	Szabolcs-Szatmár-Bereg	SSB_Orchard_1_Újfehértó	Salticidae	Carrhotus xanthogramma	C_xanthogramma	juv		1.5	0.533333	Araneae	Araneae	Linyphiidae	Gongylidiellum murcidum	0.8	natural_enemy	adult male
605	2017.07.21.	2017	7	Summer	Szabolcs-Szatmár-Bereg	SSB_Orchard_1_Újfehértó	Salticidae	Carrhotus xanthogramma	C_xanthogramma	juv		1.8	1.33333	Brachycera	Brachycera	Brachycera		2.4	neutral
606	2017.07.21.	2017	7	Summer	Szabolcs-Szatmár-Bereg	SSB_Orchard_1_Újfehértó	Salticidae	Carrhotus xanthogramma	C_xanthogramma	adult	Female	2.7	1.22222	Brachycera	Brachycera	Brachycera		3.3	neutral
607	2017.07.21.	2017	7	Summer	Szabolcs-Szatmár-Bereg	SSB_Orchard_1_Újfehértó	Salticidae	Carrhotus xanthogramma	C_xanthogramma	juv		1.9	1	Lepidoptera	Lepidoptera	Sesiidae	Synanthedon myopaeformis	1.9	pest	imago
608	2017.07.21.	2017	7	Summer	Szabolcs-Szatmár-Bereg	SSB_Orchard_1_Újfehértó	Salticidae	Carrhotus xanthogramma	C_xanthogramma	juv		1.6	0.375	Psocoptera	Other prey			0.6	neutral	imago, winged
609	2017.07.20.	2017	7	Summer	Szabolcs-Szatmár-Bereg	SSB_Orchard_1_Újfehértó	Salticidae	Carrhotus xanthogramma	C_xanthogramma	juv		1.8	0.555556	Brachycera	Brachycera	Brachycera		1	neutral
610	2017.07.20.	2017	7	Summer	Szabolcs-Szatmár-Bereg	SSB_Orchard_1_Újfehértó	Salticidae	Carrhotus xanthogramma	C_xanthogramma	juv		1.6	0.6875	Auchenorrhyncha	Auchenorrhyncha			1.1	neutral	imago
611	2017.07.21.	2017	7	Summer	Szabolcs-Szatmár-Bereg	SSB_Orchard_1_Újfehértó	Salticidae	Carrhotus xanthogramma	C_xanthogramma	juv		1.3	0.461538	Sternorrhyncha	Sternorrhyncha	Aphididae	Aphis sp.	0.6	pest	imago, winged
612	2017.07.21.	2017	7	Summer	Szabolcs-Szatmár-Bereg	SSB_Orchard_1_Újfehértó	Salticidae	Carrhotus xanthogramma	C_xanthogramma	juv		1.6	0.375	Sternorrhyncha	Sternorrhyncha	Aphididae	Aphis sp.	0.6	pest
613	2017.07.17.	2017	7	Summer	Szabolcs-Szatmár-Bereg	SSB_Orchard_1_Újfehértó	Salticidae	Carrhotus xanthogramma	C_xanthogramma	juv		1.6	0.5625	Nematocera	Nematocera	Nematocera		0.9	neutral
614	2017.07.21.	2017	7	Summer	Szabolcs-Szatmár-Bereg	SSB_Orchard_1_Újfehértó	Salticidae	Carrhotus xanthogramma	C_xanthogramma	juv		1.8	0.444444	Sternorrhyncha	Sternorrhyncha	Aphididae		0.8	pest	imago, winged
615	2017.07.21.	2017	7	Summer	Szabolcs-Szatmár-Bereg	SSB_Orchard_1_Újfehértó	Salticidae	Carrhotus xanthogramma	C_xanthogramma	juv		1.5	0.333333	Sternorrhyncha	Sternorrhyncha	Aphididae	Aphis sp.	0.5	pest
616	2017.07.21.	2017	7	Summer	Szabolcs-Szatmár-Bereg	SSB_Orchard_1_Újfehértó	Salticidae	Carrhotus xanthogramma	C_xanthogramma	juv		1.1		Thysanoptera	Other prey				neutral
617	2017.07.21.	2017	7	Summer	Szabolcs-Szatmár-Bereg	SSB_Orchard_1_Újfehértó	Salticidae	Carrhotus xanthogramma	C_xanthogramma	juv		1.8	0.277778	Araneae	Araneae			0.5	natural_enemy
618	2017.07.17.	2017	7	Summer	Szabolcs-Szatmár-Bereg	SSB_Orchard_1_Újfehértó	Salticidae	Carrhotus xanthogramma	C_xanthogramma	juv		1.4	0.428571	Sternorrhyncha	Sternorrhyncha	Aphididae	Aphis sp.	0.6	pest
619	2017.07.17.	2017	7	Summer	Szabolcs-Szatmár-Bereg	SSB_Orchard_1_Újfehértó	Salticidae	Carrhotus xanthogramma	C_xanthogramma	juv		1.5	1	Nematocera	Nematocera	Nematocera		1.5	neutral
620	2017.07.20.	2017	7	Summer	Szabolcs-Szatmár-Bereg	SSB_Orchard_1_Újfehértó	Salticidae	Carrhotus xanthogramma	C_xanthogramma	juv		1.5	0.333333	Other Hymenoptera	Other Hymenoptera			0.5	natural_enemy	Hymenoptera parasitica
621	2017.07.20.	2017	7	Summer	Szabolcs-Szatmár-Bereg	SSB_Orchard_1_Újfehértó	Salticidae	Carrhotus xanthogramma	C_xanthogramma	juv		1.2	0.833333	Formicidae	Formicidae	Formicidae	Lasius niger	1	neutral	winged male
622	2017.07.21.	2017	7	Summer	Szabolcs-Szatmár-Bereg	SSB_Orchard_1_Újfehértó	Salticidae	Carrhotus xanthogramma	C_xanthogramma	juv		1.7	0.235294	Sternorrhyncha	Sternorrhyncha	Aphididae		0.4	pest	imago, winged
623	2017.07.17.	2017	7	Summer	Szabolcs-Szatmár-Bereg	SSB_Orchard_1_Újfehértó	Salticidae	Carrhotus xanthogramma	C_xanthogramma	juv		1.5	0.866667	Araneae	Araneae	Salticidae	Carrhotus xanthogramma	1.3	natural_enemy
624	2017.07.18.	2017	7	Summer	Szabolcs-Szatmár-Bereg	SSB_Orchard_1_Újfehértó	Salticidae	Carrhotus xanthogramma	C_xanthogramma	juv		1.6	0.4375	Sternorrhyncha	Sternorrhyncha	Aphididae	Aphis sp.	0.7	pest
625	2017.07.19.	2017	7	Summer	Szabolcs-Szatmár-Bereg	SSB_Orchard_1_Újfehértó	Salticidae	Carrhotus xanthogramma	C_xanthogramma	juv		1.6	0.375	Araneae	Araneae	Philodromidae		0.6	natural_enemy
626	2017.07.17.	2017	7	Summer	Szabolcs-Szatmár-Bereg	SSB_Orchard_1_Újfehértó	Salticidae	Carrhotus xanthogramma	C_xanthogramma	juv		1.5	0.4	Sternorrhyncha	Sternorrhyncha	Aphididae	Aphis sp.	0.6	pest	imago, winged
627	2017.07.18.	2017	7	Summer	Szabolcs-Szatmár-Bereg	SSB_Orchard_1_Újfehértó	Salticidae	Carrhotus xanthogramma	C_xanthogramma	juv		1.5	0.733333	Auchenorrhyncha	Auchenorrhyncha			1.1	neutral	imago
628	2017.07.19.	2017	7	Summer	Szabolcs-Szatmár-Bereg	SSB_Orchard_1_Újfehértó	Salticidae	Carrhotus xanthogramma	C_xanthogramma	juv		1.5	0.733333	Nematocera	Nematocera	Nematocera		1.1	neutral
629	2017.07.19.	2017	7	Summer	Szabolcs-Szatmár-Bereg	SSB_Orchard_1_Újfehértó	Salticidae	Carrhotus xanthogramma	C_xanthogramma	juv		1.5	1.13333	Brachycera	Brachycera	Brachycera		1.7	neutral
630	2017.07.18.	2017	7	Summer	Szabolcs-Szatmár-Bereg	SSB_Orchard_1_Újfehértó	Salticidae	Carrhotus xanthogramma	C_xanthogramma	juv		1.4		Nematocera	Nematocera	Nematocera			neutral
631	2017.07.18.	2017	7	Summer	Szabolcs-Szatmár-Bereg	SSB_Orchard_1_Újfehértó	Salticidae	Carrhotus xanthogramma	C_xanthogramma	juv		1.5	1.33333	Brachycera	Brachycera	Brachycera		2	neutral
632	2017.07.18.	2017	7	Summer	Szabolcs-Szatmár-Bereg	SSB_Orchard_1_Újfehértó	Salticidae	Carrhotus xanthogramma	C_xanthogramma	juv		1.5	0.8	Brachycera	Brachycera	Brachycera		1.2	neutral
633	2017.07.19.	2017	7	Summer	Szabolcs-Szatmár-Bereg	SSB_Orchard_1_Újfehértó	Salticidae	Carrhotus xanthogramma	C_xanthogramma	juv		1.6	0.4375	Nematocera	Nematocera	Nematocera		0.7	neutral
634	2017.07.19.	2017	7	Summer	Szabolcs-Szatmár-Bereg	SSB_Orchard_1_Újfehértó	Salticidae	Carrhotus xanthogramma	C_xanthogramma	juv		1.6	1.125	Brachycera	Brachycera	Brachycera		1.8	neutral
635	2017.07.18.	2017	7	Summer	Szabolcs-Szatmár-Bereg	SSB_Orchard_1_Újfehértó	Salticidae	Carrhotus xanthogramma	C_xanthogramma	juv		1.6	0.5	Sternorrhyncha	Sternorrhyncha	Aphididae	Aphis sp.	0.8	pest
636	2017.07.17.	2017	7	Summer	Szabolcs-Szatmár-Bereg	SSB_Orchard_1_Újfehértó	Salticidae	Carrhotus xanthogramma	C_xanthogramma	juv		1.5	0.466667	Sternorrhyncha	Sternorrhyncha	Aphididae	Aphis sp.	0.7	pest	imago, winged
637	2017.07.18.	2017	7	Summer	Szabolcs-Szatmár-Bereg	SSB_Orchard_1_Újfehértó	Salticidae	Carrhotus xanthogramma	C_xanthogramma	juv		1.1	0.636364	Sternorrhyncha	Sternorrhyncha	Aphididae	Aphis sp.	0.7	pest	imago, winged
638	2017.07.18.	2017	7	Summer	Szabolcs-Szatmár-Bereg	SSB_Orchard_1_Újfehértó	Salticidae	Carrhotus xanthogramma	C_xanthogramma	juv		1.6	0.375	Brachycera	Brachycera	Brachycera		0.6	neutral
639	2017.07.18.	2017	7	Summer	Szabolcs-Szatmár-Bereg	SSB_Orchard_1_Újfehértó	Salticidae	Carrhotus xanthogramma	C_xanthogramma	juv		1.6		Brachycera	Brachycera	Brachycera			neutral
640	2017.07.17.	2017	7	Summer	Szabolcs-Szatmár-Bereg	SSB_Orchard_1_Újfehértó	Salticidae	Carrhotus xanthogramma	C_xanthogramma	juv		1.5	1	Nematocera	Nematocera	Nematocera		1.5	neutral
641	2017.07.19.	2017	7	Summer	Szabolcs-Szatmár-Bereg	SSB_Orchard_1_Újfehértó	Salticidae	Carrhotus xanthogramma	C_xanthogramma	juv		1.1	0.636364	Sternorrhyncha	Sternorrhyncha	Aphididae	Aphis sp.	0.7	pest	imago, winged
642	2017.07.18.	2017	7	Summer	Szabolcs-Szatmár-Bereg	SSB_Orchard_1_Újfehértó	Salticidae	Carrhotus xanthogramma	C_xanthogramma	juv		1.6	0.25	Sternorrhyncha	Sternorrhyncha	Aphididae	Aphis sp.	0.4	pest
643	2017.07.19.	2017	7	Summer	Szabolcs-Szatmár-Bereg	SSB_Orchard_1_Újfehértó	Salticidae	Carrhotus xanthogramma	C_xanthogramma	juv		1.6	0.3125	Sternorrhyncha	Sternorrhyncha	Aphididae		0.5	pest
644	2017.07.28.	2017	7	Summer	Bács-Kiskun	BK_Orchard_1	Philodromidae	Philodromus longipalpis		adult	Female	2.3	0.478261	Heteroptera	Heteroptera	Miridae	Pilophorus sp.	1.1	natural_enemy
645	2017.08.24.	2017	8	Summer	Szabolcs-Szatmár-Bereg	SSB_Orchard_1_Újfehértó	Thomisidae	Xysticus (Spiracme) striatipes	Xysticus	subadult	Female	2.6	1.42308	Heteroptera	Heteroptera	Pentatomidae	Eysarcoris ventralis	3.7	neutral
646	2017.08.24.	2017	8	Summer	Szabolcs-Szatmár-Bereg	SSB_Orchard_1_Újfehértó	Clubionidae	Clubiona sp.	Clubiona	juv		1.4	0.571429	Heteroptera	Heteroptera	Miridae		0.8	natural_enemy
647	2017.08.24.	2017	8	Summer	Szabolcs-Szatmár-Bereg	SSB_Orchard_1_Újfehértó	Clubionidae	Clubiona sp.	Clubiona	juv		1.6	1	Brachycera	Brachycera	Brachycera		1.6	neutral
648	2017.08.24.	2017	8	Summer	Szabolcs-Szatmár-Bereg	SSB_Orchard_1_Újfehértó	Clubionidae	Clubiona sp.	Clubiona	juv		1	1	Brachycera	Brachycera	Brachycera		1	neutral
649	2017.08.24.	2017	8	Summer	Szabolcs-Szatmár-Bereg	SSB_Orchard_1_Újfehértó	Clubionidae	Clubiona sp.	Clubiona	juv		1.5	0.6	Brachycera	Brachycera	Brachycera		0.9	neutral
650	2017.08.24.	2017	8	Summer	Szabolcs-Szatmár-Bereg	SSB_Orchard_1_Újfehértó	Clubionidae	Clubiona sp.	Clubiona	juv		1.4	0.642857	Lepidoptera	Lepidoptera	cf. leaf miner		0.9	pest	imago
651	2017.08.25.	2017	8	Summer	Szabolcs-Szatmár-Bereg	SSB_Orchard_1_Újfehértó	Salticidae	Salticus scenicus	Other_salticids	subadult	Female	1.7	0.529412	Coleoptera	Coleoptera	Curculionidae	Rhamphus sp.	0.9	pest
652	2017.08.24.	2017	8	Summer	Szabolcs-Szatmár-Bereg	SSB_Orchard_1_Újfehértó	Salticidae	Carrhotus xanthogramma	C_xanthogramma	subadult	Male	2.1	1.33333	Brachycera	Brachycera	Brachycera		2.8	neutral
653	2017.08.24.	2017	8	Summer	Szabolcs-Szatmár-Bereg	SSB_Orchard_1_Újfehértó	Salticidae	Carrhotus xanthogramma	C_xanthogramma	juv		2	1.1	Brachycera	Brachycera	Brachycera		2.2	neutral
654	2017.08.24.	2017	8	Summer	Szabolcs-Szatmár-Bereg	SSB_Orchard_1_Újfehértó	Salticidae	Carrhotus xanthogramma	C_xanthogramma	subadult	Male	2.2	1.45455	Brachycera	Brachycera	Brachycera		3.2	neutral
655	2017.08.25.	2017	8	Summer	Szabolcs-Szatmár-Bereg	SSB_Orchard_1_Újfehértó	Salticidae	Carrhotus xanthogramma	C_xanthogramma	juv		2	0.45	Other Hymenoptera	Other Hymenoptera			0.9	natural_enemy	Hymenoptera parasitica
656	2017.08.25.	2017	8	Summer	Szabolcs-Szatmár-Bereg	SSB_Orchard_1_Újfehértó	Salticidae	Carrhotus xanthogramma	C_xanthogramma	juv		2	1.15	Brachycera	Brachycera	Brachycera		2.3	neutral
657	2017.08.25.	2017	8	Summer	Szabolcs-Szatmár-Bereg	SSB_Orchard_1_Újfehértó	Salticidae	Carrhotus xanthogramma	C_xanthogramma	juv		2.1	0.428571	Nematocera	Nematocera	Nematocera		0.9	neutral
658	2017.08.25.	2017	8	Summer	Szabolcs-Szatmár-Bereg	SSB_Orchard_1_Újfehértó	Salticidae	Carrhotus xanthogramma	C_xanthogramma	subadult	Male	2.2	1	Brachycera	Brachycera	Brachycera		2.2	neutral
659	2017.08.25.	2017	8	Summer	Szabolcs-Szatmár-Bereg	SSB_Orchard_1_Újfehértó	Salticidae	Carrhotus xanthogramma	C_xanthogramma	juv		2	0.9	Brachycera	Brachycera	Brachycera		1.8	neutral
660	2017.08.25.	2017	8	Summer	Szabolcs-Szatmár-Bereg	SSB_Orchard_1_Újfehértó	Salticidae	Carrhotus xanthogramma	C_xanthogramma	juv		2	0.9	Nematocera	Nematocera	Nematocera		1.8	neutral
661	2017.08.24.	2017	8	Summer	Szabolcs-Szatmár-Bereg	SSB_Orchard_1_Újfehértó	Salticidae	Carrhotus xanthogramma	C_xanthogramma	subadult	Male	2.2	0.909091	Araneae	Araneae	Philodromidae	Philodromus cespitum	2	natural_enemy	adult female
662	2017.08.24.	2017	8	Summer	Szabolcs-Szatmár-Bereg	SSB_Orchard_1_Újfehértó	Salticidae	Carrhotus xanthogramma	C_xanthogramma	juv		2.1	1.19048	Brachycera	Brachycera	Brachycera		2.5	neutral
663	2017.08.25.	2017	8	Summer	Szabolcs-Szatmár-Bereg	SSB_Orchard_1_Újfehértó	Salticidae	Carrhotus xanthogramma	C_xanthogramma	juv		1.8	0.888889	Brachycera	Brachycera	Syrphidae	Syrphidae sp.	1.6	natural_enemy	imago
664	2017.08.24.	2017	8	Summer	Szabolcs-Szatmár-Bereg	SSB_Orchard_1_Újfehértó	Salticidae	Carrhotus xanthogramma	C_xanthogramma	juv		2.2	0.909091	Araneae	Araneae	Philodromidae	Philodromus cespitum	2	natural_enemy	adult female
665	2017.08.24.	2017	8	Summer	Szabolcs-Szatmár-Bereg	SSB_Orchard_1_Újfehértó	Salticidae	Carrhotus xanthogramma	C_xanthogramma	juv		2.1	0.571429	Araneae	Araneae	Salticidae	Salticus sp.	1.2	natural_enemy
666	2017.08.24.	2017	8	Summer	Szabolcs-Szatmár-Bereg	SSB_Orchard_1_Újfehértó	Salticidae	Carrhotus xanthogramma	C_xanthogramma	juv		1.2	0.416667	Sternorrhyncha	Sternorrhyncha	Aphididae	Aphis sp.	0.5	pest
667	2017.08.25.	2017	8	Summer	Szabolcs-Szatmár-Bereg	SSB_Orchard_1_Újfehértó	Salticidae	Carrhotus xanthogramma	C_xanthogramma	juv		2.1	0.666667	Araneae	Araneae	Araneidae	Cyclosa oculata	1.4	natural_enemy	adult male
668	2017.08.25.	2017	8	Summer	Szabolcs-Szatmár-Bereg	SSB_Orchard_1_Újfehértó	Salticidae	Carrhotus xanthogramma	C_xanthogramma	subadult	Male	2.2	0.818182	Lepidoptera	Lepidoptera	cf. Tortricidae		1.8	pest	larva
669	2017.09.15.	2017	9	Fall	Bács-Kiskun	BK_Orchard_2	Salticidae	Carrhotus xanthogramma	C_xanthogramma	juv		1.4		Araneae	Araneae				natural_enemy
670	2017.09.12.	2017	9	Fall	Bács-Kiskun	BK_Orchard_1	Thomisidae	Ebrechtella tricuspidata	E_tricuspidata	subadult	Female	1.9	0.315789	Sternorrhyncha	Sternorrhyncha	Aphididae	Aphis nerii	0.6	pest
671	2017.09.11.	2017	9	Fall	Pest	P_Orchard_3	Thomisidae	Ebrechtella tricuspidata	E_tricuspidata	adult	Male	1.6	0.6875	Formicidae	Formicidae	Formicidae		1.1	neutral	winged male
672	2017.09.15.	2017	9	Fall	Bács-Kiskun	BK_Orchard_2	Thomisidae	Ebrechtella tricuspidata	E_tricuspidata	subadult	Female	2	0.3	Lepidoptera	Lepidoptera	cf. Tortricidae		0.6	pest	larva
673	2017.09.11.	2017	9	Fall	Pest	P_Orchard_3	Thomisidae	Xysticus acerbus	Xysticus	subadult	Female	2.3	0.478261	Formicidae	Formicidae	Formicidae		1.1	neutral	worker
674	2017.09.13.	2017	9	Fall	Szabolcs-Szatmár-Bereg	SSB_Orchard_1_Újfehértó	Philodromidae	Philodromus cf. cespitum	Ph_cespitum	subadult	Female	1.9	0.315789	Other Hymenoptera	Other Hymenoptera			0.6	natural_enemy	Hymenoptera parasitica
675	2017.09.11.	2017	9	Fall	Pest	P_Orchard_3	Oxyopidae	Oxyopes ramosus		subadult	Female	1.9	0.578947	Formicidae	Formicidae	Formicidae		1.1	neutral	winged male
676	2017.09.15.	2017	9	Fall	Bács-Kiskun	BK_Orchard_2	Oxyopidae	Oxyopes ramosus		juv		1.6	0.625	Formicidae	Formicidae	Formicidae		1	neutral	winged male
677	2017.09.15.	2017	9	Fall	Bács-Kiskun	BK_Orchard_2	Oxyopidae	Oxyopes ramosus		juv		1.2	0.666667	Auchenorrhyncha	Auchenorrhyncha			0.8	neutral
678	2017.09.11.	2017	9	Fall	Pest	P_Orchard_3	Oxyopidae	Oxyopes sp.		juv		2	0.55	Formicidae	Formicidae	Formicidae		1.1	neutral	winged male
679	2017.09.15.	2017	9	Fall	Bács-Kiskun	BK_Orchard_2	Oxyopidae	Oxyopes ramosus		juv		1.6	0.4375	Formicidae	Formicidae	Formicidae		0.7	neutral	worker
680	2017.09.15.	2017	9	Fall	Bács-Kiskun	BK_Orchard_2	Oxyopidae	Oxyopes ramosus		juv		1.3	0.846154	Coleoptera	Coleoptera	Staphylinidae		1.1	natural_enemy
681	2017.09.11.	2017	9	Fall	Pest	P_Orchard_3	Salticidae	Pseudicius encarpatus	Other_salticids	juv		1.2	0.583333	Auchenorrhyncha	Auchenorrhyncha			0.7	neutral
682	2017.09.14.	2017	9	Fall	Szabolcs-Szatmár-Bereg	SSB_Orchard_1_Újfehértó	Salticidae	Heliophanus cupreus	Other_salticids	juv		1	0.6	Nematocera	Nematocera	Nematocera		0.6	neutral
683	2017.09.13.	2017	9	Fall	Szabolcs-Szatmár-Bereg	SSB_Orchard_1_Újfehértó	Salticidae	Carrhotus xanthogramma	C_xanthogramma	juv		1.6	0.5625	Heteroptera	Heteroptera	Miridae		0.9	natural_enemy
684	2017.09.14.	2017	9	Fall	Szabolcs-Szatmár-Bereg	SSB_Orchard_3	Salticidae	Carrhotus xanthogramma	C_xanthogramma	subadult	Female	2.4	0.208333	Araneae	Araneae	Theridiidae	Theridion sp.	0.5	natural_enemy	juvenile
685	2017.09.14.	2017	9	Fall	Szabolcs-Szatmár-Bereg	SSB_Orchard_1_Újfehértó	Salticidae	Carrhotus xanthogramma	C_xanthogramma	subadult	Female	2.3		Heteroptera	Heteroptera	Miridae			natural_enemy
686	2017.09.14.	2017	9	Fall	Szabolcs-Szatmár-Bereg	SSB_Orchard_3	Salticidae	Carrhotus xanthogramma	C_xanthogramma	subadult	Male	2.5	0.28	Psocoptera	Other prey			0.7	neutral	imago, winged
687	2017.09.14.	2017	9	Fall	Szabolcs-Szatmár-Bereg	SSB_Orchard_1_Újfehértó	Salticidae	Carrhotus xanthogramma	C_xanthogramma	subadult	Male	2.4	0.333333	Heteroptera	Heteroptera	Tingidae	Stephanitis pyri	0.8	pest
688	2017.09.14.	2017	9	Fall	Szabolcs-Szatmár-Bereg	SSB_Orchard_1_Újfehértó	Salticidae	Carrhotus xanthogramma	C_xanthogramma	subadult	Male	2.4	0.916667	Brachycera	Brachycera	Brachycera		2.2	neutral
689	2017.09.14.	2017	9	Fall	Szabolcs-Szatmár-Bereg	SSB_Orchard_1_Újfehértó	Salticidae	Carrhotus xanthogramma	C_xanthogramma	subadult	Male	2.5	0.88	Brachycera	Brachycera	Syrphidae	Episyrphus balteatus	2.2	natural_enemy	imago
690	2017.09.14.	2017	9	Fall	Szabolcs-Szatmár-Bereg	SSB_Orchard_3	Salticidae	Carrhotus xanthogramma	C_xanthogramma	juv		2.2	0.272727	Auchenorrhyncha	Auchenorrhyncha			0.6	neutral	imago
691	2017.09.14.	2017	9	Fall	Szabolcs-Szatmár-Bereg	SSB_Orchard_1_Újfehértó	Salticidae	Carrhotus xanthogramma	C_xanthogramma	subadult	Male	2.4		Other Hymenoptera	Other Hymenoptera				natural_enemy	Hymenoptera parasitica
692	2017.09.14.	2017	9	Fall	Szabolcs-Szatmár-Bereg	SSB_Orchard_3	Salticidae	Carrhotus xanthogramma	C_xanthogramma	subadult	Female	2.4		Araneae	Araneae				natural_enemy
693	2017.09.14.	2017	9	Fall	Szabolcs-Szatmár-Bereg	SSB_Orchard_1_Újfehértó	Salticidae	Carrhotus xanthogramma	C_xanthogramma	subadult	Female	2.4	0.458333	Auchenorrhyncha	Auchenorrhyncha	Cicadellidae	Neoaliturus fenestratus	1.1	neutral	imago
694	2017.09.13.	2017	9	Fall	Szabolcs-Szatmár-Bereg	SSB_Orchard_1_Újfehértó	Salticidae	Carrhotus xanthogramma	C_xanthogramma	subadult	Male	2.5	0.76	Brachycera	Brachycera	Syrphidae	Syrphidae sp.	1.9	natural_enemy	imago
695	2017.09.14.	2017	9	Fall	Szabolcs-Szatmár-Bereg	SSB_Orchard_1_Újfehértó	Salticidae	Carrhotus xanthogramma	C_xanthogramma	subadult	Male	2.6	0.346154	Other Hymenoptera	Other Hymenoptera			0.9	natural_enemy	Hymenoptera parasitica
696	2017.09.13.	2017	9	Fall	Szabolcs-Szatmár-Bereg	SSB_Orchard_1_Újfehértó	Salticidae	Carrhotus xanthogramma	C_xanthogramma	subadult	Female	2.3	0.695652	Brachycera	Brachycera	Brachycera		1.6	neutral
697	2017.09.14.	2017	9	Fall	Szabolcs-Szatmár-Bereg	SSB_Orchard_1_Újfehértó	Salticidae	Carrhotus xanthogramma	C_xanthogramma	subadult	Female	2.3	0.347826	Sternorrhyncha	Sternorrhyncha	Aphididae		0.8	pest	imago, winged
698	2017.09.27.	2017	9	Fall	Szabolcs-Szatmár-Bereg	SSB_Orchard_1_Újfehértó	Clubionidae	Clubiona sp.	Clubiona	subadult	Male	1.7	0.588235	Formicidae	Formicidae	Formicidae		1	neutral	winged male
699	2017.09.26.	2017	9	Fall	Szabolcs-Szatmár-Bereg	SSB_Orchard_1_Újfehértó	Clubionidae	Clubiona sp.	Clubiona	juv		0.8	1.25	Formicidae	Formicidae	Formicidae		1	neutral	winged male
700	2017.09.28.	2017	9	Fall	Szabolcs-Szatmár-Bereg	SSB_Orchard_1_Újfehértó	Clubionidae	Clubiona sp.	Clubiona	juv		0.8	0.875	Nematocera	Nematocera	Nematocera		0.7	neutral
701	2017.09.27.	2017	9	Fall	Szabolcs-Szatmár-Bereg	SSB_Orchard_1_Újfehértó	Salticidae	Carrhotus xanthogramma	C_xanthogramma	subadult	Female	2.3	0.826087	Brachycera	Brachycera	Brachycera		1.9	neutral
702	2017.09.27.	2017	9	Fall	Szabolcs-Szatmár-Bereg	SSB_Orchard_1_Újfehértó	Salticidae	Carrhotus xanthogramma	C_xanthogramma	subadult	Female	2.3	0.347826	Auchenorrhyncha	Auchenorrhyncha			0.8	neutral	imago
703	2017.10.12.	2017	10	Fall	Szabolcs-Szatmár-Bereg	SSB_Orchard_1_Újfehértó	Philodromidae	Philodromus rufus		juv		1.2	0.583333	Sternorrhyncha	Sternorrhyncha	Aphididae		0.7	pest	imago, winged
704	2017.10.12.	2017	10	Fall	Szabolcs-Szatmár-Bereg	SSB_Orchard_1_Újfehértó	Oxyopidae	Oxyopes ramosus		juv		1.5	0.466667	Sternorrhyncha	Sternorrhyncha	Aphididae		0.7	pest	imago, winged
705	2017.10.02.	2017	10	Fall	Szabolcs-Szatmár-Bereg	SSB_Orchard_1_Újfehértó	Clubionidae	Clubiona frutetorum	Clubiona	adult	Female	1.9	0.473684	Brachycera	Brachycera	Brachycera		0.9	neutral
706	2017.10.02.	2017	10	Fall	Szabolcs-Szatmár-Bereg	SSB_Orchard_1_Újfehértó	Clubionidae	Clubiona sp.	Clubiona	subadult	Female	1.5	0.533333	Nematocera	Nematocera	Nematocera		0.8	neutral
707	2017.10.04.	2017	10	Fall	Szabolcs-Szatmár-Bereg	SSB_Orchard_1_Újfehértó	Clubionidae	Clubiona sp.	Clubiona	juv		1.3	0.538462	Sternorrhyncha	Sternorrhyncha	Aphididae		0.7	pest	imago, winged
708	2017.10.04.	2017	10	Fall	Szabolcs-Szatmár-Bereg	SSB_Orchard_1_Újfehértó	Clubionidae	Clubiona sp.	Clubiona	subadult	Female	1.7	0.705882	Nematocera	Nematocera	Nematocera		1.2	neutral
709	2017.10.12.	2017	10	Fall	Szabolcs-Szatmár-Bereg	SSB_Orchard_1_Újfehértó	Clubionidae	Clubiona sp.	Clubiona	juv		1.6	0.625	Auchenorrhyncha	Auchenorrhyncha	Cicadellidae	Empoasca sp.	1	pest	imago
710	2017.10.12.	2017	10	Fall	Szabolcs-Szatmár-Bereg	SSB_Orchard_1_Újfehértó	Clubionidae	Clubiona sp.	Clubiona	subadult	Male	1.6	0.5	Sternorrhyncha	Sternorrhyncha	Aphididae		0.8	pest	imago, winged
711	2017.10.12.	2017	10	Fall	Szabolcs-Szatmár-Bereg	SSB_Orchard_1_Újfehértó	Clubionidae	Clubiona sp.	Clubiona	juv		1.5		Sternorrhyncha	Sternorrhyncha	Aphididae			pest	imago, winged
712	2017.10.12.	2017	10	Fall	Szabolcs-Szatmár-Bereg	SSB_Orchard_1_Újfehértó	Clubionidae	Clubiona sp.	Clubiona	subadult	Female	1.9	0.368421	Sternorrhyncha	Sternorrhyncha	Aphididae		0.7	pest	imago, winged
713	2017.10.12.	2017	10	Fall	Szabolcs-Szatmár-Bereg	SSB_Orchard_1_Újfehértó	Clubionidae	Clubiona sp.	Clubiona	juv		1.1	0.545455	Nematocera	Nematocera	Nematocera		0.6	neutral
714	2017.10.12.	2017	10	Fall	Szabolcs-Szatmár-Bereg	SSB_Orchard_1_Újfehértó	Clubionidae	Clubiona frutetorum	Clubiona	adult	Male	2	0.4	Sternorrhyncha	Sternorrhyncha	Aphididae		0.8	pest	imago, winged
715	2017.10.12.	2017	10	Fall	Szabolcs-Szatmár-Bereg	SSB_Orchard_1_Újfehértó	Salticidae	Heliophanus cupreus	Other_salticids	juv		1.1	0.818182	Sternorrhyncha	Sternorrhyncha	Aphididae		0.9	pest	imago, winged
716	2017.10.12.	2017	10	Fall	Szabolcs-Szatmár-Bereg	SSB_Orchard_1_Újfehértó	Salticidae	Salticus scenicus	Other_salticids	juv		1.1	0.454545	Nematocera	Nematocera	Nematocera		0.5	neutral
717	2017.10.13.	2017	10	Fall	Szabolcs-Szatmár-Bereg	SSB_Orchard_1_Újfehértó	Salticidae	Salticus scenicus	Other_salticids	juv		1.1	0.363636	Nematocera	Nematocera	Nematocera		0.4	neutral
718	2017.10.13.	2017	10	Fall	Szabolcs-Szatmár-Bereg	SSB_Orchard_1_Újfehértó	Salticidae	Salticus scenicus	Other_salticids					Sternorrhyncha	Sternorrhyncha	Aphididae		0.8	pest	imago, winged
719	2017.10.12.	2017	10	Fall	Szabolcs-Szatmár-Bereg	SSB_Orchard_1_Újfehértó	Salticidae	Carrhotus xanthogramma	C_xanthogramma	subadult	Female			Sternorrhyncha	Sternorrhyncha	Aphididae			pest	imago, winged
720	2017.10.13.	2017	10	Fall	Szabolcs-Szatmár-Bereg	SSB_Orchard_1_Újfehértó	Salticidae	Carrhotus xanthogramma	C_xanthogramma	subadult	Male	2.7	0.555556	Brachycera	Brachycera	Brachycera		1.5	neutral
721	2017.10.12.	2017	10	Fall	Szabolcs-Szatmár-Bereg	SSB_Orchard_1_Újfehértó	Salticidae	Carrhotus xanthogramma	C_xanthogramma	subadult	Female	2.3	0.304348	Sternorrhyncha	Sternorrhyncha	Aphididae		0.7	pest	imago, winged
722	2017.10.12.	2017	10	Fall	Szabolcs-Szatmár-Bereg	SSB_Orchard_1_Újfehértó	Salticidae	Carrhotus xanthogramma	C_xanthogramma	subadult	Female	2.4		Formicidae	Formicidae	Formicidae			neutral	queen
723	2017.10.12.	2017	10	Fall	Szabolcs-Szatmár-Bereg	SSB_Orchard_1_Újfehértó	Salticidae	Carrhotus xanthogramma	C_xanthogramma	subadult	Male	2.8	0.285714	Sternorrhyncha	Sternorrhyncha	Aphididae		0.8	pest	imago, winged
724	2017.10.13.	2017	10	Fall	Szabolcs-Szatmár-Bereg	SSB_Orchard_1_Újfehértó	Salticidae	Carrhotus xanthogramma	C_xanthogramma	subadult	Female	2.4	0.625	Heteroptera	Heteroptera	Rhopalidae		1.5	neutral
725	2017.10.12.	2017	10	Fall	Szabolcs-Szatmár-Bereg	SSB_Orchard_1_Újfehértó	Salticidae	Carrhotus xanthogramma	C_xanthogramma	subadult	Male	2.7	0.296296	Auchenorrhyncha	Auchenorrhyncha	Cicadellidae	Empoasca sp.	0.8	pest	imago
726	2017.10.13.	2017	10	Fall	Szabolcs-Szatmár-Bereg	SSB_Orchard_1_Újfehértó	Salticidae	Carrhotus xanthogramma	C_xanthogramma	subadult	Male	2.2		Araneae	Araneae				natural_enemy
727	2017.10.12.	2017	10	Fall	Szabolcs-Szatmár-Bereg	SSB_Orchard_1_Újfehértó	Salticidae	Carrhotus xanthogramma	C_xanthogramma					Formicidae	Formicidae	Formicidae		1.1	neutral	winged male
728	2017.10.12.	2017	10	Fall	Szabolcs-Szatmár-Bereg	SSB_Orchard_1_Újfehértó	Salticidae	Carrhotus xanthogramma	C_xanthogramma	subadult	Female	2.5	0.28	Sternorrhyncha	Sternorrhyncha	Aphididae		0.7	pest	imago, winged
729	2017.10.12.	2017	10	Fall	Szabolcs-Szatmár-Bereg	SSB_Orchard_1_Újfehértó	Salticidae	Carrhotus xanthogramma	C_xanthogramma	subadult	Male	2.7	0.777778	Heteroptera	Heteroptera	Miridae	Lygus sp.	2.1	neutral
730	2017.10.13.	2017	10	Fall	Szabolcs-Szatmár-Bereg	SSB_Orchard_1_Újfehértó	Salticidae	Carrhotus xanthogramma	C_xanthogramma	subadult	Male	2.5	0.32	Sternorrhyncha	Sternorrhyncha	Aphididae		0.8	pest	imago, winged
731	2017.10.12.	2017	10	Fall	Szabolcs-Szatmár-Bereg	SSB_Orchard_1_Újfehértó	Salticidae	Carrhotus xanthogramma	C_xanthogramma	subadult	Male	2.2	0.454545	Formicidae	Formicidae	Formicidae		1	neutral	winged male
732	2017.10.12.	2017	10	Fall	Szabolcs-Szatmár-Bereg	SSB_Orchard_1_Újfehértó	Salticidae	Carrhotus xanthogramma	C_xanthogramma	subadult	Male	2.3		Sternorrhyncha	Sternorrhyncha	Aphididae			pest	imago, winged
733	2017.10.13.	2017	10	Fall	Szabolcs-Szatmár-Bereg	SSB_Orchard_1_Újfehértó	Salticidae	Carrhotus xanthogramma	C_xanthogramma	subadult	Female	2.4	0.333333	Sternorrhyncha	Sternorrhyncha	Aphididae		0.8	pest	imago, winged
734	2017.10.12.	2017	10	Fall	Szabolcs-Szatmár-Bereg	SSB_Orchard_1_Újfehértó	Salticidae	Carrhotus xanthogramma	C_xanthogramma	subadult	Male	2.6	0.307692	Sternorrhyncha	Sternorrhyncha	Aphididae		0.8	pest	imago, winged
735	2017.10.12.	2017	10	Fall	Szabolcs-Szatmár-Bereg	SSB_Orchard_1_Újfehértó	Salticidae	Carrhotus xanthogramma	C_xanthogramma	subadult	Female	2.5	0.32	Sternorrhyncha	Sternorrhyncha	Aphididae		0.8	pest	imago, winged
736	2013.06.20.	2013	6	Summer	Szabolcs-Szatmár-Bereg	SSB_Orchard_1_Újfehértó	Salticidae	Heliophanus auratus	Other_salticids	adult	Male			Sternorrhyncha	Sternorrhyncha	Aphididae	Aphis pomi		pest	imago, winged
737	2013.07.30.	2013	7	Summer	Szabolcs-Szatmár-Bereg	SSB_Orchard_1_Újfehértó	Salticidae	Carrhotus xanthogramma	C_xanthogramma	juv				Sternorrhyncha	Sternorrhyncha	Aphididae	Aphis pomi		pest	imago, wingless
738	2013.07.31.	2013	7	Summer	Szabolcs-Szatmár-Bereg	SSB_Orchard_1_Újfehértó	Salticidae	Heliophanus cupreus	Other_salticids	juv				Sternorrhyncha	Sternorrhyncha	Aphididae	Aphis pomi		pest	imago, wingless
739	2013.08.02.	2013	8	Summer	Szabolcs-Szatmár-Bereg	SSB_Orchard_1_Újfehértó	Clubionidae	Clubiona sp.	Clubiona	juv				Sternorrhyncha	Sternorrhyncha	Aphididae	Aphis pomi		pest	imago, wingless
740	2015.07.02.	2015	7	Summer	Szabolcs-Szatmár-Bereg	SSB_Orchard_1_Újfehértó	Salticidae	Carrhotus xanthogramma	C_xanthogramma	juv				Heteroptera	Heteroptera	Anthocoridae	Orius sp.		natural_enemy	larva
741	2015.07.02.	2015	7	Summer	Szabolcs-Szatmár-Bereg	SSB_Orchard_1_Újfehértó	Thomisidae	Xysticus sp.	Xysticus	juv				Sternorrhyncha	Sternorrhyncha	Aphididae	Aphis pomi		pest	imago, winged
742	2014.07.01.	2014	7	Summer	Szabolcs-Szatmár-Bereg	SSB_Orchard_1_Újfehértó	Salticidae	Heliophanus sp.	Other_salticids					Neuroptera	Other prey				natural_enemy	eggs
743	2018.04.09.	2018	4	Spring	Szabolcs-Szatmár-Bereg	SSB_Orchard_1_Újfehértó	Thomisidae	Ebrechtella tricuspidata	E_tricuspidata	subadult	Female	2.1	0.761905	Coleoptera	Coleoptera			1.6	neutral
744	2018.04.21.	2018	4	Spring	Szabolcs-Szatmár-Bereg	SSB_Orchard_1_Újfehértó	Thomisidae	Misumena vatia		juv		1.4	1.14286	Brachycera	Brachycera	Brachycera		1.6	neutral
745	2018.04.29.	2018	4	Spring	Szabolcs-Szatmár-Bereg	SSB_Orchard_1_Újfehértó	Thomisidae	Xysticus kochi	Xysticus	adult	Female	3.3	0.69697	Coleoptera	Coleoptera	Curculionidae	Phyllobius betulinus	2.3	pest
746	2018.04.26.	2018	4	Spring	Szabolcs-Szatmár-Bereg	SSB_Orchard_1_Újfehértó	Thomisidae	Xysticus kochi	Xysticus	adult	Female	2.9	0.655172	Coleoptera	Coleoptera	Cerambycidae	Pogonocherus hispidus	1.9	pest
747	2018.04.23.	2018	4	Spring	Szabolcs-Szatmár-Bereg	SSB_Orchard_1_Újfehértó	Salticidae	Macaroeris nidicolens	Other_salticids	subadult	Female	1.9	0.894737	Araneae	Araneae	Philodromidae	Philodromus cespitum	1.7	natural_enemy	subadult male
748	2018.04.09.	2018	4	Spring	Szabolcs-Szatmár-Bereg	SSB_Orchard_1_Újfehértó	Salticidae	Salticus scenicus	Other_salticids	subadult	Female	1.5	0.4	Nematocera	Nematocera	Nematocera		0.6	neutral
749	2018.04.27.	2018	4	Spring	Szabolcs-Szatmár-Bereg	SSB_Orchard_1_Újfehértó	Salticidae	Carrhotus xanthogramma	C_xanthogramma	adult	Female	2.8	0.892857	Araneae	Araneae	Salticidae	Carrhotus xanthogramma	2.5	natural_enemy	adult female
750	2018.04.20.	2018	4	Spring	Szabolcs-Szatmár-Bereg	SSB_Orchard_1_Újfehértó	Philodromidae	Philodromus cespitum	Ph_cespitum	juv		1.5	0.6	Nematocera	Nematocera	Nematocera		0.9	neutral
751	2018.04.18.	2018	4	Spring	Szabolcs-Szatmár-Bereg	SSB_Orchard_1_Újfehértó	Philodromidae	Philodromus cespitum	Ph_cespitum	juv		1.7	0.882353	Brachycera	Brachycera	Brachycera		1.5	neutral
752	2018.04.16.	2018	4	Spring	Szabolcs-Szatmár-Bereg	SSB_Orchard_1_Újfehértó	Philodromidae	Philodromus cespitum	Ph_cespitum	juv		1.4	1	Nematocera	Nematocera	Nematocera		1.4	neutral
753	2018.04.21.	2018	4	Spring	Szabolcs-Szatmár-Bereg	SSB_Orchard_1_Újfehértó	Philodromidae	Philodromus cespitum	Ph_cespitum	juv		1.4	0.428571	Nematocera	Nematocera	Nematocera		0.6	neutral
754	2018.04.21.	2018	4	Spring	Szabolcs-Szatmár-Bereg	SSB_Orchard_1_Újfehértó	Philodromidae	Philodromus cespitum	Ph_cespitum	juv		1.6	1.3125	Heteroptera	Heteroptera	Miridae	Agnocoris sp.	2.1	natural_enemy
755	2018.04.23.	2018	4	Spring	Szabolcs-Szatmár-Bereg	SSB_Orchard_1_Újfehértó	Philodromidae	Philodromus cespitum	Ph_cespitum	juv		1.6	0.875	Brachycera	Brachycera	Brachycera		1.4	neutral
756	2018.04.21.	2018	4	Spring	Szabolcs-Szatmár-Bereg	SSB_Orchard_1_Újfehértó	Philodromidae	Philodromus cespitum	Ph_cespitum	juv		1.6	0.875	Brachycera	Brachycera	Brachycera		1.4	neutral
757	2018.04.21.	2018	4	Spring	Szabolcs-Szatmár-Bereg	SSB_Orchard_1_Újfehértó	Philodromidae	Philodromus cespitum	Ph_cespitum	subadult	Male	2.3	0.391304	Araneae	Araneae	Linyphiidae	Erigone dentipalpis	0.9	natural_enemy	adult female
758	2018.05.02.	2018	5	Spring	Szabolcs-Szatmár-Bereg	SSB_Orchard_1_Újfehértó	Thomisidae	Misumena vatia		adult	Female	3	0.633333	Coleoptera	Coleoptera	Curculionidae	Phyllobius oblongus	1.9	pest
759	2018.05.03.	2018	5	Spring	Szabolcs-Szatmár-Bereg	SSB_Orchard_1_Újfehértó	Thomisidae	Misumena vatia		juv		1.9	0.842105	Coleoptera	Coleoptera	Curculionidae	Phyllobius virideaeris	1.6	pest
760	2018.05.03.	2018	5	Spring	Szabolcs-Szatmár-Bereg	SSB_Orchard_1_Újfehértó	Thomisidae	Xysticus kochi	Xysticus	adult	Female	3.1	0.709677	Coleoptera	Coleoptera	Curculionidae	Phyllobius virideaeris	2.2	pest
761	2018.05.02.	2018	5	Spring	Szabolcs-Szatmár-Bereg	SSB_Orchard_1_Újfehértó	Cheiracanthiidae	Cheiracanthium sp.		juv		1.3	0.384615	Sternorrhyncha	Sternorrhyncha	Aphididae		0.5	pest	imago, winged
762	2018.05.03.	2018	5	Spring	Szabolcs-Szatmár-Bereg	SSB_Orchard_1_Újfehértó	Clubionidae	Clubiona frutetorum	Clubiona	adult	Male	1.8	0.333333	Sternorrhyncha	Sternorrhyncha	Aphididae	Aphis sp.	0.6	pest
763	2018.05.02.	2018	5	Spring	Szabolcs-Szatmár-Bereg	SSB_Orchard_1_Újfehértó	Clubionidae	Clubiona frutetorum	Clubiona	adult	Female	2.1	0.761905	Nematocera	Nematocera	Nematocera		1.6	neutral
764	2018.05.03.	2018	5	Spring	Szabolcs-Szatmár-Bereg	SSB_Orchard_1_Újfehértó	Clubionidae	Clubiona sp.	Clubiona					Sternorrhyncha	Sternorrhyncha	Aphididae			pest
765	2018.05.03.	2018	5	Spring	Szabolcs-Szatmár-Bereg	SSB_Orchard_1_Újfehértó	Clubionidae	Clubiona frutetorum	Clubiona	adult	Female	2.2		Sternorrhyncha	Sternorrhyncha	Aphididae			pest
766	2018.05.02.	2018	5	Spring	Szabolcs-Szatmár-Bereg	SSB_Orchard_1_Újfehértó	Clubionidae	Clubiona sp.	Clubiona	subadult	Male	1.5		Sternorrhyncha	Sternorrhyncha	Aphididae			pest
767	2018.05.02.	2018	5	Spring	Szabolcs-Szatmár-Bereg	SSB_Orchard_1_Újfehértó	Clubionidae	Clubiona frutetorum	Clubiona	adult	Female	1.8		Sternorrhyncha	Sternorrhyncha	Aphididae			pest
768	2018.05.02.	2018	5	Spring	Szabolcs-Szatmár-Bereg	SSB_Orchard_1_Újfehértó	Clubionidae	Clubiona sp.	Clubiona	subadult	Female	1.7		Brachycera	Brachycera	Brachycera			neutral
769	2018.05.02.	2018	5	Spring	Szabolcs-Szatmár-Bereg	SSB_Orchard_1_Újfehértó	Oxyopidae	Oxyopes ramosus		adult	Male	2.5	0.64	Coleoptera	Coleoptera	Curculionidae	Phyllobius oblongus	1.6	pest
770	2018.05.02.	2018	5	Spring	Szabolcs-Szatmár-Bereg	SSB_Orchard_1_Újfehértó	Salticidae	Salticus scenicus	Other_salticids	adult	Male	1.8	0.333333	Sternorrhyncha	Sternorrhyncha	Aphididae		0.6	pest	imago, winged
771	2018.05.04.	2018	5	Spring	Szabolcs-Szatmár-Bereg	SSB_Orchard_1_Újfehértó	Salticidae	Evarcha falcata	Other_salticids	adult	Female	2.3	0.652174	Araneae	Araneae	Salticidae	Heliophanus cupreus	1.5	natural_enemy
772	2018.05.04.	2018	5	Spring	Szabolcs-Szatmár-Bereg	SSB_Orchard_1_Újfehértó	Salticidae	Marpissa muscosa	Other_salticids	adult	Female	2.6	0.307692	Other Hymenoptera	Other Hymenoptera			0.8	natural_enemy	Hymenoptera parasitica
773	2018.05.03.	2018	5	Spring	Szabolcs-Szatmár-Bereg	SSB_Orchard_1_Újfehértó	Salticidae	Heliophanus cupreus	Other_salticids	adult	Female	1.5	1.06667	Brachycera	Brachycera	Brachycera		1.6	neutral
774	2018.05.02.	2018	5	Spring	Szabolcs-Szatmár-Bereg	SSB_Orchard_1_Újfehértó	Salticidae	Heliophanus cupreus	Other_salticids	adult	Female	1.7	0.705882	Araneae	Araneae	Lycosidae		1.2	natural_enemy
775	2018.05.02.	2018	5	Spring	Szabolcs-Szatmár-Bereg	SSB_Orchard_1_Újfehértó	Salticidae	Heliophanus cupreus	Other_salticids	adult	Female	1.6	0.6875	Brachycera	Brachycera	Brachycera		1.1	neutral
776	2018.05.03.	2018	5	Spring	Szabolcs-Szatmár-Bereg	SSB_Orchard_1_Újfehértó	Salticidae	Heliophanus cupreus	Other_salticids	adult	Female	1.7	1	Nematocera	Nematocera	Nematocera		1.7	neutral
777	2018.05.03.	2018	5	Spring	Szabolcs-Szatmár-Bereg	SSB_Orchard_1_Újfehértó	Salticidae	Heliophanus cupreus	Other_salticids	adult	Female	1.6	0.5	Coleoptera	Coleoptera	Curculionidae	Rhamphus sp.	0.8	pest
778	2018.05.03.	2018	5	Spring	Szabolcs-Szatmár-Bereg	SSB_Orchard_1_Újfehértó	Salticidae	Heliophanus cupreus	Other_salticids	adult	Female	1.7	0.411765	Sternorrhyncha	Sternorrhyncha	Aphididae		0.7	pest	imago, winged
779	2018.05.03.	2018	5	Spring	Szabolcs-Szatmár-Bereg	SSB_Orchard_1_Újfehértó	Salticidae	Heliophanus cupreus	Other_salticids	adult	Female	1.7		Sternorrhyncha	Sternorrhyncha	Aphididae			pest
780	2018.05.03.	2018	5	Spring	Szabolcs-Szatmár-Bereg	SSB_Orchard_1_Újfehértó	Salticidae	Carrhotus xanthogramma	C_xanthogramma	adult	Male	2.3	0.391304	Sternorrhyncha	Sternorrhyncha	Aphididae		0.9	pest
781	2018.05.03.	2018	5	Spring	Szabolcs-Szatmár-Bereg	SSB_Orchard_1_Újfehértó	Salticidae	Carrhotus xanthogramma	C_xanthogramma	adult	Female	2.3	0.608696	Araneae	Araneae	Araneidae		1.4	natural_enemy
782	2018.05.03.	2018	5	Spring	Szabolcs-Szatmár-Bereg	SSB_Orchard_1_Újfehértó	Salticidae	Carrhotus xanthogramma	C_xanthogramma	adult	Female	2.8	0.607143	Coleoptera	Coleoptera	Curculionidae	Phyllobius virideaeris	1.7	pest
783	2018.05.04.	2018	5	Spring	Szabolcs-Szatmár-Bereg	SSB_Orchard_1_Újfehértó	Salticidae	Carrhotus xanthogramma	C_xanthogramma	adult	Female	2.8	0.857143	Araneae	Araneae	Salticidae	Carrhotus xanthogramma	2.4	natural_enemy
784	2018.05.03.	2018	5	Spring	Szabolcs-Szatmár-Bereg	SSB_Orchard_1_Újfehértó	Salticidae	Carrhotus xanthogramma	C_xanthogramma	adult	Female	2.7	0.666667	Coleoptera	Coleoptera	Curculionidae	Phyllobius virideaeris	1.8	pest
785	2018.05.04.	2018	5	Spring	Szabolcs-Szatmár-Bereg	SSB_Orchard_1_Újfehértó	Salticidae	Carrhotus xanthogramma	C_xanthogramma	adult	Female	2.7	0.777778	Brachycera	Brachycera	Syrphidae	Syrphidae sp.	2.1	natural_enemy	imago
786	2018.05.02.	2018	5	Spring	Szabolcs-Szatmár-Bereg	SSB_Orchard_1_Újfehértó	Salticidae	Carrhotus xanthogramma	C_xanthogramma	adult	Female	2.7	0.592593	Coleoptera	Coleoptera	Curculionidae	Phyllobius virideaeris	1.6	pest
787	2018.05.02.	2018	5	Spring	Szabolcs-Szatmár-Bereg	SSB_Orchard_1_Újfehértó	Salticidae	Carrhotus xanthogramma	C_xanthogramma	adult	Female	2.3	0.478261	Heteroptera	Heteroptera	Tingidae	Stephanitis pyri	1.1	pest
788	2018.05.03.	2018	5	Spring	Szabolcs-Szatmár-Bereg	SSB_Orchard_1_Újfehértó	Salticidae	Carrhotus xanthogramma	C_xanthogramma	adult	Female	2.5	0.64	Coleoptera	Coleoptera	Curculionidae	Phyllobius virideaeris	1.6	pest
789	2018.05.03.	2018	5	Spring	Szabolcs-Szatmár-Bereg	SSB_Orchard_1_Újfehértó	Salticidae	Carrhotus xanthogramma	C_xanthogramma	adult	Female	2.7	0.814815	Araneae	Araneae	Salticidae	Carrhotus xanthogramma	2.2	natural_enemy
790	2018.05.02.	2018	5	Spring	Szabolcs-Szatmár-Bereg	SSB_Orchard_1_Újfehértó	Salticidae	Carrhotus xanthogramma	C_xanthogramma	adult	Female	2.8	0.964286	Brachycera	Brachycera	Syrphidae	Episyrphus balteatus	2.7	natural_enemy	imago
791	2018.05.03.	2018	5	Spring	Szabolcs-Szatmár-Bereg	SSB_Orchard_1_Újfehértó	Salticidae	Carrhotus xanthogramma	C_xanthogramma	adult	Female	2.4	0.625	Nematocera	Nematocera	Nematocera	Tipulomorpha sp.	1.5	neutral
792	2018.05.04.	2018	5	Spring	Szabolcs-Szatmár-Bereg	SSB_Orchard_1_Újfehértó	Salticidae	Carrhotus xanthogramma	C_xanthogramma	adult	Female	2.6		Nematocera	Nematocera	Nematocera			neutral
793	2018.05.03.	2018	5	Spring	Szabolcs-Szatmár-Bereg	SSB_Orchard_1_Újfehértó	Salticidae	Carrhotus xanthogramma	C_xanthogramma	adult	Female	2.6	0.615385	Brachycera	Brachycera	Brachycera		1.6	neutral
794	2018.05.04.	2018	5	Spring	Szabolcs-Szatmár-Bereg	SSB_Orchard_1_Újfehértó	Salticidae	Carrhotus xanthogramma	C_xanthogramma	adult	Female	2.7	0.518519	Nematocera	Nematocera	Nematocera	Bibio sp.	1.4	neutral
795	2018.05.03.	2018	5	Spring	Szabolcs-Szatmár-Bereg	SSB_Orchard_1_Újfehértó	Salticidae	Carrhotus xanthogramma	C_xanthogramma	adult	Female	2.7	0.740741	Trichoptera	Other prey			2	neutral
796	2018.05.02.	2018	5	Spring	Szabolcs-Szatmár-Bereg	SSB_Orchard_1_Újfehértó	Salticidae	Carrhotus xanthogramma	C_xanthogramma	adult	Female	2.7	0.259259	Nematocera	Nematocera	Nematocera		0.7	neutral
797	2018.05.04.	2018	5	Spring	Szabolcs-Szatmár-Bereg	SSB_Orchard_1_Újfehértó	Salticidae	Carrhotus xanthogramma	C_xanthogramma	adult	Female	2.7	0.259259	Heteroptera	Heteroptera	Tingidae	Stephanitis pyri	0.7	pest
798	2018.05.29.	2018	5	Spring	Szabolcs-Szatmár-Bereg	SSB_Orchard_1_Újfehértó	Salticidae	Heliophanus cupreus	Other_salticids	adult	Female	1.7	0.823529	Brachycera	Brachycera	Brachycera		1.4	neutral
799	2018.06.19.	2018	6	Summer	Pest	P_Orchard_1	Philodromidae	Philodromus cespitum	Ph_cespitum	adult	Female	2.2	1.18182	Brachycera	Brachycera	Brachycera		2.6	neutral
800	2018.07.04.	2018	7	Summer	Szabolcs-Szatmár-Bereg	SSB_Orchard_1_Újfehértó	Thomisidae	Ebrechtella tricuspidata	E_tricuspidata	adult	Female	2	0.75	Brachycera	Brachycera	Brachycera		1.5	neutral
801	2018.07.05.	2018	7	Summer	Szabolcs-Szatmár-Bereg	SSB_Orchard_1_Újfehértó	Thomisidae	Xysticus (Spiracme) striatipes	Xysticus	juv		1.8	0.388889	Formicidae	Formicidae	Formicidae		0.7	neutral	worker
802	2018.07.04.	2018	7	Summer	Szabolcs-Szatmár-Bereg	SSB_Orchard_1_Újfehértó	Thomisidae	Xysticus acerbus	Xysticus	juv		1.6	0.5	Coleoptera	Coleoptera	Chrysomelidae	Longitarsus sp.	0.8	neutral
803	2018.07.04.	2018	7	Summer	Szabolcs-Szatmár-Bereg	SSB_Orchard_1_Újfehértó	Cheiracanthiidae	Cheiracanthium cf. virescens		subadult	Male	2.7		Lepidoptera	Lepidoptera	cf. Tortricidae			pest	larva
804	2018.07.04.	2018	7	Summer	Szabolcs-Szatmár-Bereg	SSB_Orchard_1_Újfehértó	Salticidae	Heliophanus cupreus	Other_salticids	adult	Female	1.7	0.352941	Sternorrhyncha	Sternorrhyncha	Aphididae	Aphis sp.	0.6	pest	imago, winged
805	2018.07.05.	2018	7	Summer	Szabolcs-Szatmár-Bereg	SSB_Orchard_1_Újfehértó	Salticidae	Carrhotus xanthogramma	C_xanthogramma	juv		1.3	0.615385	Sternorrhyncha	Sternorrhyncha	Aphididae		0.8	pest	imago, winged
806	2018.07.04.	2018	7	Summer	Szabolcs-Szatmár-Bereg	SSB_Orchard_1_Újfehértó	Salticidae	Carrhotus xanthogramma	C_xanthogramma	juv		1.5	0.733333	Formicidae	Formicidae	Formicidae		1.1	neutral	winged male
807	2018.07.02.	2018	7	Summer	Szabolcs-Szatmár-Bereg	SSB_Orchard_1_Újfehértó	Salticidae	Carrhotus xanthogramma	C_xanthogramma	juv		1.4	0.714286	Brachycera	Brachycera	Brachycera		1	neutral
808	2018.07.05.	2018	7	Summer	Szabolcs-Szatmár-Bereg	SSB_Orchard_1_Újfehértó	Salticidae	Carrhotus xanthogramma	C_xanthogramma	juv		1.5	0.8	Araneae	Araneae	Salticidae	Carrhotus xanthogramma	1.2	natural_enemy
809	2018.07.05.	2018	7	Summer	Szabolcs-Szatmár-Bereg	SSB_Orchard_1_Újfehértó	Salticidae	Carrhotus xanthogramma	C_xanthogramma	juv		1.6	1.3125	Brachycera	Brachycera	Brachycera		2.1	neutral
810	2018.07.05.	2018	7	Summer	Szabolcs-Szatmár-Bereg	SSB_Orchard_1_Újfehértó	Salticidae	Carrhotus xanthogramma	C_xanthogramma	juv		1.5	0.8	Formicidae	Formicidae	Formicidae		1.2	neutral	winged male
811	2018.07.04.	2018	7	Summer	Szabolcs-Szatmár-Bereg	SSB_Orchard_1_Újfehértó	Salticidae	Carrhotus xanthogramma	C_xanthogramma	juv		1.5	0.8	Araneae	Araneae	Salticidae	Carrhotus xanthogramma	1.2	natural_enemy
812	2018.07.05.	2018	7	Summer	Szabolcs-Szatmár-Bereg	SSB_Orchard_1_Újfehértó	Salticidae	Carrhotus xanthogramma	C_xanthogramma	juv		1.5	0.533333	Sternorrhyncha	Sternorrhyncha	Aphididae	Aphis sp.	0.8	pest
813	2018.07.05.	2018	7	Summer	Szabolcs-Szatmár-Bereg	SSB_Orchard_1_Újfehértó	Salticidae	Carrhotus xanthogramma	C_xanthogramma	juv		1.6	0.5625	Coleoptera	Coleoptera			0.9	neutral
814	2018.07.05.	2018	7	Summer	Szabolcs-Szatmár-Bereg	SSB_Orchard_1_Újfehértó	Salticidae	Carrhotus xanthogramma	C_xanthogramma	juv		1.3		Neuroptera	Other prey				natural_enemy	larva
815	2018.07.25.	2018	7	Summer	Szabolcs-Szatmár-Bereg	SSB_Orchard_1_Újfehértó	Thomisidae	Xysticus sp.	Xysticus	juv		1.2	0.75	Formicidae	Formicidae	Formicidae		0.9	neutral	worker
816	2018.07.25.	2018	7	Summer	Szabolcs-Szatmár-Bereg	SSB_Orchard_1_Újfehértó	Cheiracanthiidae	Cheiracanthium sp.		juv		1.7	1.47059	Auchenorrhyncha	Auchenorrhyncha	Flatidae	Metcalfa pruinosa	2.5	pest	imago
817	2018.07.25.	2018	7	Summer	Szabolcs-Szatmár-Bereg	SSB_Orchard_1_Újfehértó	Salticidae	Carrhotus xanthogramma	C_xanthogramma	juv		1.9	0.789474	Araneae	Araneae	Salticidae	Carrhotus xanthogramma	1.5	natural_enemy
818	2018.08.07.	2018	8	Summer	Szabolcs-Szatmár-Bereg	SSB_Orchard_1_Újfehértó	Salticidae	Carrhotus xanthogramma	C_xanthogramma	juv				Formicidae	Formicidae	Formicidae		0.9	neutral	worker
819	2018.08.07.	2018	8	Summer	Szabolcs-Szatmár-Bereg	SSB_Orchard_1_Újfehértó	Salticidae	Carrhotus xanthogramma	C_xanthogramma	juv		2	0.5	Heteroptera	Heteroptera	Tingidae	Stephanitis pyri	1	pest
820	2018.08.07.	2018	8	Summer	Szabolcs-Szatmár-Bereg	SSB_Orchard_1_Újfehértó	Salticidae	Carrhotus xanthogramma	C_xanthogramma	juv		1.9	0.631579	Brachycera	Brachycera	Brachycera		1.2	neutral
821	2018.08.07.	2018	8	Summer	Szabolcs-Szatmár-Bereg	SSB_Orchard_1_Újfehértó	Salticidae	Carrhotus xanthogramma	C_xanthogramma	juv		2.3	0.956522	Brachycera	Brachycera	Brachycera		2.2	neutral
822	2018.08.07.	2018	8	Summer	Szabolcs-Szatmár-Bereg	SSB_Orchard_1_Újfehértó	Salticidae	Carrhotus xanthogramma	C_xanthogramma	juv		2.1	1	Brachycera	Brachycera	Brachycera		2.1	neutral
823	2018.08.06.	2018	8	Summer	Szabolcs-Szatmár-Bereg	SSB_Orchard_1_Újfehértó	Salticidae	Carrhotus xanthogramma	C_xanthogramma	juv		2	1.05	Brachycera	Brachycera	Brachycera		2.1	neutral
824	2018.08.07.	2018	8	Summer	Szabolcs-Szatmár-Bereg	SSB_Orchard_1_Újfehértó	Salticidae	Carrhotus xanthogramma	C_xanthogramma	juv		2.2	0.954545	Brachycera	Brachycera	Brachycera		2.1	neutral
825	2018.08.07.	2018	8	Summer	Szabolcs-Szatmár-Bereg	SSB_Orchard_1_Újfehértó	Salticidae	Carrhotus xanthogramma	C_xanthogramma	juv		1.8	0.555556	Heteroptera	Heteroptera	Anthocoridae	Orius sp.	1	natural_enemy
826	2018.08.07.	2018	8	Summer	Szabolcs-Szatmár-Bereg	SSB_Orchard_1_Újfehértó	Salticidae	Carrhotus xanthogramma	C_xanthogramma	juv		2	0.7	Heteroptera	Heteroptera	Miridae	cf. Campylomma sp.	1.4	natural_enemy
827	2018.08.07.	2018	8	Summer	Szabolcs-Szatmár-Bereg	SSB_Orchard_1_Újfehértó	Salticidae	Carrhotus xanthogramma	C_xanthogramma	juv		2	0.55	Heteroptera	Heteroptera	Miridae	cf. Campylomma sp.	1.1	natural_enemy
828	2018.08.09.	2018	8	Summer	Szabolcs-Szatmár-Bereg	SSB_Orchard_1_Újfehértó	Salticidae	Heliophanus cupreus	Other_salticids	juv		1.3	0.769231	Heteroptera	Heteroptera	Anthocoridae	Orius sp.	1	natural_enemy
829	2018.08.10.	2018	8	Summer	Szabolcs-Szatmár-Bereg	SSB_Orchard_1_Újfehértó	Salticidae	Carrhotus xanthogramma	C_xanthogramma	juv		2.1	0.904762	Brachycera	Brachycera	Brachycera		1.9	neutral
830	2018.08.14.	2018	8	Summer	Szabolcs-Szatmár-Bereg	SSB_Orchard_1_Újfehértó	Clubionidae	Clubiona sp.	Clubiona	juv		1.2	0.833333	Heteroptera	Heteroptera	Miridae	Campylomma verbasci	1	natural_enemy	male imago
831	2018.08.07.	2018	8	Summer	Pest	P_Orchard_1	Thomisidae	Ebrechtella tricuspidata	E_tricuspidata	juv		1.7	0.529412	Araneae	Araneae			0.9	natural_enemy
832	2018.08.07.	2018	8	Summer	Pest	P_Orchard_1	Thomisidae	Ebrechtella tricuspidata	E_tricuspidata	juv		1.6	0.375	Nematocera	Nematocera	Nematocera		0.6	neutral
833	2018.08.07.	2018	8	Summer	Pest	P_Orchard_1	Thomisidae	Ebrechtella tricuspidata	E_tricuspidata	subadult	Female	1.7	1.41176	Heteroptera	Heteroptera	Miridae	Adelphocoris lineolatus	2.4	neutral
834	2018.08.07.	2018	8	Summer	Pest	P_Orchard_1	Thomisidae	Ebrechtella tricuspidata	E_tricuspidata	subadult	Male	1.7	1.23529	Heteroptera	Heteroptera	Miridae	Adelphocoris lineolatus	2.1	neutral
835	2018.08.07.	2018	8	Summer	Pest	P_Orchard_1	Salticidae	Macaroeris nidicolens	Other_salticids	adult	Female	1.9	1.10526	Heteroptera	Heteroptera	Miridae	Adelphocoris lineolatus	2.1	neutral
836	2018.08.07.	2018	8	Summer	Pest	P_Orchard_1	Salticidae	Pseudicius encarpatus	Other_salticids	adult	Male	1.8	1	Heteroptera	Heteroptera	Miridae		1.8	neutral
837	2018.09.14.	2018	9	Fall	Szabolcs-Szatmár-Bereg	SSB_Orchard_1_Újfehértó	Cheiracanthiidae	Cheiracanthium sp.		subadult	Male	2.6	0.538462	Araneae	Araneae	Clubionidae	Clubiona sp.	1.4	natural_enemy
838	2018.09.14.	2018	9	Fall	Szabolcs-Szatmár-Bereg	SSB_Orchard_1_Újfehértó	Clubionidae	Clubiona sp.	Clubiona	juv		1.4	0.785714	Araneae	Araneae	Thomisidae	Xysticus sp.	1.1	natural_enemy
839	2018.09.14.	2018	9	Fall	Szabolcs-Szatmár-Bereg	SSB_Orchard_1_Újfehértó	Clubionidae	Clubiona sp.	Clubiona	juv		1.2	0.833333	Brachycera	Brachycera	Brachycera		1	neutral
840	2018.09.14.	2018	9	Fall	Szabolcs-Szatmár-Bereg	SSB_Orchard_1_Újfehértó	Clubionidae	Clubiona sp.	Clubiona	juv		1	1	Brachycera	Brachycera	Brachycera		1	neutral
841	2018.09.14.	2018	9	Fall	Szabolcs-Szatmár-Bereg	SSB_Orchard_1_Újfehértó	Clubionidae	Clubiona sp.	Clubiona	juv		1.4	0.642857	Araneae	Araneae	Clubionidae	Clubiona sp.	0.9	natural_enemy
842	2018.09.14.	2018	9	Fall	Szabolcs-Szatmár-Bereg	SSB_Orchard_1_Újfehértó	Clubionidae	Clubiona sp.	Clubiona	juv		1.3	0.846154	Brachycera	Brachycera	Brachycera		1.1	neutral
843	2018.09.14.	2018	9	Fall	Szabolcs-Szatmár-Bereg	SSB_Orchard_1_Újfehértó	Clubionidae	Clubiona sp.	Clubiona	juv		1	0.8	Sternorrhyncha	Sternorrhyncha	Aphididae		0.8	pest	imago, winged
844	2018.09.14.	2018	9	Fall	Szabolcs-Szatmár-Bereg	SSB_Orchard_1_Újfehértó	Clubionidae	Clubiona sp.	Clubiona	juv		0.9	0.888889	Brachycera	Brachycera	Brachycera		0.8	neutral
845	2018.09.14.	2018	9	Fall	Szabolcs-Szatmár-Bereg	SSB_Orchard_1_Újfehértó	Clubionidae	Clubiona sp.	Clubiona	juv		1.5		Auchenorrhyncha	Auchenorrhyncha	Cicadellidae			neutral
846	2018.09.14.	2018	9	Fall	Szabolcs-Szatmár-Bereg	SSB_Orchard_1_Újfehértó	Clubionidae	Clubiona sp.	Clubiona	juv		1.7	0.647059	Araneae	Araneae	Clubionidae	Clubiona sp.	1.1	natural_enemy
847	2018.09.15.	2018	9	Fall	Szabolcs-Szatmár-Bereg	SSB_Orchard_1_Újfehértó	Cheiracanthiidae	Cheiracanthium sp.		juv		1.6	0.8125	Ephemeroptera	Other prey			1.3	neutral
848	2018.09.14.	2018	9	Fall	Szabolcs-Szatmár-Bereg	SSB_Orchard_1_Újfehértó	Salticidae	Salticus sp.	Other_salticids	juv		1.1	0.454545	Other Hymenoptera	Other Hymenoptera			0.5	natural_enemy	Hymenoptera parasitica
849	2018.09.15.	2018	9	Fall	Szabolcs-Szatmár-Bereg	SSB_Orchard_1_Újfehértó	Salticidae	Carrhotus xanthogramma	C_xanthogramma	subadult	Male	2.2	0.636364	Brachycera	Brachycera	Brachycera		1.4	neutral
850	2018.09.15.	2018	9	Fall	Szabolcs-Szatmár-Bereg	SSB_Orchard_1_Újfehértó	Salticidae	Carrhotus xanthogramma	C_xanthogramma	subadult	Female	2.6	0.346154	Sternorrhyncha	Sternorrhyncha	Aphididae	Dysaphis sp.	0.9	pest	imago, winged
851	2018.09.15.	2018	9	Fall	Szabolcs-Szatmár-Bereg	SSB_Orchard_1_Újfehértó	Salticidae	Carrhotus xanthogramma	C_xanthogramma	subadult	Female	2.4	0.458333	Nematocera	Nematocera	Nematocera		1.1	neutral
852	2018.09.15.	2018	9	Fall	Szabolcs-Szatmár-Bereg	SSB_Orchard_1_Újfehértó	Salticidae	Carrhotus xanthogramma	C_xanthogramma	subadult	Male	2.6	0.269231	Sternorrhyncha	Sternorrhyncha	Aphididae	Dysaphis sp.	0.7	pest	imago, winged
853	2018.09.15.	2018	9	Fall	Szabolcs-Szatmár-Bereg	SSB_Orchard_1_Újfehértó	Salticidae	Carrhotus xanthogramma	C_xanthogramma	subadult	Female	2.3	1	Auchenorrhyncha	Auchenorrhyncha	Flatidae	Metcalfa pruinosa	2.3	pest	imago
854	2018.09.16.	2018	9	Fall	Szabolcs-Szatmár-Bereg	SSB_Orchard_1_Újfehértó	Salticidae	Carrhotus xanthogramma	C_xanthogramma	subadult	Female	2.1	0.571429	Araneae	Araneae	Philodromidae	Philodromus cespitum	1.2	natural_enemy
855	2018.09.15.	2018	9	Fall	Szabolcs-Szatmár-Bereg	SSB_Orchard_1_Újfehértó	Salticidae	Carrhotus xanthogramma	C_xanthogramma	subadult	Female	2.3	0.347826	Sternorrhyncha	Sternorrhyncha	Aphididae	Dysaphis sp.	0.8	pest	imago, winged
856	2018.09.15.	2018	9	Fall	Szabolcs-Szatmár-Bereg	SSB_Orchard_1_Újfehértó	Salticidae	Carrhotus xanthogramma	C_xanthogramma	subadult	Female	2.3	0.347826	Psocoptera	Other prey			0.8	neutral	imago, winged
857	2018.09.15.	2018	9	Fall	Szabolcs-Szatmár-Bereg	SSB_Orchard_1_Újfehértó	Salticidae	Carrhotus xanthogramma	C_xanthogramma	subadult	Male	2.7	0.333333	Sternorrhyncha	Sternorrhyncha	Aphididae	Dysaphis sp.	0.9	pest	imago, winged
858	2018.09.15.	2018	9	Fall	Szabolcs-Szatmár-Bereg	SSB_Orchard_1_Újfehértó	Salticidae	Carrhotus xanthogramma	C_xanthogramma	subadult	Male	2.7	0.296296	Sternorrhyncha	Sternorrhyncha	Aphididae	Dysaphis sp.	0.8	pest	imago, winged
859	2018.09.15.	2018	9	Fall	Szabolcs-Szatmár-Bereg	SSB_Orchard_1_Újfehértó	Salticidae	Carrhotus xanthogramma	C_xanthogramma	subadult	Male	2.3	0.478261	Nematocera	Nematocera	Nematocera		1.1	neutral
860	2018.09.15.	2018	9	Fall	Szabolcs-Szatmár-Bereg	SSB_Orchard_1_Újfehértó	Salticidae	Carrhotus xanthogramma	C_xanthogramma	subadult	Female	2.5	0.48	Nematocera	Nematocera	Nematocera		1.2	neutral
861	2018.09.15.	2018	9	Fall	Szabolcs-Szatmár-Bereg	SSB_Orchard_1_Újfehértó	Salticidae	Carrhotus xanthogramma	C_xanthogramma	subadult	Female	2.4	0.333333	Sternorrhyncha	Sternorrhyncha	Aphididae	Dysaphis sp.	0.8	pest	imago, winged
862	2018.09.15.	2018	9	Fall	Szabolcs-Szatmár-Bereg	SSB_Orchard_1_Újfehértó	Salticidae	Carrhotus xanthogramma	C_xanthogramma	subadult	Female	2.4	0.375	Sternorrhyncha	Sternorrhyncha	Aphididae	Dysaphis sp.	0.9	pest	imago, winged
863	2018.09.15.	2018	9	Fall	Szabolcs-Szatmár-Bereg	SSB_Orchard_1_Újfehértó	Salticidae	Carrhotus xanthogramma	C_xanthogramma	subadult	Male	2.6	0.846154	Araneae	Araneae	Salticidae	Carrhotus xanthogramma	2.2	natural_enemy
864	2018.09.14.	2018	9	Fall	Szabolcs-Szatmár-Bereg	SSB_Orchard_1_Újfehértó	Salticidae	Carrhotus xanthogramma	C_xanthogramma					Other Hymenoptera	Other Hymenoptera			1	natural_enemy	Hymenoptera parasitica
865	2018.09.15.	2018	9	Fall	Szabolcs-Szatmár-Bereg	SSB_Orchard_1_Újfehértó	Salticidae	Carrhotus xanthogramma	C_xanthogramma	subadult	Female	2.3	0.347826	Sternorrhyncha	Sternorrhyncha	Aphididae	Dysaphis sp.	0.8	pest	imago, winged
866	2018.09.14.	2018	9	Fall	Szabolcs-Szatmár-Bereg	SSB_Orchard_1_Újfehértó	Salticidae	Carrhotus xanthogramma	C_xanthogramma	subadult	Female	2.4	0.208333	Other Hymenoptera	Other Hymenoptera			0.5	natural_enemy	Hymenoptera parasitica
867	2018.09.15.	2018	9	Fall	Szabolcs-Szatmár-Bereg	SSB_Orchard_1_Újfehértó	Salticidae	Carrhotus xanthogramma	C_xanthogramma	subadult	Male	2.5	0.84	Auchenorrhyncha	Auchenorrhyncha	Flatidae	Metcalfa pruinosa	2.1	pest	imago
868	2018.09.15.	2018	9	Fall	Szabolcs-Szatmár-Bereg	SSB_Orchard_1_Újfehértó	Salticidae	Carrhotus xanthogramma	C_xanthogramma	subadult	Female	2.3	0.347826	Sternorrhyncha	Sternorrhyncha	Aphididae	Dysaphis sp.	0.8	pest	imago, winged
869	2018.09.15.	2018	9	Fall	Szabolcs-Szatmár-Bereg	SSB_Orchard_1_Újfehértó	Salticidae	Carrhotus xanthogramma	C_xanthogramma	subadult	Female	2.3	0.434783	Other Hymenoptera	Other Hymenoptera			1	natural_enemy	Hymenoptera parasitica
870	2018.09.14.	2018	9	Fall	Szabolcs-Szatmár-Bereg	SSB_Orchard_1_Újfehértó	Salticidae	Carrhotus xanthogramma	C_xanthogramma	subadult	Male	2.7	0.814815	Auchenorrhyncha	Auchenorrhyncha	Flatidae	Metcalfa pruinosa	2.2	pest	imago
871	2018.09.14.	2018	9	Fall	Szabolcs-Szatmár-Bereg	SSB_Orchard_1_Újfehértó	Salticidae	Carrhotus xanthogramma	C_xanthogramma	subadult	Female	2.4	0.333333	Sternorrhyncha	Sternorrhyncha	Aphididae	Dysaphis sp.	0.8	pest	imago, winged
872	2018.09.15.	2018	9	Fall	Szabolcs-Szatmár-Bereg	SSB_Orchard_1_Újfehértó	Salticidae	Carrhotus xanthogramma	C_xanthogramma	subadult	Male	2.6	0.346154	Sternorrhyncha	Sternorrhyncha	Aphididae	Dysaphis sp.	0.9	pest	imago, winged
873	2018.09.15.	2018	9	Fall	Szabolcs-Szatmár-Bereg	SSB_Orchard_1_Újfehértó	Salticidae	Carrhotus xanthogramma	C_xanthogramma	subadult	Male	2.1	0.428571	Psocoptera	Other prey			0.9	neutral	imago, winged
874	2018.09.14.	2018	9	Fall	Szabolcs-Szatmár-Bereg	SSB_Orchard_1_Újfehértó	Salticidae	Carrhotus xanthogramma	C_xanthogramma	subadult	Male	2.5	0.4	Brachycera	Brachycera	Brachycera		1	neutral
875	2018.09.15.	2018	9	Fall	Szabolcs-Szatmár-Bereg	SSB_Orchard_1_Újfehértó	Salticidae	Carrhotus xanthogramma	C_xanthogramma	subadult	Female	2.4	1	Auchenorrhyncha	Auchenorrhyncha	Flatidae	Metcalfa pruinosa	2.4	pest	imago
876	2018.09.14.	2018	9	Fall	Szabolcs-Szatmár-Bereg	SSB_Orchard_1_Újfehértó	Salticidae	Carrhotus xanthogramma	C_xanthogramma	subadult	Male	2.5	1	Auchenorrhyncha	Auchenorrhyncha	Flatidae	Metcalfa pruinosa	2.5	pest	imago
877	2018.09.15.	2018	9	Fall	Szabolcs-Szatmár-Bereg	SSB_Orchard_1_Újfehértó	Salticidae	Carrhotus xanthogramma	C_xanthogramma	subadult	Male	2.3	0.434783	Brachycera	Brachycera	Brachycera		1	neutral
878	2018.09.15.	2018	9	Fall	Szabolcs-Szatmár-Bereg	SSB_Orchard_1_Újfehértó	Salticidae	Carrhotus xanthogramma	C_xanthogramma	subadult	Female	2.4	0.375	Sternorrhyncha	Sternorrhyncha	Aphididae	Dysaphis sp.	0.9	pest	imago, winged
