# Supplementary material for: Beyond polyphagy and opportunism: natural prey of hunting spiders in the canopy of apple trees
Source: PeerJ. 2020 Jun 19;8:e9334. doi: 10.7717/peerj.9334 (PMC7307562; doi:10.7717/peerj.9334)
Supplement: Supplemental Information 2 — For detailed information see the Info sheet of the file. [file peerj-08-9334-s002.xlsx]

## Sheet: Info
Supplementary dataset for the article Mezőfi et al., 2020: Beyond polyphagy and opportunism: natural prey of hunting spiders in the canopy of apple trees
Column name
Prey_type	actual (caught by spiders) versus potential (suction sampled) prey
Year	Year of collection: first - 2016, second - 2017
Season	spring, summer, fall
Prey_taxa	Taxonomic categories of the prey: Araneae, Coleoptera, Lepidoptera, Formicidae, Other Hymenoptera, Brachycera, Nematocera, Auchenorrhyncha, Heteroptera, Sternorrhyncha, Other prey
Prey_function	Economic status of the prey item in apple orchards in Central Europe: natural_enemy, neutral, pest (see definitions in the main text).
Abund	Seasonal abundance of the Prey_taxa or Prey_function categories in the given year.
Seasonal_sum_abund	Seasonal abundance of all Prey_taxa or Prey_function categories in the given year.

## Sheet: act_pot_taxonomic
Prey_type	Year	Season	Prey_taxa	Abund	Seasonal_sum_abund
actual	first	Fall	Araneae	2	21
actual	first	Fall	Auchenorrhyncha	2	21
actual	first	Fall	Brachycera	1	21
actual	first	Fall	Coleoptera	0	21
actual	first	Fall	Formicidae	0	21
actual	first	Fall	Heteroptera	1	21
actual	first	Fall	Lepidoptera	2	21
actual	first	Fall	Nematocera	7	21
actual	first	Fall	Other_Hymenoptera	1	21
actual	first	Fall	Other_prey	0	21
actual	first	Fall	Sternorrhyncha	5	21
actual	first	Spring	Araneae	2	86
actual	first	Spring	Auchenorrhyncha	0	86
actual	first	Spring	Brachycera	10	86
actual	first	Spring	Coleoptera	6	86
actual	first	Spring	Formicidae	6	86
actual	first	Spring	Heteroptera	0	86
actual	first	Spring	Lepidoptera	2	86
actual	first	Spring	Nematocera	30	86
actual	first	Spring	Other_Hymenoptera	1	86
actual	first	Spring	Other_prey	0	86
actual	first	Spring	Sternorrhyncha	29	86
actual	first	Summer	Araneae	2	47
actual	first	Summer	Auchenorrhyncha	8	47
actual	first	Summer	Brachycera	14	47
actual	first	Summer	Coleoptera	0	47
actual	first	Summer	Formicidae	3	47
actual	first	Summer	Heteroptera	2	47
actual	first	Summer	Lepidoptera	0	47
actual	first	Summer	Nematocera	7	47
actual	first	Summer	Other_Hymenoptera	1	47
actual	first	Summer	Other_prey	1	47
actual	first	Summer	Sternorrhyncha	9	47
actual	second	Fall	Araneae	1	51
actual	second	Fall	Auchenorrhyncha	4	51
actual	second	Fall	Brachycera	7	51
actual	second	Fall	Coleoptera	0	51
actual	second	Fall	Formicidae	5	51
actual	second	Fall	Heteroptera	5	51
actual	second	Fall	Lepidoptera	0	51
actual	second	Fall	Nematocera	7	51
actual	second	Fall	Other_Hymenoptera	3	51
actual	second	Fall	Other_prey	0	51
actual	second	Fall	Sternorrhyncha	19	51
actual	second	Spring	Araneae	3	45
actual	second	Spring	Auchenorrhyncha	1	45
actual	second	Spring	Brachycera	12	45
actual	second	Spring	Coleoptera	9	45
actual	second	Spring	Formicidae	4	45
actual	second	Spring	Heteroptera	0	45
actual	second	Spring	Lepidoptera	0	45
actual	second	Spring	Nematocera	9	45
actual	second	Spring	Other_Hymenoptera	1	45
actual	second	Spring	Other_prey	2	45
actual	second	Spring	Sternorrhyncha	4	45
actual	second	Summer	Araneae	13	202
actual	second	Summer	Auchenorrhyncha	3	202
actual	second	Summer	Brachycera	49	202
actual	second	Summer	Coleoptera	3	202
actual	second	Summer	Formicidae	26	202
actual	second	Summer	Heteroptera	4	202
actual	second	Summer	Lepidoptera	5	202
actual	second	Summer	Nematocera	32	202
actual	second	Summer	Other_Hymenoptera	8	202
actual	second	Summer	Other_prey	9	202
actual	second	Summer	Sternorrhyncha	50	202
potential	first	Fall	Araneae	65	815
potential	first	Fall	Auchenorrhyncha	318	815
potential	first	Fall	Brachycera	58	815
potential	first	Fall	Coleoptera	62	815
potential	first	Fall	Formicidae	3	815
potential	first	Fall	Heteroptera	42	815
potential	first	Fall	Lepidoptera	2	815
potential	first	Fall	Nematocera	198	815
potential	first	Fall	Other_Hymenoptera	22	815
potential	first	Fall	Other_prey	26	815
potential	first	Fall	Sternorrhyncha	19	815
potential	first	Spring	Araneae	59	1326
potential	first	Spring	Auchenorrhyncha	12	1326
potential	first	Spring	Brachycera	61	1326
potential	first	Spring	Coleoptera	461	1326
potential	first	Spring	Formicidae	405	1326
potential	first	Spring	Heteroptera	20	1326
potential	first	Spring	Lepidoptera	3	1326
potential	first	Spring	Nematocera	97	1326
potential	first	Spring	Other_Hymenoptera	17	1326
potential	first	Spring	Other_prey	16	1326
potential	first	Spring	Sternorrhyncha	175	1326
potential	first	Summer	Araneae	86	6788
potential	first	Summer	Auchenorrhyncha	184	6788
potential	first	Summer	Brachycera	171	6788
potential	first	Summer	Coleoptera	190	6788
potential	first	Summer	Formicidae	120	6788
potential	first	Summer	Heteroptera	40	6788
potential	first	Summer	Lepidoptera	26	6788
potential	first	Summer	Nematocera	73	6788
potential	first	Summer	Other_Hymenoptera	12	6788
potential	first	Summer	Other_prey	33	6788
potential	first	Summer	Sternorrhyncha	5853	6788
potential	second	Fall	Araneae	45	621
potential	second	Fall	Auchenorrhyncha	176	621
potential	second	Fall	Brachycera	16	621
potential	second	Fall	Coleoptera	40	621
potential	second	Fall	Formicidae	5	621
potential	second	Fall	Heteroptera	120	621
potential	second	Fall	Lepidoptera	9	621
potential	second	Fall	Nematocera	124	621
potential	second	Fall	Other_Hymenoptera	11	621
potential	second	Fall	Other_prey	19	621
potential	second	Fall	Sternorrhyncha	56	621
potential	second	Spring	Araneae	61	1099
potential	second	Spring	Auchenorrhyncha	23	1099
potential	second	Spring	Brachycera	130	1099
potential	second	Spring	Coleoptera	622	1099
potential	second	Spring	Formicidae	26	1099
potential	second	Spring	Heteroptera	10	1099
potential	second	Spring	Lepidoptera	5	1099
potential	second	Spring	Nematocera	180	1099
potential	second	Spring	Other_Hymenoptera	9	1099
potential	second	Spring	Other_prey	24	1099
potential	second	Spring	Sternorrhyncha	9	1099
potential	second	Summer	Araneae	80	772
potential	second	Summer	Auchenorrhyncha	164	772
potential	second	Summer	Brachycera	48	772
potential	second	Summer	Coleoptera	41	772
potential	second	Summer	Formicidae	88	772
potential	second	Summer	Heteroptera	81	772
potential	second	Summer	Lepidoptera	13	772
potential	second	Summer	Nematocera	55	772
potential	second	Summer	Other_Hymenoptera	18	772
potential	second	Summer	Other_prey	20	772
potential	second	Summer	Sternorrhyncha	164	772

## Sheet: act_pot_economic
Prey_type	Year	Season	Prey_function	Abund	Seasonal_sum_abund
actual	first	Spring	natural_enemy	2	86
actual	first	Spring	neutral	48	86
actual	first	Spring	pest	36	86
actual	first	Summer	natural_enemy	7	47
actual	first	Summer	neutral	25	47
actual	first	Summer	pest	15	47
actual	first	Fall	natural_enemy	5	21
actual	first	Fall	neutral	7	21
actual	first	Fall	pest	9	21
actual	second	Spring	natural_enemy	6	45
actual	second	Spring	neutral	26	45
actual	second	Spring	pest	13	45
actual	second	Summer	natural_enemy	30	202
actual	second	Summer	neutral	115	202
actual	second	Summer	pest	57	202
actual	second	Fall	natural_enemy	8	51
actual	second	Fall	neutral	21	51
actual	second	Fall	pest	22	51
potential	first	Spring	natural_enemy	109	1326
potential	first	Spring	neutral	605	1326
potential	first	Spring	pest	612	1326
potential	first	Summer	natural_enemy	333	6788
potential	first	Summer	neutral	401	6788
potential	first	Summer	pest	6054	6788
potential	first	Fall	natural_enemy	157	815
potential	first	Fall	neutral	307	815
potential	first	Fall	pest	351	815
potential	second	Spring	natural_enemy	111	1099
potential	second	Spring	neutral	381	1099
potential	second	Spring	pest	607	1099
potential	second	Summer	natural_enemy	131	772
potential	second	Summer	neutral	248	772
potential	second	Summer	pest	393	772
potential	second	Fall	natural_enemy	104	621
potential	second	Fall	neutral	170	621
potential	second	Fall	pest	347	621
