# Supplementary material for: Beyond polyphagy and opportunism: natural prey of hunting spiders in the canopy of apple trees
Source: PeerJ journal article supplement (doi:10.7717/peerj.9334), 2020-06-19
Supplement: Supplemental_Tables.pdf [file Supplemental_Tables.pdf]

**Mezőfi et al., 2020: Beyond polyphagy and opportunism: natural prey of hunting spiders in the canopy of apple trees.**

Supplemental tables

**Table S1. Species composition and abundance of hunting spiders collected in the canopy of apple trees in organic apple orchards**

| Taxa                                          | All spiders collected with prey (from 2013 to 2019) |              | Újfehértó, 2016/17, spiders collected with prey |              | Újfehértó, 2016/17, suction sampled spiders |              |
|-----------------------------------------------|-----------------------------------------------------|--------------|-------------------------------------------------|--------------|---------------------------------------------|--------------|
|                                               | Abundance                                           | %            | Abundance                                       | %            | Abundance                                   | %            |
| <b>Anyphaenidae</b>                           | <b>0</b>                                            | <b>0.0%</b>  | <b>0</b>                                        | <b>0.0%</b>  | <b>1</b>                                    | <b>0.3%</b>  |
| <i>Anyphaena accentuata</i>                   | 0                                                   | 0.0%         | 0                                               | 0.0%         | 1                                           | 0.3%         |
| <b>Cheiracanthiidae</b>                       | <b>20</b>                                           | <b>2.3%</b>  | <b>3</b>                                        | <b>0.7%</b>  | <b>8</b>                                    | <b>2.6%</b>  |
| <i>Cheiracanthium</i> cf. <i>virescens</i>    | 1                                                   | 0.1%         | 0                                               | 0.0%         | 0                                           | 0.0%         |
| <i>Cheiracanthium</i> sp.                     | 19                                                  | 2.2%         | 3                                               | 0.7%         | 8                                           | 2.6%         |
| <b>Clubionidae</b>                            | <b>86</b>                                           | <b>9.8%</b>  | <b>57</b>                                       | <b>12.6%</b> | <b>28</b>                                   | <b>9.2%</b>  |
| <i>Clubiona frutetorum</i>                    | 10                                                  | 1.1%         | 5                                               | 1.1%         | 4                                           | 1.3%         |
| <i>Clubiona</i> sp.                           | 76                                                  | 8.7%         | 52                                              | 11.5%        | 23                                          | 7.5%         |
| <i>Porrhoclubiona leucaspis</i>               | 0                                                   | 0.0%         | 0                                               | 0.0%         | 1                                           | 0.3%         |
| <b>Oxyopidae</b>                              | <b>17</b>                                           | <b>1.9%</b>  | <b>5</b>                                        | <b>1.1%</b>  | <b>1</b>                                    | <b>0.3%</b>  |
| <i>Oxyopes ramosus</i>                        | 14                                                  | 1.6%         | 4                                               | 0.9%         | 0                                           | 0.0%         |
| <i>Oxyopes</i> sp.                            | 3                                                   | 0.3%         | 1                                               | 0.2%         | 1                                           | 0.3%         |
| <b>Philodromidae</b>                          | <b>248</b>                                          | <b>28.2%</b> | <b>76</b>                                       | <b>16.8%</b> | <b>109</b>                                  | <b>35.7%</b> |
| <i>Philodromus cespitum</i>                   | 233                                                 | 26.5%        | 73                                              | 16.2%        | 9                                           | 3.0%         |
| <i>Philodromus longipalpis</i>                | 4                                                   | 0.5%         | 0                                               | 0.0%         | 0                                           | 0.0%         |
| <i>Philodromus margaritatus</i>               | 1                                                   | 0.1%         | 0                                               | 0.0%         | 0                                           | 0.0%         |
| <i>Philodromus rufus</i>                      | 3                                                   | 0.3%         | 2                                               | 0.4%         | 0                                           | 0.0%         |
| <i>Philodromus</i> sp. ( <i>aureolus</i> gr.) | 5                                                   | 0.6%         | 0                                               | 0.0%         | 100                                         | 32.8%        |
| <i>Tibellus oblongus</i>                      | 2                                                   | 0.2%         | 1                                               | 0.2%         | 0                                           | 0.0%         |
| <b>Pisauridae</b>                             | <b>2</b>                                            | <b>0.2%</b>  | <b>1</b>                                        | <b>0.2%</b>  | <b>1</b>                                    | <b>0.3%</b>  |
| <i>Pisaura mirabilis</i>                      | 2                                                   | 0.2%         | 1                                               | 0.2%         | 1                                           | 0.3%         |
| <b>Salticidae</b>                             | <b>363</b>                                          | <b>41.3%</b> | <b>240</b>                                      | <b>53.1%</b> | <b>105</b>                                  | <b>34.4%</b> |
| <i>Ballus chalybeius</i>                      | 0                                                   | 0.0%         | 0                                               | 0.0%         | 1                                           | 0.3%         |
| <i>Carrhotus xanthogramma</i>                 | 303                                                 | 34.5%        | 214                                             | 47.3%        | 74                                          | 24.3%        |
| <i>Evarcha arcuata</i>                        | 2                                                   | 0.2%         | 1                                               | 0.2%         | 0                                           | 0.0%         |
| <i>Evarcha falcata</i>                        | 2                                                   | 0.2%         | 1                                               | 0.2%         | 0                                           | 0.0%         |
| <i>Heliophanus auratus</i>                    | 11                                                  | 1.3%         | 3                                               | 0.7%         | 4                                           | 1.3%         |
| <i>Heliophanus cupreus</i>                    | 17                                                  | 1.9%         | 5                                               | 1.1%         | 14                                          | 4.6%         |
| <i>Heliophanus</i> sp.                        | 1                                                   | 0.1%         | 0                                               | 0.0%         | 0                                           | 0.0%         |
| <i>Macaroeris nidicolens</i>                  | 2                                                   | 0.2%         | 0                                               | 0.0%         | 0                                           | 0.0%         |
| <i>Marpissa muscosa</i>                       | 2                                                   | 0.2%         | 0                                               | 0.0%         | 0                                           | 0.0%         |
| <i>Pseudicius encarpatus</i>                  | 7                                                   | 0.8%         | 4                                               | 0.9%         | 4                                           | 1.3%         |
| Salticidae sp.                                | 0                                                   | 0.0%         | 0                                               | 0.0%         | 1                                           | 0.3%         |
| <i>Salticus scenicus</i>                      | 15                                                  | 1.7%         | 12                                              | 2.7%         | 5                                           | 1.6%         |
| <i>Salticus</i> sp.                           | 1                                                   | 0.1%         | 0                                               | 0.0%         | 2                                           | 0.7%         |
| <b>Thomisidae</b>                             | <b>142</b>                                          | <b>16.2%</b> | <b>70</b>                                       | <b>15.5%</b> | <b>52</b>                                   | <b>17.0%</b> |
| <i>Ebrechtella tricuspoidata</i>              | 53                                                  | 6.0%         | 24                                              | 5.3%         | 16                                          | 5.2%         |
| <i>Misumena vatia</i>                         | 24                                                  | 2.7%         | 15                                              | 3.3%         | 11                                          | 3.6%         |
| <i>Runcinia grammica</i>                      | 1                                                   | 0.1%         | 0                                               | 0.0%         | 0                                           | 0.0%         |
| <i>Synema globosum</i>                        | 4                                                   | 0.5%         | 1                                               | 0.2%         | 0                                           | 0.0%         |
| <i>Tmarus piger</i>                           | 11                                                  | 1.3%         | 8                                               | 1.8%         | 5                                           | 1.6%         |
| <i>Xysticus acerbus</i>                       | 3                                                   | 0.3%         | 1                                               | 0.2%         | 0                                           | 0.0%         |
| <i>Xysticus cristatus</i>                     | 1                                                   | 0.1%         | 1                                               | 0.2%         | 0                                           | 0.0%         |
| <i>Xysticus kochi</i>                         | 8                                                   | 0.9%         | 4                                               | 0.9%         | 0                                           | 0.0%         |
| <i>Xysticus lanio</i>                         | 2                                                   | 0.2%         | 2                                               | 0.4%         | 0                                           | 0.0%         |
| <i>Xysticus</i> sp.                           | 18                                                  | 2.1%         | 7                                               | 1.5%         | 18                                          | 5.9%         |
| <i>Xysticus (Spiracme) striatipes</i>         | 8                                                   | 0.9%         | 3                                               | 0.7%         | 1                                           | 0.3%         |
| <i>Xysticus ulmi</i>                          | 9                                                   | 1.0%         | 4                                               | 0.9%         | 1                                           | 0.3%         |
| Sum                                           | 878                                                 | 100.0%       | 452                                             | 100.0%       | 305                                         | 100.0%       |

**Table S2. Taxonomic composition of the most abundant arboreal hunting spider groups collected in organic apple orchards**

| Taxa                   | All spiders collected with prey (from 2013 to 2019) |       | Újfehértó, 2016/17, spiders collected with prey |       | Újfehértó, 2016/17, suction sampled spiders |       |
|------------------------|-----------------------------------------------------|-------|-------------------------------------------------|-------|---------------------------------------------|-------|
|                        | Abundance                                           | %*    | Abundance                                       | %*    | Abundance                                   | %*    |
| <i>C. xanthogramma</i> | 303                                                 | 34.5% | 214                                             | 47.4% | 74                                          | 24.3% |
| Other salticids        | 60                                                  | 6.8%  | 26                                              | 5.8%  | 31                                          | 10.2% |
| <i>Ph. cespitum</i>    | 233                                                 | 26.5% | 73                                              | 16.2% | 109                                         | 35.7% |
| <i>E. tricuspidata</i> | 53                                                  | 6.0%  | 24                                              | 5.3%  | 16                                          | 5.3%  |
| <i>Xysticus</i> spp.   | 49                                                  | 5.6%  | 22                                              | 4.9%  | 20                                          | 6.6%  |
| <i>Clubiona</i> spp.   | 86                                                  | 9.8%  | 57                                              | 12.6% | 28                                          | 9.2%  |
| Sum                    | 784                                                 | 89.3% | 416                                             | 92.0% | 278                                         | 91.2% |

\*Relative to the whole arboreal hunting spider assemblage

Table S3. Number of hunting spiders collected monthly by spider groups

| Month/Taxa                                             | <i>C. xanthogramma</i> | Other salticids | <i>Ph. cespitum</i> | <i>E. tricuspidata</i> | <i>Xysticus</i> spp. | <i>Clubiona</i> spp.* |
|--------------------------------------------------------|------------------------|-----------------|---------------------|------------------------|----------------------|-----------------------|
| <b>All collected spiders with prey</b>                 |                        |                 |                     |                        |                      |                       |
| April                                                  | 9                      | 9               | 67                  | 18                     | 13                   | 15                    |
| May                                                    | 36                     | 22              | 106                 | 11                     | 4                    | 14                    |
| June                                                   | 25                     | 7               | 37                  | 4                      | 4                    | 4                     |
| July                                                   | 126                    | 9               | 16                  | 5                      | 15                   | 5                     |
| August                                                 | 38                     | 5               | 4                   | 7                      | 5                    | 9                     |
| September                                              | 52                     | 4               | 2                   | 8                      | 8                    | 26                    |
| October                                                | 17                     | 4               | 1                   | 0                      | 0                    | 12                    |
| <b>Újfehértó, 2016/17, collected spiders with prey</b> |                        |                 |                     |                        |                      |                       |
| April                                                  | 4                      | 4               | 28                  | 8                      | 7                    | 9                     |
| May                                                    | 18                     | 6               | 17                  | 6                      | 1                    | 4                     |
| June                                                   | 23                     | 3               | 11                  | 2                      | 1                    | 2                     |
| July                                                   | 110                    | 6               | 14                  | 4                      | 8                    | 5                     |
| August                                                 | 27                     | 2               | 1                   | 3                      | 5                    | 7                     |
| September                                              | 15                     | 1               | 1                   | 1                      | 0                    | 17                    |
| October                                                | 17                     | 4               | 1                   | 0                      | 0                    | 12                    |
| <b>Újfehértó, 2016/17, suction sampled spiders</b>     |                        |                 |                     |                        |                      |                       |
| April                                                  | 3                      | 1               | 39                  | 5                      | 0                    | 0                     |
| May                                                    | 3                      | 10              | 30                  | 0                      | 0                    | 1                     |
| June                                                   | 5                      | 3               | 19                  | 0                      | 3                    | 4                     |
| July                                                   | 23                     | 5               | 4                   | 0                      | 11                   | 3                     |
| August                                                 | 16                     | 9               | 6                   | 7                      | 4                    | 10                    |
| September                                              | 13                     | 2               | 2                   | 2                      | 1                    | 8                     |
| October                                                | 11                     | 1               | 9                   | 2                      | 1                    | 2                     |

Two matrices were compared with Mantel test

\*One record collected in March is not indicated in this Table.

**Table S4. Number of the actual and potential prey items of arboreal hunting spiders by prey groups and months**

| Month/Taxa                                                  | Araneae | Coleoptera | Lepidoptera | Formicidae <sup>a</sup> | Other Hymenoptera | Brachycera | Nematocera | Auchenorrhyncha | Heteroptera | Sternorrhyncha <sup>b</sup> | Other <sup>c</sup> |
|-------------------------------------------------------------|---------|------------|-------------|-------------------------|-------------------|------------|------------|-----------------|-------------|-----------------------------|--------------------|
| <b>All collected spiders - Actual prey</b>                  |         |            |             |                         |                   |            |            |                 |             |                             |                    |
| April                                                       | 6       | 8          | 4           | 6                       | 1                 | 15         | 58         | 0               | 4           | 42                          | 3                  |
| May                                                         | 14      | 23         | 1           | 7                       | 2                 | 40         | 80         | 1               | 2           | 46                          | 2                  |
| June                                                        | 1       | 1          | 0           | 6                       | 0                 | 34         | 12         | 2               | 2           | 35                          | 2                  |
| July                                                        | 15      | 3          | 4           | 33                      | 8                 | 36         | 26         | 8               | 4           | 37                          | 12                 |
| August                                                      | 6       | 1          | 2           | 1                       | 1                 | 26         | 8          | 4               | 14          | 7                           | 0                  |
| September                                                   | 14      | 3          | 4           | 11                      | 8                 | 15         | 14         | 13              | 14          | 20                          | 4                  |
| October                                                     | 1       | 0          | 0           | 4                       | 0                 | 3          | 7          | 2               | 2           | 20                          | 0                  |
| <b>Újfehértó, 2016/17, - Actual prey</b>                    |         |            |             |                         |                   |            |            |                 |             |                             |                    |
| April                                                       | 2       | 5          | 2           | 3                       | 1                 | 4          | 26         | 0               | 0           | 24                          | 1                  |
| May                                                         | 3       | 10         | 0           | 6                       | 1                 | 18         | 13         | 1               | 0           | 7                           | 1                  |
| June                                                        | 0       | 1          | 0           | 3                       | 0                 | 12         | 8          | 0               | 0           | 24                          | 0                  |
| July                                                        | 10      | 1          | 3           | 26                      | 8                 | 32         | 25         | 7               | 2           | 30                          | 10                 |
| August                                                      | 5       | 1          | 2           | 0                       | 1                 | 19         | 6          | 4               | 4           | 5                           | 0                  |
| September                                                   | 2       | 0          | 2           | 2                       | 4                 | 6          | 8          | 4               | 4           | 4                           | 0                  |
| October                                                     | 1       | 0          | 0           | 3                       | 0                 | 2          | 6          | 2               | 2           | 20                          | 0                  |
| <b>Újfehértó, 2016/17, suction sampled - Potential prey</b> |         |            |             |                         |                   |            |            |                 |             |                             |                    |
| April                                                       | 61      | 85         | 4           | 6                       | 7                 | 50         | 134        | 25              | 16          | 14                          | 29                 |
| May                                                         | 59      | 998        | 4           | 425                     | 19                | 141        | 143        | 10              | 14          | 170                         | 11                 |
| June                                                        | 48      | 149        | 18          | 142                     | 9                 | 162        | 39         | 17              | 22          | 5996                        | 25                 |
| July                                                        | 62      | 52         | 8           | 42                      | 15                | 39         | 75         | 136             | 37          | 16                          | 15                 |
| August                                                      | 56      | 30         | 13          | 24                      | 6                 | 18         | 14         | 195             | 62          | 5                           | 13                 |
| September                                                   | 45      | 53         | 8           | 5                       | 12                | 47         | 62         | 248             | 137         | 5                           | 17                 |
| October                                                     | 65      | 49         | 3           | 3                       | 21                | 27         | 260        | 246             | 25          | 70                          | 28                 |

Two matrices were compared with Mantel test

<sup>a</sup>One record collected in March is not indicated in this Table.

<sup>b</sup>Two records collected in March is not indicated in this Table.

<sup>c</sup>Acari, Ephemeroptera, Neuroptera, Psocoptera, Thysanoptera, Trichoptera, while in case of Potential prey, Orthoptera, Raphidioptera and Indet were also included.

Table S5. Prey items of the six most abundant arboreal hunting spider groups

| Prey/Predator                                                   | <i>C.<br/>xanthogramma</i> | Other salticids | <i>Ph. cespitum</i> | <i>E. tricuspidata</i> | <i>Xysticus</i> spp. | <i>Clubiona</i> spp. |
|-----------------------------------------------------------------|----------------------------|-----------------|---------------------|------------------------|----------------------|----------------------|
| <b>Újfehértó, 2016-2017</b>                                     |                            |                 |                     |                        |                      |                      |
| Araneae                                                         | 14                         | 2               | 2                   | 1                      | 1                    | 2                    |
| Coleoptera                                                      | 6                          | 1               | 1                   | 2                      | 5                    | 0                    |
| Lepidoptera                                                     | 4                          | 0               | 0                   | 1                      | 0                    | 3                    |
| Formicidae                                                      | 22                         | 0               | 0                   | 0                      | 8                    | 3                    |
| Other Hymenoptera                                               | 6                          | 1               | 1                   | 3                      | 0                    | 1                    |
| Brachycera                                                      | 60                         | 7               | 8                   | 5                      | 3                    | 5                    |
| Nematocera                                                      | 26                         | 7               | 30                  | 8                      | 1                    | 13                   |
| Auchenorrhyncha                                                 | 9                          | 0               | 4                   | 0                      | 1                    | 4                    |
| Heteroptera                                                     | 6                          | 0               | 1                   | 0                      | 3                    | 2                    |
| Sternorrhyncha                                                  | 53                         | 8               | 22                  | 4                      | 0                    | 24                   |
| Other prey*                                                     | 8                          | 0               | 4                   | 0                      | 0                    | 0                    |
| <b>All sites and sampling dates except 2016-2017, Újfehértó</b> |                            |                 |                     |                        |                      |                      |
| Araneae                                                         | 14                         | 4               | 8                   | 1                      | 1                    | 3                    |
| Coleoptera                                                      | 5                          | 1               | 0                   | 1                      | 8                    | 0                    |
| Lepidoptera                                                     | 0                          | 1               | 0                   | 1                      | 0                    | 1                    |
| Formicidae                                                      | 3                          | 0               | 0                   | 1                      | 12                   | 0                    |
| Other Hymenoptera                                               | 3                          | 2               | 0                   | 0                      | 0                    | 0                    |
| Brachycera                                                      | 16                         | 6               | 28                  | 6                      | 0                    | 8                    |
| Nematocera                                                      | 10                         | 3               | 75                  | 9                      | 3                    | 4                    |
| Auchenorrhyncha                                                 | 6                          | 1               | 1                   | 0                      | 0                    | 1                    |
| Heteroptera                                                     | 9                          | 4               | 3                   | 6                      | 2                    | 1                    |
| Sternorrhyncha                                                  | 17                         | 11              | 42                  | 4                      | 1                    | 11                   |
| Other prey*                                                     | 6                          | 1               | 3                   | 0                      | 0                    | 0                    |

Two matrices were compared with Mantel test

\*Acari, Ephemeroptera, Neuroptera, Psocoptera, Thysanoptera, Trichoptera

**Table S6. Raw data of the trophic web (Fig. 5 based on abundance data).**

Taxonomic and economic composition of natural prey of hunting spider groups for all sites and years

| Prey/Predator     | <i>C. xanthogramma</i> |       | Other salticids |       | <i>Ph. cespitum</i> |       | <i>E. tricuspidata</i> |       | <i>Xysticus</i> spp. |       | <i>Clubiona</i> spp. |       |
|-------------------|------------------------|-------|-----------------|-------|---------------------|-------|------------------------|-------|----------------------|-------|----------------------|-------|
| Acari             | 0                      | 0.0%  | 0               | 0.0%  | 3                   | 1.3%  | 0                      | 0.0%  | 0                    | 0.0%  | 0                    | 0.0%  |
| Araneae           | 28                     | 9.2%  | 6               | 10.0% | 10                  | 4.3%  | 2                      | 3.8%  | 2                    | 4.1%  | 5                    | 5.8%  |
| Coleoptera        | 11                     | 3.6%  | 2               | 3.3%  | 1                   | 0.4%  | 3                      | 5.7%  | 13                   | 26.5% | 0                    | 0.0%  |
| Lepidoptera       | 4                      | 1.3%  | 1               | 1.7%  | 0                   | 0.0%  | 2                      | 3.8%  | 0                    | 0.0%  | 4                    | 4.7%  |
| Formicidae        | 25                     | 8.3%  | 0               | 0.0%  | 0                   | 0.0%  | 1                      | 1.9%  | 20                   | 40.8% | 3                    | 3.5%  |
| Other Hymenoptera | 9                      | 3.0%  | 3               | 5.0%  | 1                   | 0.4%  | 3                      | 5.7%  | 0                    | 0.0%  | 1                    | 1.2%  |
| Brachycera        | 76                     | 25.1% | 13              | 21.7% | 36                  | 15.5% | 11                     | 20.8% | 3                    | 6.1%  | 13                   | 15.1% |
| Nematocera        | 36                     | 11.9% | 10              | 16.7% | 105                 | 45.1% | 17                     | 32.1% | 4                    | 8.2%  | 17                   | 19.8% |
| Auchenorrhyncha   | 15                     | 5.0%  | 1               | 1.7%  | 5                   | 2.1%  | 0                      | 0.0%  | 1                    | 2.0%  | 5                    | 5.8%  |
| Heteroptera       | 15                     | 5.0%  | 4               | 6.7%  | 4                   | 1.7%  | 6                      | 11.3% | 5                    | 10.2% | 3                    | 3.5%  |
| Sternorrhyncha    | 70                     | 23.1% | 19              | 31.7% | 64                  | 27.5% | 8                      | 15.1% | 1                    | 2.0%  | 35                   | 40.7% |
| Ephemeroptera     | 2                      | 0.7%  | 0               | 0.0%  | 0                   | 0.0%  | 0                      | 0.0%  | 0                    | 0.0%  | 0                    | 0.0%  |
| Neuroptera        | 4                      | 1.3%  | 1               | 1.7%  | 3                   | 1.3%  | 0                      | 0.0%  | 0                    | 0.0%  | 0                    | 0.0%  |
| Psocoptera        | 5                      | 1.7%  | 0               | 0.0%  | 0                   | 0.0%  | 0                      | 0.0%  | 0                    | 0.0%  | 0                    | 0.0%  |
| Thysanoptera      | 2                      | 0.7%  | 0               | 0.0%  | 1                   | 0.4%  | 0                      | 0.0%  | 0                    | 0.0%  | 0                    | 0.0%  |
| Trichoptera       | 1                      | 0.3%  | 0               | 0.0%  | 0                   | 0.0%  | 0                      | 0.0%  | 0                    | 0.0%  | 0                    | 0.0%  |
| Natural enemy     | 58                     | 19.1% | 12              | 20.0% | 21                  | 9.0%  | 10                     | 18.9% | 6                    | 12.2% | 9                    | 10.5% |
| Neutral           | 149                    | 49.2% | 27              | 45.0% | 143                 | 61.4% | 31                     | 58.5% | 31                   | 63.3% | 34                   | 39.5% |
| Pest              | 96                     | 31.7% | 21              | 35.0% | 69                  | 29.6% | 12                     | 22.6% | 12                   | 24.5% | 43                   | 50.0% |
| Sum:              | 303                    | 100%  | 60              | 100%  | 233                 | 100%  | 53                     | 100%  | 49                   | 100%  | 86                   | 100%  |

**Table S7. Taxonomic composition of actual and potential prey items of arboreal hunting spiders collected in apple orchards**

| Taxa              | All collected spiders<br>- Actual prey |               | Újfehértó, 2016/17,<br>- Actual prey |               | Újfehértó, 2016/17,<br>suction sampled -<br>Potential prey |               |
|-------------------|----------------------------------------|---------------|--------------------------------------|---------------|------------------------------------------------------------|---------------|
|                   | Abundance                              | %             | Abundance                            | %             | Abundance                                                  | %             |
| Acari             | 3                                      | 0.3%          | 1                                    | 0.2%          | 14                                                         | 0.1%          |
| Araneae           | 57                                     | 6.5%          | 23                                   | 5.1%          | 396                                                        | 3.5%          |
| Coleoptera        | 39                                     | 4.4%          | 18                                   | 4.0%          | 1416                                                       | 12.4%         |
| Lepidoptera       | 15                                     | 1.7%          | 9                                    | 2.0%          | 58                                                         | 0.5%          |
| Formicidae        | 69                                     | 7.9%          | 44                                   | 9.7%          | 647                                                        | 5.7%          |
| Other Hymenoptera | 20                                     | 2.3%          | 15                                   | 3.3%          | 89                                                         | 0.8%          |
| Brachycera        | 169                                    | 19.2%         | 93                                   | 20.6%         | 484                                                        | 4.2%          |
| Nematocera        | 205                                    | 23.3%         | 92                                   | 20.4%         | 727                                                        | 6.4%          |
| Auchenorrhyncha   | 30                                     | 3.4%          | 18                                   | 4.0%          | 877                                                        | 7.7%          |
| Heteroptera       | 42                                     | 4.8%          | 12                                   | 2.7%          | 313                                                        | 2.7%          |
| Sternorrhyncha    | 209                                    | 23.8%         | 116                                  | 25.7%         | 6276                                                       | 55.0%         |
| Ephemeroptera     | 3                                      | 0.3%          | 2                                    | 0.4%          | 1                                                          | 0.0%          |
| Neuroptera        | 8                                      | 0.9%          | 5                                    | 1.1%          | 92                                                         | 0.8%          |
| Psocoptera        | 5                                      | 0.6%          | 2                                    | 0.4%          | 15                                                         | 0.1%          |
| Thysanoptera      | 3                                      | 0.3%          | 2                                    | 0.4%          | 2                                                          | 0.0%          |
| Trichoptera       | 1                                      | 0.1%          | 0                                    | 0.0%          | 1                                                          | 0.0%          |
| Other*            | 0                                      | 0.0%          | 0                                    | 0.0%          | 13                                                         | 0.1%          |
| <b>Sum</b>        | <b>878</b>                             | <b>100.0%</b> | <b>452</b>                           | <b>100.0%</b> | <b>11421</b>                                               | <b>100.0%</b> |

\*Orthoptera, Raphidioptera, Indet

**Table S8. Taxonomic composition of actual prey items of arboreal hunting spiders collected in apple orchards – pests.** All sites and years are included.

| Taxa                   | Abundance  | %            | Example                                                                                          |
|------------------------|------------|--------------|--------------------------------------------------------------------------------------------------|
| <b>Auchenorrhyncha</b> | <b>18</b>  | <b>6.5%</b>  |                                                                                                  |
| Cicadellidae           | 2          | 0.7%         | <i>Empoasca</i> sp.                                                                              |
| Flatidae               | 16         | 5.8%         | <i>Metcalfa pruinosa</i>                                                                         |
| <b>Coleoptera</b>      | <b>30</b>  | <b>10.8%</b> |                                                                                                  |
| Cerambycidae           | 1          | 0.4%         | <i>Pogonocherus hispidus</i>                                                                     |
| Curculionidae          | 29         | 10.5%        | <i>Phyllobius betulinus</i> , <i>Ph. oblongus</i> , <i>Ph. virideaeris</i> , <i>Rhamphus</i> sp. |
| <b>Heteroptera</b>     | <b>6</b>   | <b>2.2%</b>  |                                                                                                  |
| Tingidae               | 6          | 2.2%         | <i>Stephanitis pyri</i>                                                                          |
| <b>Lepidoptera</b>     | <b>14</b>  | <b>5.1%</b>  |                                                                                                  |
| Arctiidae              | 1          | 0.4%         | <i>Hyphantria cunea</i>                                                                          |
| Gracillariidae         | 1          | 0.4%         | <i>Phyllonorycter blancardella</i>                                                               |
| Indet leaf miners      | 2          | 0.7%         |                                                                                                  |
| Sesiidae               | 1          | 0.4%         | <i>Synanthedon myopaeformis</i>                                                                  |
| Tortricidae            | 9          | 3.2%         | cf. <i>Recurvaria</i> sp.                                                                        |
| <b>Sternorrhyncha</b>  | <b>209</b> | <b>75.5%</b> |                                                                                                  |
| Aphididae              | 198        | 71.5%        | <i>Aphis pomi</i> , <i>Dysaphis devectora</i> , <i>D. plantaginea</i>                            |
| Psyllidae              | 11         | 4.0%         | <i>Cacopsylla mali</i> , <i>C. melanoneura</i>                                                   |
| Sum                    | 277        | 100.0%       |                                                                                                  |

**Table S9. Taxonomic composition of actual prey items of arboreal hunting spiders collected in apple orchards – natural enemies.** All sites and years are included.

| Taxa               | Abundance | %            | Example                                                                                                   |
|--------------------|-----------|--------------|-----------------------------------------------------------------------------------------------------------|
| <b>Acari</b>       | <b>2</b>  | <b>1.6%</b>  | Trombidiidae sp.                                                                                          |
| <b>Araneae</b>     | <b>57</b> | <b>44.5%</b> |                                                                                                           |
| Araneidae          | 5         | 3.9%         | <i>Cyclosa oculata</i> , <i>Mangora acalypha</i>                                                          |
| Cheiracanthiidae   | 1         | 0.8%         | <i>Cheiracanthium</i> sp.                                                                                 |
| Clubionidae        | 5         | 3.9%         | <i>Clubiona frutetorum</i>                                                                                |
| Linyphiidae        | 3         | 2.3%         | <i>Erigone dentipalpis</i> , <i>Gongylidiellum murcidum</i> , <i>Porrhomma microphthalmum</i>             |
| Lycosidae          | 1         | 0.8%         |                                                                                                           |
| Philodromidae      | 9         | 7.0%         | <i>Philodromus cespitum</i>                                                                               |
| Salticidae         | 13        | 10.2%        | <i>Carrhotus xanthogramma</i> , <i>Heliophanus auratus</i> , <i>H. cupreus</i> , <i>Salticus</i> sp.      |
| Theridiidae        | 5         | 3.9%         | <i>Dipoena melanogaster</i> , <i>Lasaeola prona</i> , <i>Theridion</i> sp.                                |
| Thomisidae         | 3         | 2.3%         | <i>Ebrechtella tricuspida</i> , <i>Ozyptila</i> sp., <i>Xysticus</i> sp.                                  |
| Indet              | 12        | 9.4%         |                                                                                                           |
| <b>Brachycera</b>  | <b>14</b> | <b>10.9%</b> |                                                                                                           |
| Syrphidae          | 14        | 10.9%        | <i>Episyrphus balteatus</i> , <i>Eupeodes corollae</i>                                                    |
| <b>Coleoptera</b>  | <b>4</b>  | <b>3.1%</b>  |                                                                                                           |
| Carabidae          | 1         | 0.8%         |                                                                                                           |
| Coccinellidae      | 2         | 1.6%         | <i>Adalia decempunctata</i> , <i>Stethorus</i> sp.                                                        |
| Staphylinidae      | 1         | 0.8%         |                                                                                                           |
| <b>Heteroptera</b> | <b>26</b> | <b>20.3%</b> |                                                                                                           |
| Anthocoridae       | 6         | 4.7%         | <i>Orius</i> sp.                                                                                          |
| Miridae            | 20        | 15.6%        | <i>Agnocoris</i> sp., <i>Campylomma verbasci</i> , <i>Deraeocoris ruber</i> , <i>Pilophorus perplexus</i> |
| <b>Neuroptera</b>  | <b>8</b>  | <b>6.3%</b>  | Chrysopidae sp., Hemerobiidae sp.                                                                         |
| <b>Hymenoptera</b> | <b>17</b> | <b>13.3%</b> | Hymenoptera Parasitica spp.                                                                               |
| Sum                | 128       | 100.0%       |                                                                                                           |

**Table S10. Ivlev's electivity indices based on the actual and potential prey of the arboreal hunting spider assemblage, Újfehértó, Hungary, 2016-2017.** Comparison of the proportion of each prey group in the actual and potential prey based on model contrasts.

| Taxa/Economic category  | Ivlev's index | $P^a$  |
|-------------------------|---------------|--------|
| Araneae                 | 0.0568        | 0.7185 |
| Coleoptera              | -0.5472       | 0.0003 |
| Lepidoptera             | 0.4897        | 0.0765 |
| Formicidae              | 0.2080        | 0.1415 |
| Other Hymenoptera       | 0.4986        | 0.0914 |
| Brachycera              | 0.5789        | 0.0023 |
| Nematocera              | 0.4018        | 0.0246 |
| Auchenorrhyncha         | -0.3143       | 0.0534 |
| Heteroptera             | -0.1067       | 0.2658 |
| Sternorrhyncha          | 0.0191        | 0.0814 |
| Other prey <sup>b</sup> | 0.0295        | 0.8313 |
| Natural enemy           | 0.0908        | 0.8941 |
| Neutral                 | 0.4084        | 0.0017 |
| Pest                    | -0.3050       | 0.0023 |

<sup>a</sup>GLMM-b contrasts

<sup>b</sup>Acari, Ephemeroptera, Neuroptera, Psocoptera, Thysanoptera, Trichoptera

**Table S11. Similarity (trophic niche overlap index) between the prey of the six hunting spider groups**

|                                                   | <i>C. xanthogramma</i> | Other salticids | <i>Ph. cespitum</i> | <i>E. tricuspidata</i> | <i>Xysticus</i> spp. |
|---------------------------------------------------|------------------------|-----------------|---------------------|------------------------|----------------------|
| Niche overlap based on prey taxonomic composition |                        |                 |                     |                        |                      |
| Other salticids                                   | 0.815                  | *               | *                   | *                      | *                    |
| <i>Ph. cespitum</i>                               | <b>0.612</b>           | <b>0.694</b>    | *                   | *                      | *                    |
| <i>E. tricuspidata</i>                            | <b>0.663</b>           | 0.730           | 0.690               | *                      | *                    |
| <i>Xysticus</i> spp.                              | <b>0.393</b>           | <b>0.321</b>    | <b>0.246</b>        | <b>0.379</b>           | *                    |
| <i>Clubiona</i> spp.                              | <b>0.703</b>           | 0.773           | <b>0.709</b>        | 0.641                  | <b>0.294</b>         |
| Niche overlap based on prey size                  |                        |                 |                     |                        |                      |
| Other salticids                                   | 0.887                  | *               | *                   | *                      | *                    |
| <i>Ph. cespitum</i>                               | 0.833                  | 0.840           | *                   | *                      | *                    |
| <i>E. tricuspidata</i>                            | 0.883                  | 0.832           | 0.858               | *                      | *                    |
| <i>Xysticus</i> spp.                              | 0.898                  | 0.806           | 0.764               | 0.893                  | *                    |
| <i>Clubiona</i> spp.                              | 0.800                  | 0.861           | 0.777               | 0.725                  | 0.719                |
| Overall niche overlap                             |                        |                 |                     |                        |                      |
| Other salticids                                   | 0.851                  | *               | *                   | *                      | *                    |
| <i>Ph. cespitum</i>                               | <b>0.722</b>           | <b>0.767</b>    | *                   | *                      | *                    |
| <i>E. tricuspidata</i>                            | <b>0.773</b>           | 0.781           | 0.774               | *                      | *                    |
| <i>Xysticus</i> spp.                              | <b>0.645</b>           | <b>0.563</b>    | <b>0.505</b>        | <b>0.636</b>           | *                    |
| <i>Clubiona</i> spp.                              | <b>0.751</b>           | 0.817           | <b>0.743</b>        | <b>0.683</b>           | <b>0.506</b>         |

0 index value means no overlap, whereas values close to 1 reflect similar resource utilization spectra. Species pairs occupying statistically different niches, as identified by null model tests, are indicated in bold (adjusted  $\alpha = 0.0033$ ).

Table S12. **Similarity (trophic niche overlap index) between the prey of the six hunting spider groups.**

*C. xanthogramma* and *Ph. cespitum* were split to juveniles and adults

|                                                   | <i>C. xanthogramma</i><br>juveniles | <i>C. xanthogramma</i><br>adults | Other salticids | <i>Ph. cespitum</i><br>juveniles | <i>Ph. cespitum</i><br>adults | <i>E. tricuspidata</i> | <i>Xysticus</i> spp. |
|---------------------------------------------------|-------------------------------------|----------------------------------|-----------------|----------------------------------|-------------------------------|------------------------|----------------------|
| Niche overlap based on prey taxonomic composition |                                     |                                  |                 |                                  |                               |                        |                      |
| <i>C. xanthogramma</i> adults                     | 0.784                               | *                                | *               | *                                | *                             | *                      | *                    |
| Other salticids                                   | 0.801                               | 0.783                            | *               | *                                | *                             | *                      | *                    |
| <i>Ph. cespitum</i> juveniles                     | <b>0.542</b>                        | <b>0.465</b>                     | <b>0.588</b>    | *                                | *                             | *                      | *                    |
| <i>Ph. cespitum</i> adults                        | 0.737                               | 0.702                            | 0.804           | <b>0.707</b>                     | *                             | *                      | *                    |
| <i>E. tricuspidata</i>                            | <b>0.637</b>                        | 0.655                            | 0.730           | <b>0.622</b>                     | 0.723                         | *                      | *                    |
| <i>Xysticus</i> spp.                              | <b>0.392</b>                        | <b>0.382</b>                     | <b>0.321</b>    | <b>0.216</b>                     | <b>0.255</b>                  | <b>0.379</b>           | *                    |
| <i>Clubiona</i> spp.                              | <b>0.707</b>                        | <b>0.647</b>                     | 0.773           | <b>0.604</b>                     | 0.788                         | 0.641                  | <b>0.294</b>         |
| Niche overlap based on prey size                  |                                     |                                  |                 |                                  |                               |                        |                      |
| <i>C. xanthogramma</i> adults                     | <b>0.661</b>                        | *                                | *               | *                                | *                             | *                      | *                    |
| Other salticids                                   | 0.912                               | <b>0.712</b>                     | *               | *                                | *                             | *                      | *                    |
| <i>Ph. cespitum</i> juveniles                     | 0.825                               | <b>0.629</b>                     | 0.814           | *                                | *                             | *                      | *                    |
| <i>Ph. cespitum</i> adults                        | 0.837                               | <b>0.738</b>                     | 0.852           | 0.855                            | *                             | *                      | *                    |
| <i>E. tricuspidata</i>                            | 0.806                               | 0.755                            | 0.832           | 0.805                            | 0.929                         | *                      | *                    |
| <i>Xysticus</i> spp.                              | 0.795                               | 0.785                            | 0.806           | <b>0.726</b>                     | 0.831                         | 0.893                  | *                    |
| <i>Clubiona</i> spp.                              | 0.888                               | <b>0.598</b>                     | 0.861           | 0.786                            | 0.762                         | 0.725                  | 0.719                |
| Overall niche overlap                             |                                     |                                  |                 |                                  |                               |                        |                      |
| <i>C. xanthogramma</i> adults                     | <b>0.723</b>                        | *                                | *               | *                                | *                             | *                      | *                    |
| Other salticids                                   | 0.856                               | <b>0.748</b>                     | *               | *                                | *                             | *                      | *                    |
| <i>Ph. cespitum</i> juveniles                     | <b>0.684</b>                        | <b>0.547</b>                     | <b>0.701</b>    | *                                | *                             | *                      | *                    |
| <i>Ph. cespitum</i> adults                        | <b>0.787</b>                        | <b>0.720</b>                     | 0.828           | <b>0.781</b>                     | *                             | *                      | *                    |
| <i>E. tricuspidata</i>                            | <b>0.722</b>                        | <b>0.705</b>                     | 0.781           | <b>0.714</b>                     | 0.826                         | *                      | *                    |
| <i>Xysticus</i> spp.                              | <b>0.594</b>                        | <b>0.584</b>                     | <b>0.563</b>    | <b>0.471</b>                     | <b>0.543</b>                  | <b>0.636</b>           | *                    |
| <i>Clubiona</i> spp.                              | 0.798                               | <b>0.623</b>                     | 0.817           | <b>0.695</b>                     | 0.775                         | <b>0.683</b>           | <b>0.506</b>         |

0 index value means no overlap, whereas values close to 1 reflect similar resource utilization spectra.

Species pairs occupying statistically different niches, as identified by null model tests, are indicated in bold (adjusted  $\alpha = 0.0018$ ).

Table S13. Coefficients of prey taxa vs. spider groups and the environmental predictors (fourth-corner model)

| Prey taxa / Predictors | <i>C. xanthogramma</i> | Other salticids | <i>Ph. cespitum</i> | <i>E. tricuspidata</i> | <i>Xysticus</i> spp. | <i>Clubiona</i> spp. | Spring | Summer | Fall   |
|------------------------|------------------------|-----------------|---------------------|------------------------|----------------------|----------------------|--------|--------|--------|
| Araneae                | 0.013                  | 0.007           | 0                   | -0.046                 | 0                    | 0                    | 0.069  | 0      | 0      |
| Coleoptera             | 0.030                  | 0               | -0.157              | 0                      | 0.265                | -0.094               | 0.321  | -0.030 | 0      |
| Lepidoptera            | -0.051                 | 0               | -0.095              | 0.046                  | 0                    | 0.087                | 0      | 0      | 0      |
| Formicidae             | 0.039                  | -0.113          | -0.188              | 0                      | 0.303                | 0                    | -0.029 | 0.121  | 0      |
| Other Hymenoptera      | 0                      | 0.069           | 0                   | 0.089                  | 0                    | 0                    | -0.035 | 0      | 0.095  |
| Brachycera             | 0                      | 0               | 0.029               | 0                      | -0.052               | 0                    | 0      | 0      | -0.117 |
| Nematocera             | -0.058                 | -0.039          | 0.115               | 0.021                  | -0.031               | 0                    | 0.152  | 0      | 0      |
| Auchenorrhyncha        | 0                      | 0               | 0.072               | -0.035                 | 0                    | 0.025                | -0.164 | 0      | 0.111  |
| Heteroptera            | -0.030                 | 0               | -0.005              | 0.076                  | 0.107                | -0.012               | -0.084 | 0      | 0.012  |
| Sternorrhyncha         | 0                      | 0.036           | 0.093               | -0.029                 | -0.136               | 0.089                | 0.046  | 0      | -0.015 |
| Other prey*            | 0.044                  | 0               | 0.102               | 0                      | 0                    | -0.032               | 0      | 0.040  | 0      |

\*Acari, Ephemeroptera, Neuroptera, Psocoptera, Thysanoptera, Trichoptera

Coefficients (in absolute value)  $\geq 0.03$  are highlighted in red (positive associations) or in blue (negative associations).

**Table S14. Trophic niche widths (Levins'  $B$ ), predator-prey size data and niche widths with respect to size ( $s^2$ ) for different life stages of *C. xanthogramma* and *Ph. cespitum***

|                                      | <i>C. xanthogramma</i><br>juveniles | <i>C. xanthogramma</i><br>adults | <i>Ph. cespitum</i><br>juveniles | <i>Ph. cespitum</i><br>adults |
|--------------------------------------|-------------------------------------|----------------------------------|----------------------------------|-------------------------------|
| $B$                                  | 5.851                               | 6.762                            | 2.509                            | 4.322                         |
| Spider prosoma width (mm), mean (SD) | 1.48 (0.30)                         | 2.48 (0.23)                      | 1.24 (0.24)                      | 1.87 (0.30)                   |
| Prey thorax width (mm), mean (SD)    | 0.97 (0.51)                         | 1.52 (0.69)                      | 0.81 (0.52)                      | 1.09 (0.65)                   |
| Thorax-prosoma ratio, mean (SD)      | 0.65 (0.27)                         | 0.61 (0.28)                      | 0.64 (0.38)                      | 0.58 (0.33)                   |
| $s^2$ absolute predator size         | 0.09 A                              | 0.05 A                           | 0.06 a                           | 0.09 b                        |
| $s^2$ absolute prey size             | 0.26 A                              | 0.46 B                           | 0.23 a                           | 0.40 b                        |
| $s^2$ prey-predator size ratio       | 0.07 A                              | 0.08 A                           | 0.15 a                           | 0.11 a                        |

Different capital letters indicate significant differences in *C. xanthogramma* and different lowercase letters indicate significant differences in *Ph. cespitum* at  $P < 0.05$  level.

Table S15. Natural prey of juveniles and adults (subadults + adults) of *Carrhotus xanthogramma* and *Philodromus cespitum*

|                   | <i>Carrhotus xanthogramma</i> |        |           |        | <i>Philodromus cespitum</i> |        |           |        |
|-------------------|-------------------------------|--------|-----------|--------|-----------------------------|--------|-----------|--------|
|                   | Abundance                     |        | %         |        | Abundance                   |        | %         |        |
|                   | Juveniles                     | Adults | Juveniles | Adults | Juveniles                   | Adults | Juveniles | Adults |
| Acari             | 0                             | 0      | 0.0%      | 0.0%   | 1                           | 2      | 0.8%      | 2.0%   |
| Araneae           | 17                            | 11     | 9.2%      | 9.6%   | 5                           | 5      | 3.8%      | 5.1%   |
| Coleoptera        | 1                             | 10     | 0.5%      | 8.8%   | 1                           | 0      | 0.8%      | 0.0%   |
| Lepidoptera       | 3                             | 1      | 1.6%      | 0.9%   | 0                           | 0      | 0.0%      | 0.0%   |
| Formicidae        | 22                            | 2      | 11.9%     | 1.8%   | 0                           | 0      | 0.0%      | 0.0%   |
| Other Hymenoptera | 4                             | 4      | 2.2%      | 3.5%   | 0                           | 1      | 0.0%      | 1.0%   |
| Brachycera        | 48                            | 28     | 25.9%     | 24.6%  | 13                          | 23     | 9.8%      | 23.5%  |
| Nematocera        | 25                            | 10     | 13.5%     | 8.8%   | 75                          | 28     | 56.4%     | 28.6%  |
| Auchenorrhyncha   | 4                             | 11     | 2.2%      | 9.6%   | 0                           | 5      | 0.0%      | 5.1%   |
| Heteroptera       | 8                             | 6      | 4.3%      | 5.3%   | 1                           | 3      | 0.8%      | 3.1%   |
| Sternorrhyncha    | 45                            | 25     | 24.3%     | 21.9%  | 35                          | 29     | 26.3%     | 29.6%  |
| Ephemeroptera     | 2                             | 0      | 1.1%      | 0.0%   | 0                           | 0      | 0.0%      | 0.0%   |
| Neuroptera        | 2                             | 2      | 1.1%      | 1.8%   | 1                           | 2      | 0.8%      | 2.0%   |
| Psocoptera        | 2                             | 3      | 1.1%      | 2.6%   | 0                           | 0      | 0.0%      | 0.0%   |
| Thysanoptera      | 2                             | 0      | 1.1%      | 0.0%   | 1                           | 0      | 0.8%      | 0.0%   |
| Trichoptera       | 0                             | 1      | 0.0%      | 0.9%   | 0                           | 0      | 0.0%      | 0.0%   |
| Sum:              | 185                           | 114    | 100.0%    | 100.0% | 133                         | 98     | 100.0%    | 100.0% |
